# Supplementary material for: Cowpea genetic diversity, population structure and genome-wide association studies in Malawi: insights for breeding programs
Source: Front Plant Sci. 2025 Jan 20;15:1461631. doi: 10.3389/fpls.2024.1461631 (PMC11788394; doi:10.3389/fpls.2024.1461631)
Supplement: Supplementary file 6 [file Table2.xlsx]

## Sheet: Sheet1
Table S2 List of measured traits and measurement standards
Trait	Measurement
Peduncle length (cm)	Average length of 10 peduncles from each of 10 randomly selected plants
Days to 50% flowering	Number of days from sowing to the stage when 50% of plants have begun to flower
Days to 90% maturity	Number of days from sowing to the stage when 90% of pods in a plot turn yellowish brown
Pods per plant	The mean number of mature pods from 10 randomly selected and tagged plants in a plot
Seeds per pod	The mean number of seeds per pod from 10 mature pods randomly selected
Seed length (mm)	Average length of 10 randomly selected mature seeds excluding those from the extremities of pods
Seed width (mm)	Average width of the 10 randomly selected seeds measured from hilum to the keel
100-seed weight (g)	Weight of one hundred randomly selected seeds of a genotype measured in grams (Weight of 100 seeds moisture content 12%)
Grain yield (kg/ha)	The average grain yield per plot and converted into kg/ha
