# Supplementary material for: Cowpea genetic diversity, population structure and genome-wide association studies in Malawi: insights for breeding programs
Source: Front Plant Sci. 2025 Jan 20;15:1461631. doi: 10.3389/fpls.2024.1461631 (PMC11788394; doi:10.3389/fpls.2024.1461631)
Supplement: Supplementary file 7 [file Table3.xlsx]

## Sheet: Trait BLUEs and BLUPs
Table S3. Genotype mean performance at Bunda College of Agriculture, Chitedze Research Station and across the two locations
Location	Genotype	BLUP_DF50	BLUE_DF50	BLUP_MAT90	BLUE_MAT90	BLUP_SDPPOD	BLUE_SDPPOD	BLUP_GRNYLD	BLUE_GRNYLD	BLUP_HSDWT	BLUE_HSDWT	BLUP_PEDLNG	BLUE_PEDLNG	BLUP_PODSPP	BLUE_PODSPP	BLUP_SDLEN	BLUE_SDLEN	BLUP_SDWDT	BLUE_SDWDT
Bunda College	Aloka Local	58.4959	58.2172	105.62	105.651	11.6015	10.9583	1141.08	984.995	14.1017	14.2426	11.4026	9.13442	20.3191	17.9107	7.27652	7.27755	4.63579	4.55542
Bunda College	B301	56.9923	56.4024	100.505	99.8594	13.6554	13.8116	1964.61	2118.04	9.95801	9.2784	15.2247	15.1407	33.037	37.4921	6.16466	5.94965	4.24061	4.0777
Bunda College	Danila	58.2314	57.8832	105.97	106.1	11.8368	11.2908	1467.78	1455.15	13.7434	13.9946	16.7709	17.3799	22.7258	21.3337	7.85316	8.00013	5.45278	5.57116
Bunda College	Fahari	61.6359	61.6278	104.717	104.621	13.4535	13.6324	1667.91	1730.42	9.93576	9.23089	17.5582	18.9168	30.0666	32.6604	7.01402	6.97626	4.63584	4.57039
Bunda College	GUARIBA	57.52	57.341	103.498	103.265	11.8888	11.3688	1275.14	1212.8	14.0874	14.3443	13.6243	12.694	24.7407	24.9859	6.69855	6.59627	4.84378	4.82212
Bunda College	INIA - 36	56.2436	55.8162	106.951	107.154	11.2653	10.5955	1488.4	1470.79	15.4664	16.1221	18.3706	20.1237	29.6781	32.0799	7.7008	7.81395	5.12515	5.16579
Bunda College	INIA - 73	54.8098	54.199	98.5315	97.6717	13.3599	13.5289	1824.8	1948.1	13.2769	13.3099	14.4249	13.7492	32.5066	37.0243	5.75012	5.44217	4.14826	3.94658
Bunda College	IT-18	55.823	55.3001	99.9488	99.3132	13.6344	13.8059	1786.32	1890.42	9.64945	8.92632	15.6196	15.5385	25.4861	25.7291	6.30833	6.14334	4.4949	4.39569
Bunda College	IT00K-1263	54.6966	54.1964	87.4233	85.1588	14.6623	15.2777	1714.12	1775.35	10.4957	9.92889	22.4744	26.496	26.4918	27.2463	6.07197	5.86432	4.39971	4.28282
Bunda College	IT04K-108	54.9395	54.474	96.7953	95.7108	14.0773	14.5524	1907.27	2079.37	13.0008	13.0464	15.6825	16.2178	27.5648	29.6205	6.57497	6.46022	4.45389	4.34151
Bunda College	IT04K-227-4	56.8825	56.4853	99.1321	98.3158	13.3251	13.3915	1419.15	1400.07	14.527	14.7779	17.5255	18.7001	26.6938	27.7629	7.1303	7.09223	4.91554	4.89766
Bunda College	IT04K-321-1	57.1633	56.8086	103.865	103.703	12.5683	12.33	1385.51	1328.06	11.5404	11.1697	17.5891	18.879	26.2946	26.9794	7.19284	7.20471	4.98452	4.99252
Bunda College	IT06K-108	56.4278	55.9919	98.4224	97.5707	13.9721	14.2756	2131.47	2307.52	12.3455	12.1496	14.4653	13.6103	31.4721	34.5529	6.42631	6.26905	4.64131	4.562
Bunda College	IT07K-210-1-1	58.9934	58.8069	97.1558	96.0701	12.6478	12.4925	2158.44	2382.78	13.9082	14.174	14.2226	13.6224	34.7919	40.8712	6.89769	6.8497	4.6366	4.55914
Bunda College	IT07K-230-2-9	60.9482	60.8029	105.614	105.64	12.4731	12.1835	1848.43	1919.41	12.6839	12.5628	14.8499	14.4554	24.8642	24.0165	7.37333	7.40053	4.97825	4.9862
Bunda College	IT07K-297-13	55.8769	55.3314	103.763	103.584	12.3339	11.9835	1886	2055.68	15.6845	16.4015	15.1843	15.2719	26.571	27.7836	7.42056	7.47515	4.73962	4.69555
Bunda College	IT07K-299-6	56.4765	56.0818	99.5037	98.7992	12.235	11.841	1404.04	1389.24	13.4425	13.598	15.3789	15.521	25.2577	25.9516	7.20086	7.19987	4.72021	4.67861
Bunda College	IT07K-318-33	58.4413	58.0768	108.127	108.446	11.4379	10.6973	1392.24	1315.22	14.9654	15.4393	17.9029	18.8899	25.8788	26.1125	8.21513	8.43473	5.57948	5.72239
Bunda College	IT08K-150-12	57.6355	57.1911	105.706	105.743	12.3674	12.0929	2122.13	2361.8	17.4348	18.5821	18.2193	20.0625	24.7954	24.6534	7.96748	8.10928	5.2085	5.26902
Bunda College	IT08K-180-11	57.9578	57.6308	105.151	105.075	12.1798	11.7816	2051.41	2254.34	13.9644	14.1765	15.7962	15.6766	27.5458	29.1801	7.54293	7.60501	5.06831	5.08659
Bunda College	IT09K-227-9	56.8178	56.516	103.001	102.747	13.1139	13.0783	2026.56	2166.53	11.1235	10.7244	19.4858	21.635	30.1455	32.6582	6.83469	6.77252	4.74137	4.69368
Bunda College	IT10K-817-1A	57.153	56.7596	95.1465	93.8168	13.2819	13.3545	2104.6	2297.09	14.2398	14.6251	16.111	16.5666	26.733	28.1118	7.2901	7.32101	4.77591	4.72587
Bunda College	IT10K-817-1B	55.9004	55.426	95.5641	94.3522	11.573	10.9872	2055.68	2309.56	13.5051	13.677	15.987	16.7782	26.0052	26.8413	7.55787	7.65618	5.03856	5.06359
Bunda College	IT10K-817-3	56.3221	55.8417	93.4657	92.0036	12.9252	12.8233	2512.18	2847.54	15.6778	16.3881	16.2816	16.8599	27.2783	28.3852	7.61938	7.7121	4.99294	5.01164
Bunda College	IT10K-817-7	53.911	53.1962	89.3306	87.2942	13.2166	13.359	2231.08	2536.85	14.8293	15.2509	20.4118	23.659	27.6969	30.0497	7.49293	7.53971	4.9936	5.0028
Bunda College	IT10K-834-3	56.4902	56.1795	99.8779	99.2775	11.4114	10.7563	2266.21	2573.96	15.7327	16.5273	15.2145	15.5352	29.3704	31.9488	6.96921	6.93914	4.76487	4.74447
Bunda College	IT10K-973-1	57.7687	57.3223	105.41	105.453	11.9602	11.4174	1781.88	1844.88	17.5408	18.7066	17.0269	17.7621	25.8991	26.1847	7.84	7.99069	5.26592	5.34772
Bunda College	IT10K-985-3	54.3909	54.0151	105.311	105.488	10.8971	9.99723	1384.88	1341.66	13.9871	14.3047	13.8827	13.0868	22.8008	22.0784	8.82192	9.17584	5.15711	5.22303
Bunda College	IT13K-1079-3	59.056	58.7272	99.7576	99.0072	10.1301	8.92646	1233.65	1114.71	18.7544	20.0311	18.9248	20.7973	24.0559	23.4092	7.59909	7.67748	5.12236	5.14572
Bunda College	IT82E-16	51.81	51.1552	86.2454	83.9227	13.7237	13.9504	1899.53	2039.12	11.4337	11.0539	11.9477	9.93435	25.6781	26.4288	6.33629	6.15622	4.60289	4.53223
Bunda College	IT835-728-5	56.1424	55.652	97.9816	97.112	13.2371	13.2796	1185.03	1117.05	10.9238	10.597	15.3374	15.6569	20.6756	18.196	7.1873	7.21342	4.66497	4.62832
Bunda College	IT90K-76	55.8931	55.4236	106.224	106.357	13.1433	13.0855	2029.54	2196.3	11.974	11.8369	19.8688	22.4503	23.3422	21.8147	7.6508	7.7784	5.0219	5.0523
Bunda College	IT93K-452-1	57.5491	56.9718	104.702	104.559	12.9685	12.8649	1696.71	1808.48	16.1198	17.024	19.7737	22.2768	24.802	24.6437	7.22938	7.24171	5.15987	5.2137
Bunda College	IT97K-1069-6	54.1955	53.5633	97.6915	96.7437	14.3881	14.945	2194.35	2412.4	10.8424	10.392	19.3522	21.8606	29.6493	32.1018	6.42285	6.26877	4.67494	4.61222
Bunda College	IT97K-390-2	55.2736	54.5705	101.676	101.141	14.3662	14.8688	1732.51	1771.9	10.7068	10.1102	16.1705	16.8099	28.033	29.2357	7.37664	7.42052	4.89094	4.87742
Bunda College	IT97K-499-35	58.3252	58.2203	106.014	106.24	12.2961	11.9439	1812.62	1921.05	13.5616	13.8677	14.8708	14.9634	23.743	23.6291	7.62638	7.75079	5.29877	5.39086
Bunda College	IT98K-131-2	60.6017	60.5801	105.475	105.55	11.2912	10.5085	1891.24	2013.83	13.1108	13.1596	17.6435	18.9954	28.8993	31.1222	8.12046	8.31464	5.37147	5.47799
Bunda College	IT98K-205-8	57.712	57.2697	106.252	106.331	12.6712	12.4814	1854.97	1954.68	13.1718	13.2609	17.0468	17.8877	26.2018	26.774	7.33501	7.36502	5.05509	5.07838
Bunda College	IT98K-390-2	59.9952	59.905	106.372	106.577	12.8776	12.7723	1861.09	1951.85	12.6739	12.6101	15.2331	15.0784	30.2168	33.0258	7.39999	7.44151	4.94974	4.95934
Bunda College	IT98K-503-1	54.9853	54.4618	99.7367	99.1076	11.7304	11.2037	1730.84	1849.01	14.1598	14.4514	16.2233	16.7621	27.0823	28.4214	7.75248	7.86449	5.21183	5.29295
Bunda College	IT99k-1122	55.0955	54.6609	95.8095	94.7622	14.1493	14.5842	2532.55	2868.33	11.1436	10.7495	16.1857	16.3274	27.0178	28.1095	6.75416	6.6718	5.25334	5.32379
Bunda College	IT99K-241-2	58.4562	58.0184	107.826	108.001	12.9114	12.9227	1896.23	2084.21	15.4092	15.888	14.1802	13.4568	26.2996	27.4766	8.14903	8.31064	5.39946	5.49645
Bunda College	IT99K-407-8	54.5623	54.1705	97.9226	97.1135	15.1044	15.9233	1705.37	1775.53	13.6634	13.8615	14.02	13.3504	27.2249	28.7786	6.71936	6.62771	4.94546	4.96216
Bunda College	IT99K-409-8	54.8601	54.3734	94.3016	93.028	13.0908	12.9913	1448.82	1415.01	13.5157	13.6578	16.2819	16.8649	27.4512	28.9176	6.50631	6.38586	4.7261	4.67623
Bunda College	IT99K-529-1	53.9074	53.0217	95.4561	94.1019	12.8064	12.7323	1485.49	1530.71	12.67	12.6437	12.15	10.6311	20.4205	18.3698	7.08037	7.04971	4.69221	4.64043
Bunda College	IT99K-573-1-1	61.0697	60.9738	108.46	108.833	12.0752	11.6613	1658.96	1764.47	16.9846	18	13.8002	12.8984	22.8943	21.9596	8.35472	8.5995	5.63018	5.78907
Bunda College	IT99K-573-2-1	57.5174	57.0246	102.725	102.301	12.1519	11.7922	1819.48	1954.56	12.8254	12.7433	17.2825	18.3638	26.6787	28.4048	7.57841	7.63142	5.14473	5.1831
Bunda College	IT99K-7-21-2-2-1	57.1783	56.7237	101.668	101.138	11.8023	11.306	1431.12	1385.97	16.6375	17.4316	12.1543	10.3305	23.2304	22.1459	7.45549	7.50827	5.1831	5.23164
Bunda College	Mkanakaufiti	61.6426	61.734	107.328	107.58	12.0051	11.6321	1627.48	1660.03	12.0468	11.7449	14.8061	15.0071	28.6575	30.5859	8.05288	8.21271	5.44114	5.5427
Bunda College	MWcp03	71.4278	72.3422	115.471	116.838	11.8473	11.3826	2509.54	2831.62	21.9843	24.096	14.8626	14.5171	27.2605	28.356	9.84446	10.3786	6.37615	6.71327
Bunda College	MWcp04	68.5638	69.0096	104.683	104.526	12.7867	12.6763	2502.26	2901.92	19.5563	21.0934	14.4609	13.9473	26.3828	27.4997	7.87335	8.00892	5.17915	5.22749
Bunda College	MWcp05	73.3461	74.3799	114.099	115.283	12.0946	11.6351	1123.43	992.16	15.1985	15.8334	14.5925	14.2442	24.4907	23.9481	8.5199	8.81834	5.26924	5.35531
Bunda College	MWcp06	59.3474	59.2859	107.334	107.619	12.9565	12.9425	1319.95	1341.65	14.6181	15.0977	16.0153	16.4543	22.2344	21.0167	8.19472	8.40347	5.45194	5.58201
Bunda College	MWcp07	69.8365	70.6079	117.501	119.075	15.0364	15.7467	1404.77	1344.47	12.674	12.5629	15.9456	15.9428	25.645	25.7615	8.27384	8.47752	5.65031	5.80425
Bunda College	MWcp08	56.2445	55.771	102.865	102.529	14.6864	15.3072	2052.78	2231.88	15.929	16.6002	18.3225	20.0226	22.3031	20.8784	6.68851	6.5788	5.18577	5.24646
Bunda College	MWcp09	74.1545	75.1883	125.05	127.552	12.7697	12.584	483.641	94.6406	15.5027	16.1733	14.4535	14.2121	25.3235	25.1199	8.62803	8.92955	6.12869	6.39233
Bunda College	MWcp10	70.1193	70.8851	105.233	105.238	14.3872	14.8505	1223.97	1057.04	12.9864	12.9707	13.9896	12.9293	21.4117	19.3417	7.68187	7.77634	5.16335	5.21223
Bunda College	MWcp11	56.9376	56.4936	100.892	100.27	14.7029	15.334	1891.07	2039.38	12.4098	12.3386	16.8423	17.828	24.1842	24.0192	6.6726	6.57203	5.08187	5.13058
Bunda College	MWcp15	56.1058	55.7453	111.229	112.145	13.4698	13.5556	1487.5	1447.44	17.3911	18.5221	15.7458	15.9787	21.8238	19.8877	8.23432	8.47582	5.79413	6.00018
Bunda College	MWcp17	74.5887	75.6794	115.762	117.076	9.89473	8.57227	849.414	598.958	14.5424	14.8626	10.7561	7.59723	25.3668	25.3807	8.40782	8.66019	5.60152	5.74604
Bunda College	MWcp18	59.3957	59.177	104.627	104.503	14.6301	15.2406	1227.43	1118.74	13.9993	14.2369	12.1215	9.95755	20.6261	18.7118	7.26396	7.28276	4.9845	4.98887
Bunda College	MWcp19	59.3161	59.0141	104.96	104.915	13.4282	13.5565	2134.23	2385.86	18.6884	20.117	19.7346	22.6702	22.9666	21.5136	7.95245	8.12722	5.66801	5.83765
Bunda College	MWcp20	58.4331	58.2072	106.511	106.682	14.4672	15.0556	1821.25	1931.6	16.5614	17.3387	17.3477	18.5924	24.1736	24.0067	7.8235	7.94612	5.04394	5.06512
Bunda College	MWcp21	77.9871	79.4355	123.733	126.085	12.2838	11.9217	953.492	759.931	16.3328	17.0944	16.6189	17.2155	25.282	25.3428	8.80421	9.13943	5.80463	6.00047
Bunda College	MWcp2227	59.073	59.249	101.55	101.325	14.2091	14.6317	2052.58	2202.02	11.47	11.2143	19.6945	22.2164	29.2959	31.6312	6.84579	6.80687	4.6621	4.61918
Bunda College	MWcp2232	56.4066	56.0424	100.298	99.7833	15.5762	16.5871	2466.58	2814.75	8.97282	8.19382	18.9104	21.0974	27.0454	28.0989	6.30546	6.13179	4.59108	4.53577
Bunda College	MWcp23	56.9516	56.6344	101.445	100.991	14.5382	15.1005	1861.15	2022.49	12.2376	12.1148	16.2919	16.8964	25.2397	25.7293	7.57823	7.64866	5.24756	5.3188
Bunda College	MWcp24	67.5561	67.9811	106.749	106.907	12.156	11.7723	2364.89	2676.84	19.6582	21.1952	17.9235	19.6888	22.4082	20.8642	8.49428	8.7784	5.95229	6.18368
Bunda College	MWcp25	56.2043	55.7519	103.622	103.43	12.5855	12.3041	1306.11	1250.65	12.7364	12.7852	14.0327	13.3808	25.3664	25.659	7.79156	7.91318	5.09402	5.13582
Bunda College	MWcp26	75.3866	76.6034	118.059	119.694	13.2514	13.3515	838.015	661.266	16.6819	17.4782	13.0538	12.0715	24.7533	25.6602	8.68582	8.97151	5.45024	5.56494
Bunda College	MWcp27	56.2286	55.7467	91.5877	89.8252	15.8026	16.8165	2130.13	2267.5	12.3454	12.2274	22.75	26.471	28.2786	29.5126	6.27638	6.09972	4.92085	4.91352
Bunda College	MWcp28	58.7909	58.6004	102.765	102.498	13.2777	13.3655	1187.03	1131.42	13.5811	13.7748	13.7327	12.9639	21.3902	20.3536	7.14649	7.14601	5.09834	5.12434
Bunda College	MWcp29	72.9495	73.9622	121.247	123.327	12.8128	12.7449	888.545	713.725	15.6376	16.2688	14.6099	14.4655	23.205	22.5011	8.85114	9.18094	6.04826	6.30037
Bunda College	MWcp30	56.8458	56.4881	100.051	99.428	14.0916	14.5069	1776.15	1885.59	11.885	11.5825	21.2805	24.4504	25.2101	24.8454	6.15078	5.93843	4.86218	4.84169
Bunda College	MWcp305	55.507	55.0056	99.6066	98.9414	16.3454	17.6241	2749.87	3181.78	12.1847	12.0668	18.0816	19.9273	27.9671	29.75	5.96813	5.74682	4.80121	4.77935
Bunda College	MWcp309	56.0864	55.6008	90.4793	88.6214	14.6363	15.2086	1538.38	1542.32	11.9091	11.7348	14.9816	14.6004	23.2558	22.3928	6.44997	6.30341	4.54948	4.46556
Bunda College	MWcp31	65.1964	65.409	107.315	107.526	13.9896	14.3668	934.503	780.652	10.0391	9.3203	13.3991	12.5282	23.5068	22.8396	6.69468	6.58205	4.83147	4.79522
Bunda College	MWcp32	55.3629	54.9474	104.971	105.049	13.4588	13.5834	2335.63	2563.6	17.7018	18.8668	16.3365	16.7576	24.3327	23.7463	7.90764	8.05641	5.62374	5.7761
Bunda College	MWcp3254	59.5803	59.4428	102.577	102.267	14.5267	15.1018	2184.76	2472.68	9.71838	8.97567	17.0512	18.1358	26.2863	27.6052	6.68519	6.57943	4.54456	4.45215
Bunda College	MWcp33	66.2588	66.5328	112.714	113.622	12.5963	12.3859	1790.33	1892.75	17.2458	18.2683	18.0905	19.7168	31.2038	34.3887	9.22697	9.63156	6.07579	6.33851
Bunda College	MWcp34	57.9826	57.7788	104.529	104.472	13.212	13.1716	1452.7	1446.45	14.6197	15.0281	12.6169	10.8736	22.4112	21.1186	7.233	7.22782	5.41744	5.52669
Bunda College	MWcp35	66.4728	66.8384	117.266	118.796	12.5392	12.3012	1107.49	975.16	17.8403	18.9513	16.0876	16.392	23.0954	22.3825	8.48258	8.73966	5.60015	5.74594
Bunda College	MWcp36	71.84	72.5147	116.141	117.414	12.1898	11.8845	1349.43	1348.36	23.6642	26.1513	16.9886	17.9459	21.5574	19.9823	9.03248	9.38423	6.22825	6.50535
Bunda College	MWcp37	79.4781	80.8812	127.341	130.019	13.4229	13.5044	623.028	277.957	14.6889	14.9801	14.8343	14.1588	18.91	15.5661	8.90942	9.22615	5.72621	5.89523
Bunda College	MWcp38	57.5827	57.0811	112.015	112.737	13.1796	13.2811	2810.71	3338.85	17.304	18.3405	16.9481	17.8199	26.9346	28.4781	8.31856	8.54468	5.7058	5.86198
Bunda College	MWcp39	58.0646	57.7472	104.688	104.63	15.083	15.824	2233.39	2496.07	16.7303	17.5789	14.8717	14.7323	24.2815	24.4095	7.89129	8.03165	5.42426	5.53082
Bunda College	MWcp40	74.2814	75.4786	119.717	121.567	12.0166	11.5488	978.48	791.964	17.2614	18.262	15.8831	16.3945	24.9605	25.3314	9.01842	9.3911	6.26918	6.56454
Bunda College	MWcp41	55.5289	54.8582	100.132	99.3819	14.1357	14.602	1784.59	1926.82	13.6971	13.8091	15.2299	15.4395	23.6052	23.56	7.14273	7.11937	5.13373	5.16861
Bunda College	MWcp43	74.7801	75.9491	119.154	120.965	10.6063	9.56227	849.243	656.223	15.3609	15.9631	15.2636	15.1711	28.4473	30.5038	8.22753	8.4491	5.47625	5.59821
Bunda College	MWcp44	79.5353	81.0621	124.877	127.384	12.1951	11.8336	931.045	717.084	15.8063	16.4025	14.9605	14.5432	23.1504	22.0098	9.60952	10.0993	6.71178	7.10947
Bunda College	MWcp45	65.9897	66.2585	107.225	107.419	12.4298	12.217	1745.36	1855.94	20.199	21.75	15.3117	15.4432	24.8157	25.3675	8.4786	8.71352	5.81585	5.99942
Bunda College	MWcp46	80.1059	81.551	122.225	124.394	12.2978	11.9565	1638.41	1738.03	16.7742	17.689	11.643	9.47854	25.3153	26.1465	8.32328	8.55922	6.02135	6.26692
Bunda College	MWcp47	57.6613	57.0922	99.7073	98.8831	14.0224	14.4193	2384.55	2668.36	15.7149	16.2688	17.636	18.6711	22.0069	20.3024	7.86793	7.99167	5.39906	5.49077
Bunda College	MWcp479	57.8154	57.4433	95.9612	94.7023	15.325	16.2023	1475.56	1506.92	10.9496	10.4721	15.46	15.6673	23.9658	24.1517	5.79626	5.52407	4.65689	4.59862
Bunda College	MWcp48	73.7289	74.6701	114.736	115.873	11.8259	11.288	1831.27	1971.66	19.3164	20.8167	17.3074	18.6161	27.0475	28.3429	9.1145	9.50325	6.05136	6.29802
Bunda College	MWcp49	71.7038	72.5139	109.475	109.977	12.0745	11.6632	1222.54	1141.35	18.4896	19.769	19.1065	21.4146	22.7793	21.8828	9.12451	9.52735	6.44743	6.79065
Bunda College	MWcp50	78.6038	80.0477	124.426	126.89	12.7389	12.5714	929.175	759.414	15.1527	15.7271	13.4267	12.8381	22.9476	21.5515	8.82525	9.18038	5.52477	5.67017
Bunda College	MWcp51	55.6645	55.1831	103.815	103.56	13.2718	13.3348	1837.06	1976.06	15.3875	15.9447	16.3091	16.7661	24.473	25.4399	7.3607	7.3805	5.30397	5.37668
Bunda College	MWcp52	67.375	67.8467	119.751	121.556	11.5293	10.8863	898.684	692.141	15.7194	16.3708	11.9966	10.0469	25.4953	26.1391	8.87029	9.20647	5.60678	5.7578
Bunda College	MWcp53	69.5393	70.2002	106	106.067	11.9876	11.5655	1980.04	2162.06	19.7467	21.3348	17.0125	18.0812	24.7013	24.6564	8.47397	8.73375	5.7252	5.89978
Bunda College	MWcp54	81.3756	83.0043	125.903	128.515	11.7533	11.2756	841.26	682.547	16.1277	16.8467	11.3466	9.553	21.9133	20.6084	7.73705	7.82763	5.30551	5.40124
Bunda College	MWcp55	55.4384	55.2952	104.353	104.374	12.9342	12.8613	2168.64	2379.87	15.0869	15.5552	16.0305	16.3708	25.8323	26.4986	7.94798	8.10917	5.3308	5.4322
Bunda College	MWcp57	73.5165	74.5422	118.155	119.829	14.033	14.3847	1324.47	1231.02	16.781	17.5999	17.6775	18.704	25.5364	25.6371	8.83945	9.16332	6.15534	6.41967
Bunda College	MWcp58	57.4746	57.2015	99.1671	98.4237	13.8414	14.1489	1390.22	1378.52	14.1184	14.39	12.9761	11.4555	22.5488	21.6435	6.87211	6.81665	4.85382	4.83103
Bunda College	MWcp59	57.6581	57.2823	104.585	104.508	13.8316	14.15	2103.09	2329.05	17.4123	18.4791	17.255	18.6042	25.0274	25.3927	8.45011	8.70444	5.52619	5.67203
Bunda College	MWcp60	62.9094	62.9254	105.459	105.41	12.3605	12.1375	2813.58	3273.7	20.3663	22.1005	19.0015	21.0813	25.2915	25.8068	8.03946	8.19674	5.9286	6.15392
Bunda College	MWcp601	56.0948	55.5254	101.096	100.512	15.2809	16.1096	1470.64	1478.74	11.7633	11.5844	13.8933	12.9635	26.4005	27.5112	6.84103	6.7759	4.95091	4.95561
Bunda College	MWcp61	72.6041	73.6819	118.781	120.631	13.9167	14.1977	1115.09	948.452	14.7195	15.1823	15.8346	16.0251	21.6014	19.7077	8.07656	8.27219	5.21104	5.28306
Bunda College	MWcp62	71.359	72.1327	117.07	118.514	11.9354	11.4733	1075.7	929.273	14.9698	15.4038	15.4692	15.5652	25.2431	25.1502	8.49228	8.747	5.62719	5.77632
Bunda College	MWcp63	73.2022	74.1806	115.171	116.412	11.9544	11.4722	1915.8	2022.79	19.2371	20.6524	16.1101	16.2833	26.2788	26.8147	9.36556	9.77504	6.0765	6.32629
Bunda College	MWcp64	74.0997	75.1912	118.945	120.658	12.6827	12.6015	1134.56	1010.07	17.3073	18.8611	17.5542	18.7689	24.0427	24.8163	5.90567	5.64187	4.63635	4.56547
Bunda College	MWcp645	55.7502	55.1683	100.54	99.9218	14.0042	14.4229	1918.13	2046.67	12.1809	11.8988	13.6161	12.7668	22.6678	21.3876	7.16227	7.14153	5.23633	5.28612
Bunda College	MWcp65	74.816	75.9642	124.217	126.679	12.1884	11.7434	1112.12	983.052	15.9458	16.7114	16.9542	17.7713	23.2106	22.3917	8.95759	9.32063	6.41786	6.76832
Bunda College	MWcp66	56.6267	56.2121	103.58	103.329	13.5342	13.7359	1856.11	2001.13	15.6915	16.3319	14.1569	13.266	25.5098	26.3142	7.03066	6.97362	5.05254	5.05261
Bunda College	MWcp67	61.1599	61.2044	104.935	104.905	12.9235	12.8228	2172.53	2413.14	20.7649	22.5212	16.2888	17.0999	24.885	24.7383	7.69302	7.79646	5.45455	5.57436
Bunda College	MWcp68	66.3748	66.6086	116.847	118.169	13.9956	14.4208	1554.27	1598.23	15.4535	15.9255	14.5722	14.2629	22.0994	21.0245	7.78793	7.87259	5.53191	5.66298
Bunda College	MWcp69	80.8586	82.3485	119.961	121.82	12.63	12.4454	827.265	599.693	14.3887	14.756	15.1928	15.0459	20.0006	17.1854	8.88963	9.23766	5.7022	5.87481
Bunda College	MWcp71	76.2014	77.3963	115.297	116.513	12.8583	12.7678	1966.65	2137.59	17.9031	19.0274	15.2276	15.2845	29.4365	32.3466	8.91026	9.24962	5.74606	5.91723
Bunda College	MWcp72	72.0795	72.9938	113.054	113.996	10.9017	10.0128	1517.97	1540.43	16.9905	17.9507	14.502	13.9555	28.5706	31.2017	9.59944	10.0847	6.04568	6.2846
Bunda College	MWcp73	70.2658	70.9076	120.11	121.948	13.6222	13.8189	1152.62	1093.87	14.5523	14.9606	16.7706	17.4914	21.4853	19.9137	8.66058	8.95405	5.69664	5.87448
Bunda College	MWcp76	77.8284	79.3615	120.993	123.163	13.0514	12.9932	1646.25	1667.68	14.0631	14.383	18.7396	20.192	33.4237	37.4638	8.43437	8.70477	5.64743	5.8253
Bunda College	MWcp91	75.9096	76.952	120.649	122.396	13.7506	14.0034	1988.47	2196.28	14.5994	15.0556	18.3238	19.8357	34.897	40.4315	7.81356	7.92948	5.49525	5.6321
Bunda College	MZcp 004	68.5824	69.3052	106.763	107.039	14.6769	15.2555	1434.15	1340.69	12.1907	11.989	19.1024	21.0268	27.8599	29.234	7.02935	6.99756	5.01916	5.02863
Bunda College	MZcp 011	67.561	68.2251	114.392	115.587	12.8192	12.6636	1732.61	1806.29	13.3962	13.5643	15.4881	15.7046	26.2767	26.8276	7.20815	7.22665	4.69456	4.6573
Bunda College	MZcp 012	69.9646	70.9643	107.846	108.335	13.7715	14.0199	1902.92	2035.38	10.4262	9.84484	18.0722	19.4838	25.166	25.59	7.46075	7.53051	5.02208	5.05905
Bunda College	MZcp 013	62.0756	61.9844	108.381	108.676	14.9493	15.7019	1698.38	1797.61	12.8182	12.7955	15.5945	15.4842	25.5061	26.2954	7.38627	7.41769	5.07931	5.09918
Bunda College	MZcp 014	64.0279	64.0963	105.792	105.84	15.3672	16.2235	1482.89	1502.97	9.91737	9.24573	15.0449	14.8396	24.8856	24.9001	7.27695	7.30415	4.69922	4.64865
Bunda College	MZcp 015	69.1349	69.9212	113.707	114.809	13.7881	14.0894	1207.11	1115.91	15.5841	16.2244	16.8179	17.5863	22.5473	21.935	8.28795	8.49308	5.43194	5.53156
Bunda College	MZcp 016	69.5074	70.1903	109.016	109.44	13.6593	13.8751	1124.4	1013.33	12.5327	12.4118	14.6743	14.2161	22.2582	21.3931	7.06816	7.045	5.34028	5.42111
Bunda College	MZcp 020	71.3102	72.2078	109.432	110.035	13.022	12.9587	999.36	851.265	15.8684	16.6201	20.2431	23.2279	20.0352	17.7371	8.15348	8.35632	5.54449	5.69194
Bunda College	MZcp 021	69.1916	69.9626	115.067	116.383	12.998	13.0007	2023.26	2201.95	17.5671	18.6297	18.9271	21.2177	21.5393	20.1313	8.21571	8.43644	5.66171	5.83203
Bunda College	MZcp 022	67.5406	68.2028	109.551	110.231	12.7326	12.5649	1416.44	1382.47	12.2287	12.1589	19.2647	21.1153	25.7219	25.9294	7.53594	7.62367	5.13279	5.18968
Bunda College	MZcp 023	70.5326	71.3193	108.047	108.501	13.5419	13.7731	1386.08	1411.01	13.8008	14.0914	19.809	22.5234	25.5151	26.1952	7.88294	8.02557	5.29631	5.40825
Bunda College	MZcp 024	68.2966	69.1096	108.897	109.464	14.9311	15.6834	1950.49	2155.65	15.0564	15.6668	18.7906	21.1128	25.3519	25.9119	7.56199	7.66394	5.76836	5.98578
Bunda College	MZcp 025	70.106	70.7696	105.304	105.258	14.8338	15.4868	1584.33	1653.48	14.3052	14.6314	16.2423	16.3909	25.752	26.6644	7.49609	7.54617	5.89536	6.10431
Bunda College	MZcp 026	71.282	72.0081	116.159	117.555	13.2643	13.2261	1714.23	1750.89	17.0458	18.0037	17.8139	18.8201	24.0976	23.3364	9.04276	9.42379	6.52882	6.89585
Bunda College	MZcp 030	69.4226	70.139	105.924	106.025	13.1349	13.1381	1495.62	1455.58	13.7817	13.9346	17.708	19.2252	24.9511	24.8668	7.12903	7.13592	4.88652	4.87501
Bunda College	MZcp 032	67.4264	67.8881	106.022	106.077	14.2488	14.6679	1363.74	1333.65	10.8542	10.3467	16.5957	17.3592	25.3829	25.6542	6.79062	6.70499	4.7778	4.75528
Bunda College	MZcp 044	69.8024	70.3283	105.77	105.84	14.5702	15.148	1759.74	1878.8	10.2893	9.78039	22.0942	26.1481	25.6725	25.4289	7.00014	6.97019	4.96002	4.97732
Bunda College	MZcp 045	55.975	55.426	103.61	103.358	14.908	15.69	1677.59	1811.97	9.1707	8.30976	12.9287	11.918	23.8594	23.7268	6.66208	6.55884	4.63788	4.5558
Bunda College	MZcp 046	55.4577	55.1837	103.194	103.123	13.631	13.829	1831.95	1952.52	11.6886	11.5456	13.8999	12.9978	26.7352	27.5279	5.55941	5.26237	4.29385	4.17576
Bunda College	Raha 1	63.0243	63.1019	104.627	104.534	15.1485	15.9815	1533.09	1542.67	12.8942	12.8255	16.3032	16.5511	29.2616	31.2505	6.97968	6.93026	4.86157	4.83549
Bunda College	Raha 2	59.1744	59.0115	98.3641	97.52	15.3108	16.3312	2255.36	2535.65	10.7603	10.1528	18.0081	19.8654	26.4167	27.6668	6.2896	6.08641	4.54866	4.44655
Bunda College	Sanzi	51.6624	50.8445	81.6602	78.7229	12.3041	11.9411	1378.12	1259.64	10.3756	9.78652	15.8965	15.4417	28.3721	29.7959	6.00218	5.76062	4.14743	3.95173
Bunda College	Sudan-1	54.4105	53.7017	88.1877	85.9083	14.6041	15.2742	2415.95	2788.62	13.1044	13.158	22.5307	26.8547	34.4934	40.7449	6.27847	6.08195	4.41825	4.2993
Bunda College	Tumaini	60.6437	60.6111	101.408	100.959	13.2726	13.3951	1938.84	2116.55	9.70458	8.9963	20.5077	23.6522	32.5992	36.918	6.89331	6.84455	4.93556	4.95141
Bunda College	TVu-10008	61.491	61.2891	105.975	105.994	11.5706	10.937	1155.12	1069.49	14.8447	15.3307	12.062	10.1141	21.9066	20.3557	8.39681	8.66	5.02559	5.03865
Bunda College	TVu-1002	57.4524	57.1069	104.425	104.32	11.1801	10.4094	410.955	92.3823	12.0686	11.7666	11.2131	9.0455	12.1384	5.5104	7.45679	7.51773	5.14492	5.19263
Bunda College	TVu-10035	63.9497	64.1553	103.109	102.842	11.3243	10.6014	1160.73	1023.27	13.1244	13.0639	10.2958	7.03287	21.8486	20.0854	7.71028	7.78925	5.01418	5.01422
Bunda College	TVu-1006	54.8901	54.2212	99.7195	98.9785	12.657	12.4637	1317.29	1242.12	13.7769	13.9635	15.3742	15.3737	22.6256	21.1543	7.52809	7.61009	5.08416	5.11573
Bunda College	TVu-1007	59.98	59.9101	103.476	103.244	14.0502	14.3531	1440.98	1412.84	12.2472	12.053	13.258	11.8916	20.8002	18.8817	7.3113	7.3516	4.9423	4.94034
Bunda College	TVu-1010	60.4604	60.3862	105.524	105.569	10.7705	9.76583	858.316	641.323	11.0587	10.6737	9.64728	6.5476	21.6454	19.749	6.8923	6.84621	4.63111	4.5656
Bunda College	TVu-1015	58.529	58.3626	103.674	103.539	12.6424	12.4796	1808.32	1933.73	13.1016	13.1935	14.4436	13.8887	25.2219	25.9117	6.79552	6.71362	4.77923	4.72605
Bunda College	TVu-10169	61.6425	61.6248	113.292	114.266	14.4502	15.0168	959.997	831.978	7.31071	5.99121	14.6471	14.6401	22.0467	21.3307	6.41328	6.25955	3.99754	3.78413
Bunda College	TVu-10180	59.9951	59.8289	105.517	105.537	12.7017	12.4851	663.045	345.589	9.93541	9.17448	14.6729	14.1469	22.0199	20.3446	5.97576	5.71717	4.15627	3.968
Bunda College	TVu-1042	60.8731	60.5848	106.187	106.234	11.354	10.6125	1370.79	1373.09	14.9781	15.495	14.5804	13.8479	27.5425	29.1939	7.42093	7.47423	4.92381	4.91389
Bunda College	TVu-10987	58.5279	58.2269	100.676	100.099	12.9444	12.817	1578.48	1592.13	11.6195	11.2303	15.6399	15.7195	23.9352	23.3492	7.48278	7.54271	5.00878	5.02024
Bunda College	TVu-11372	64.1843	64.3426	100.108	99.4128	11.6918	11.1549	1470.56	1431.56	9.57448	8.6949	12.7871	10.914	29.9416	32.4127	5.61924	5.2857	4.28695	4.12671
Bunda College	TVu-1143	62.7344	62.9448	101.895	101.597	15.0915	15.852	1831.79	1943.79	13.2476	13.2872	14.8944	14.5544	25.9673	26.7763	6.52827	6.40741	4.85957	4.84575
Bunda College	TVu-1146	51.9946	51.1153	86.9411	84.6529	10.5613	9.49228	599.41	298.679	13.13	13.2232	9.79599	6.50295	16.3267	12.0684	6.59391	6.49227	4.81301	4.78744
Bunda College	TVu-1149	56.2443	55.7944	105.757	105.823	12.2621	11.9107	1577.44	1565.07	10.3869	9.78557	10.6632	7.59992	24.4983	24.0898	6.72393	6.63739	4.54433	4.44852
Bunda College	TVu-11674	67.1805	67.627	102.4	102.062	14.1883	14.6278	1560.38	1621.25	10.3743	9.74184	15.6599	15.9394	22.5456	21.6745	6.45092	6.30448	4.79916	4.76878
Bunda College	TVu-1177	65.2938	65.5443	105.655	105.685	13.4828	13.6084	1142.72	1058.84	8.54672	7.4891	11.5629	9.44672	25.5332	25.7765	5.95998	5.69843	3.97237	3.74801
Bunda College	TVu-1178	67.4424	67.9998	102.883	102.608	14.2189	14.6282	1496.41	1507.04	10.4486	9.90864	20.1171	22.5966	29.07	32.43	7.02014	7.00353	4.67259	4.61485
Bunda College	TVu-1185	64.0889	64.3367	104.945	104.919	12.5203	12.2962	808.76	541.292	11.0053	10.4894	11.707	9.5098	20.7211	18.2161	6.23597	6.02764	4.34297	4.19983
Bunda College	TVu-12256	57.5505	57.3213	106.362	106.62	11.4424	10.7199	1528.23	1525.04	12.4146	12.4019	16.1729	16.6868	24.4903	24.1737	7.48682	7.58589	4.90169	4.91565
Bunda College	TVu-13265	52.4459	51.5791	105.59	105.59	9.71245	8.3685	929.508	774.507	14.9711	15.4693	9.14825	5.8146	21.6	20.0978	8.63722	8.93099	5.11492	5.16094
Bunda College	TVu-13413	67.1198	67.5634	104.177	104	14.9508	15.7521	1807.04	1943.69	11.9513	11.7158	18.067	19.7468	27.7998	30.4609	6.99304	6.93576	5.05351	5.0629
Bunda College	TVu-13600	62.7649	62.9495	107.427	107.705	13.8788	14.037	1462.28	1328	11.0446	10.549	14.3511	12.798	23.1214	21.528	6.32567	6.14632	4.64536	4.56733
Bunda College	TVu-14004	60.1329	60.0417	106.15	106.31	10.6888	9.69582	800.06	529.656	19.5032	21.0036	14.1811	13.4612	17.8002	14.0585	9.37051	9.81691	5.55119	5.68153
Bunda College	TVu-14528	55.5739	55.1958	98.1024	97.2993	13.9286	14.2591	1492.47	1500.93	9.5802	8.75139	15.2823	15.3714	27.1527	28.6795	5.9827	5.74492	4.33667	4.20412
Bunda College	TVu-1460	62.003	62.0776	107.873	108.251	12.3227	11.956	1582.27	1635.56	10.5476	10.0387	15.5451	15.8272	28.4055	31.0031	7.45933	7.53059	4.27856	4.13348
Bunda College	TVu-1472	60.0422	59.9342	104.82	104.789	12.7453	12.7121	1176.83	1105.4	8.95338	7.98731	15.2589	15.4274	20.7677	18.6859	6.64595	6.53252	4.60613	4.53081
Bunda College	TVu-1473	67.1668	67.6344	107.131	107.391	13.9316	14.2904	1298.13	1199.05	13.9598	14.2141	14.223	13.3664	26.6749	27.4358	6.72481	6.636	4.64555	4.57241
Bunda College	TVu-14745	61.1042	60.9674	104.488	104.351	13.7281	14.0002	2572.28	2948.91	10.024	9.34169	17.3289	18.1228	32.0702	36.358	6.07679	5.85317	4.25473	4.09907
Bunda College	TVu-1478	58.9436	58.7326	103.191	102.96	12.9113	12.8066	1182.05	1092.06	9.96735	9.31719	13.2786	12.5715	24.4271	24.6953	6.7099	6.62993	4.57717	4.49728
Bunda College	TVu-1482	57.7961	57.6273	101.684	101.314	12.0657	11.6348	1260.06	1092.44	9.1057	8.17301	13.6257	12.37	24.3343	23.6544	6.21019	6.00347	4.52937	4.43011
Bunda College	TVu-14828	60.6187	60.5486	103.857	103.656	10.3429	9.25757	1138.46	997.612	13.4073	13.4573	12.9252	11.336	20.2124	16.9907	7.70087	7.80308	5.43722	5.53925
Bunda College	TVu-1483	56.5213	56.0717	101.293	100.778	13.2822	13.3826	1389.72	1428.66	10.447	9.93391	14.063	13.4578	24.842	25.0857	5.63142	5.30919	4.40948	4.28491
Bunda College	TVu-1491	60.7941	60.6305	107.116	107.35	11.5947	11.0218	598.267	307.822	10.076	9.4345	10.5121	8.05021	19.1139	16.3105	6.13582	5.9339	4.17083	3.9957
Bunda College	TVu-1527	55.8721	55.4367	100.593	100.024	13.9741	14.3812	1556.37	1571.64	11.4362	10.9816	14.8055	14.7551	26.4425	27.358	6.48554	6.34506	4.7874	4.74422
Bunda College	TVu-154	59.0014	58.7032	105.029	104.98	12.566	12.3475	1396.81	1364.64	13.7406	13.9054	12.855	11.1699	26.8776	28.0101	6.89381	6.83588	4.52009	4.42469
Bunda College	TVu-15462	59.5772	59.6374	103.858	103.777	12.8212	12.6505	1996.76	2153.59	16.1743	16.9866	17.54	19.0927	25.6172	26.0378	7.55084	7.662	5.14463	5.20622
Bunda College	TVu-15631	68.8893	69.269	106.095	106.097	11.4514	10.7963	663.286	385.783	11.7866	11.493	11.5386	8.94128	15.7436	11.182	7.58918	7.66536	4.78949	4.73859
Bunda College	TVu-15693	58.714	58.5573	105.791	105.881	11.5233	10.9216	1048.6	915.06	13.4404	13.5376	12.6315	11.3766	20.0292	17.3967	8.14877	8.33554	5.27263	5.35076
Bunda College	TVu-15898	57.5506	57.2089	98.3253	97.4525	12.969	12.9287	1096.82	995.32	11.1351	10.7563	17.5443	18.9007	26.7315	28.2388	6.77426	6.69743	4.71803	4.67201
Bunda College	TVu-16325	52.3416	51.4967	91.3811	89.5917	12.9932	12.9645	651.9	350.094	12.1224	11.8686	10.6706	8.1428	18.0598	14.6499	7.09947	7.05593	4.76595	4.70708
Bunda College	TVu-16664	62.1569	62.2567	105.36	105.345	15.0311	15.8282	2060.74	2265.18	10.5583	9.92881	15.6841	16.553	30.5038	34.2778	6.78183	6.71213	4.77582	4.73642
Bunda College	TVu-16816	63.1177	63.3153	103.95	103.781	14.0373	14.4738	1000.07	860.039	10.4068	9.8869	14.5664	14.6637	25.707	26.7482	7.32851	7.3784	4.95993	4.96599
Bunda College	TVu-16829	53.4237	52.8555	105.223	105.21	11.1524	10.3419	1241.03	1130.07	14.5026	14.8527	14.1881	13.3038	22.0815	20.5946	8.5615	8.83453	5.10259	5.13209
Bunda College	TVu-17060	65.9958	66.2983	105.221	105.188	12.7582	12.703	1979.07	2153.14	7.52232	6.19964	13.0246	11.6939	30.019	32.8515	5.44368	5.06214	4.03432	3.80288
Bunda College	TVu-17179	62.1249	62.1467	106.45	106.688	12.562	12.2806	1416.26	1387.14	13.8204	14.0975	14.6208	14.6594	21.831	20.0249	7.68448	7.80871	5.19375	5.26706
Bunda College	TVu-17423	58.7782	58.3543	99.9793	99.267	11.1761	10.3883	752.23	517.802	11.33	10.9089	15.4084	15.4116	22.3341	21.1289	7.62054	7.70182	4.95333	4.94794
Bunda College	TVu-17526	56.5089	56.172	99.5447	98.8989	13.5647	13.7147	2176.58	2446.45	13.1093	13.2275	17.0146	17.8305	37.9709	45.8119	6.13385	5.9276	4.29863	4.13931
Bunda College	TVu-17537	55.3594	54.8579	102.353	102.013	14.049	14.4042	1616.17	1677.63	11.2497	10.9084	17.7548	19.3352	23.5333	23.1438	6.87799	6.83317	4.7908	4.76149
Bunda College	TVu-17553	56.6205	56.1246	101.709	101.188	15.1332	15.8504	1605.16	1618.58	11.8729	11.6362	16.866	17.198	23.681	22.7305	5.96396	5.72205	4.53155	4.44766
Bunda College	TVu-17565	66.7799	67.1446	106.557	106.707	14.3065	14.8846	1030.52	928.109	10.0457	9.34782	14.2429	13.818	21.3465	20.1579	6.6062	6.48342	4.60717	4.52344
Bunda College	TVu-17611	57.9842	57.6063	103.483	103.182	13.956	14.2889	2302.12	2564.25	11.5504	11.1563	19.283	21.3505	27.5621	28.9712	6.64109	6.5098	4.55688	4.45508
Bunda College	TVu-17657	62.8158	62.8759	104.672	104.567	11.8631	11.272	1613.19	1649.78	14.9278	15.4348	10.833	8.25581	24.0636	23.6609	8.3765	8.60788	5.56093	5.69208
Bunda College	TVu-17660	60.4869	60.4947	105.441	105.366	14.0836	14.4815	1101.96	993.755	11.3368	11.0254	11.708	10.0217	23.313	23.0183	6.32681	6.14679	4.51408	4.42145
Bunda College	TVu-17713	59.6959	59.7079	101.742	101.347	14.4879	15.0028	1675.94	1757.88	11.1476	10.7193	16.463	17.1403	26.4453	26.9859	6.0674	5.84194	4.55331	4.47452
Bunda College	TVu-17721	57.919	57.6688	102.284	101.992	13.6086	13.8854	1406.51	1409.54	9.74719	9.06557	12.9396	11.5264	22.7192	22.2104	6.38576	6.21439	4.55303	4.45434
Bunda College	TVu-17796	55.2858	54.7656	101.336	100.833	12.3225	12.076	1212.42	1098.11	9.996	9.19231	14.7736	14.4441	19.5878	16.6238	5.66998	5.3452	4.40166	4.27604
Bunda College	TVu-1785	61.8778	62.0869	106.51	106.838	12.0506	11.5755	433.273	33.261	8.97786	8.04733	8.34046	4.1087	21.5925	19.6913	7.23793	7.25013	4.00135	3.79494
Bunda College	TVu-1797	63.1215	63.1796	104.924	104.831	11.215	10.4115	1271.31	1208.17	11.7656	11.5115	9.47647	6.14685	18.8763	15.6158	6.12142	5.90393	4.47756	4.36961
Bunda College	TVu-1806	50.0632	49.0545	88.8615	86.844	11.2636	10.482	1014.58	815.839	10.3525	9.68519	9.9306	6.73204	26.9506	27.578	6.49408	6.36638	4.28119	4.13048
Bunda College	TVu-1909	51.0653	50.0021	94.1015	92.6111	12.9476	12.9193	1417.44	1446.49	11.3589	10.9365	12.0246	10.1937	23.7088	23.6849	6.58673	6.44431	4.71519	4.65983
Bunda College	TVu-2098	63.1496	63.1678	104.624	104.504	12.9657	12.961	1338.63	1302.56	12.8961	12.7755	16.2713	16.7006	23.6424	23.3387	6.71056	6.58828	4.60103	4.50456
Bunda College	TVu-22	62.6358	62.9492	106.164	106.357	12.9953	12.8946	971.246	796.334	13.1594	13.2331	12.3804	10.7349	16.7086	12.8657	8.10504	8.29875	4.63854	4.58338
Bunda College	TVu-2656	54.9676	54.3971	104.918	104.871	11.6147	11.0054	801.999	555.587	11.5721	11.2231	11.3214	9.22221	16.9915	12.8242	7.46031	7.5127	4.86429	4.83931
Bunda College	TVu-2657	55.8951	55.2785	102.595	102.138	13.0316	13.0154	1968.62	2123.69	12.4622	12.2434	19.381	21.3702	28.544	30.5179	6.96343	6.89376	4.95751	4.94403
Bunda College	TVu-2661	54.8925	54.4123	103.89	103.772	12.9159	12.8012	2371.34	2586.96	14.5469	14.9436	18.6429	20.4384	26.3729	26.6404	6.90377	6.86656	4.8322	4.80804
Bunda College	TVu-2665	59.3327	59.3433	106.788	107.082	13.0795	13.0384	2092.31	2256.04	12.5013	12.4271	14.4228	14.0524	27.7715	29.3728	6.36041	6.19287	4.42981	4.31236
Bunda College	TVu-267	54.5102	53.828	104.898	104.901	13.4553	13.5444	1326.62	1296.87	13.0186	13.1067	16.157	16.468	20.3325	17.9609	7.1381	7.15158	4.8687	4.85797
Bunda College	TVu-2685	65.9261	66.1901	109.761	110.283	14.2436	14.6675	918.248	713.326	11.3496	10.9558	16.4467	17.032	21.8753	20.5245	6.32103	6.14248	4.62447	4.54426
Bunda College	TVu-2687	66.0586	66.4562	105.164	105.187	13.4783	13.5976	581.52	289.961	13.0697	13.2547	11.6603	9.83311	16.8759	12.7697	6.25094	6.07133	4.26727	4.13734
Bunda College	TVu-2692	62.223	62.2979	103.573	103.361	13.8169	14.1129	984.35	830.414	9.97871	9.22869	19.9172	22.6953	20.9984	19.3868	6.14394	5.92302	4.7934	4.74367
Bunda College	TVu-2693	55.5207	54.9118	99.0751	98.158	14.3253	14.8092	1344.94	1310.26	10.3197	9.68338	13.1344	11.7457	26.2966	26.9794	6.03271	5.78218	4.38814	4.24925
Bunda College	TVu-2695	58.0793	57.8388	96.5569	95.4207	14.4027	14.9296	1494.38	1468.52	10.9691	10.4804	12.855	11.4527	27.2901	28.2894	6.35432	6.16581	4.40609	4.27922
Bunda College	TVu-2699	61.1191	60.9461	103.429	103.064	12.991	13.0168	1254.8	1177.01	9.70842	8.88469	11.5223	9.49435	29.5623	31.8165	6.47749	6.32005	4.35277	4.20494
Bunda College	TVu-2701	64.004	64.1991	104.98	104.94	12.39	12.1366	1364.75	1318.65	9.88809	9.139	14.729	14.0956	22.6121	21.6534	6.7315	6.633	4.53816	4.4408
Bunda College	TVu-2706	64.825	65.111	108.715	109.145	12.3803	12.1264	984.915	826.345	10.7392	10.1255	13.7278	12.848	20.1777	18.3351	7.83559	7.94584	4.77021	4.72121
Bunda College	TVu-2714	56.1897	55.7653	100.145	99.4819	13.4669	13.5192	1398.82	1374.36	9.56441	8.86799	12.3465	10.29	25.5285	25.7064	6.69292	6.60125	4.5627	4.4728
Bunda College	TVu-2716	58.8858	58.8648	105.146	105.208	13.2816	13.351	1072.4	906.357	10.6881	10.1112	13.0622	11.7192	21.1168	18.5849	6.3715	6.21156	4.57969	4.51201
Bunda College	TVu-2720	61.03	61.0192	104.679	104.723	13.083	13.0219	1216.17	1093.44	9.57079	8.86884	14.665	14.3937	19.6427	17.0272	6.16987	5.98895	4.46407	4.37251
Bunda College	TVu-273	61.7166	61.7239	104.955	104.892	14.3568	14.8971	1002.86	874.485	14.1525	14.5401	18.7421	21.1304	21.7162	20.1588	6.81761	6.7578	4.72771	4.68877
Bunda College	TVu-2978	56.3031	55.793	107.173	107.39	13.4755	13.5706	1412.05	1431.63	10.4641	9.87897	15.8398	15.7893	25.4401	25.8528	5.82638	5.5602	4.13798	3.95766
Bunda College	TVu-3063	55.5477	55.0179	103.098	102.811	12.0804	11.5719	1101.2	953.929	8.2226	7.21379	11.9659	9.94591	27.4791	28.7646	6.85158	6.80558	4.43786	4.3345
Bunda College	TVu-3064	62.3409	62.2989	108.776	109.185	11.6953	11.0933	957.42	764.837	9.35168	8.48465	13.2454	12.0432	22.1126	20.5646	6.66662	6.56977	4.09595	3.91019
Bunda College	TVu-3067	60.4004	60.4333	104.984	104.896	11.6175	11.0391	896.421	718.658	11.2448	10.7981	11.1963	9.34132	26.1355	27.2487	6.25003	6.06546	4.43546	4.31895
Bunda College	TVu-3090	63.203	63.3196	108.331	108.796	14.4404	14.985	1547.17	1654.57	11.6158	11.5111	12.8709	11.8369	26.9781	28.1321	6.36091	6.22227	4.53549	4.45742
Bunda College	TVu-3094	60.4507	60.3749	104.707	104.607	12.9409	12.8946	630.376	315.154	10.8359	10.3263	13.1021	11.7149	21.7083	19.6727	6.19045	5.97814	4.29324	4.13859
Bunda College	TVu-3097	55.6016	55.0112	99.5794	98.8467	12.3495	12.0722	718.573	440.035	10.2038	9.48479	12.261	10.7872	20.1763	17.6038	6.7913	6.70678	4.41118	4.28412
Bunda College	TVu-310	59.2306	58.8296	105.236	105.111	13.9698	14.4319	1533.58	1634.59	10.8464	10.2871	13.2401	12.2763	21.9877	20.8923	6.43943	6.28066	4.76871	4.72209
Bunda College	TVu-3101	56.8549	56.3804	106.526	106.664	12.2694	11.9629	370.085	70.3563	16.1205	17.0036	9.71434	7.08347	14.0658	8.51251	8.60444	8.88304	5.2507	5.33754
Bunda College	TVu-3217	71.6205	72.4861	105.048	104.971	12.3126	12.0109	1049.56	887.692	7.58002	6.2816	14.473	13.765	19.7925	17.1885	6.37291	6.19696	4.40377	4.28371
Bunda College	TVu-322	66.6871	67.114	101.651	101.246	11.4124	10.2907	954.101	638.981	14.1798	14.6062	11.3623	7.56583	20.3877	16.6565	5.99569	5.62826	4.56159	4.42605
Bunda College	TVu-3224	68.432	68.9291	103.499	103.336	15.135	15.9314	1052.19	874.389	10.9158	10.4727	19.0673	20.9047	24.4543	23.9239	5.44629	5.09818	4.15878	3.9779
Bunda College	TVu-3228	63.6294	63.8608	105.379	105.398	12.2971	11.9531	950.868	729.467	8.32284	7.19126	11.773	9.23714	21.0743	18.6746	6.47249	6.31857	4.74894	4.70217
Bunda College	TVu-3229	58.7346	58.4679	103.698	103.461	13.8652	14.1958	1786.2	1808.74	8.52394	7.37399	13.5056	12.2224	25.2788	25.2685	5.59427	5.24928	4.19575	4.00341
Bunda College	TVu-3231	64.4824	64.7819	105.625	105.675	12.7433	12.6096	1579.18	1605.15	10.3369	9.71909	17.5868	18.9105	21.1093	19.3618	6.58914	6.46128	4.60643	4.52464
Bunda College	TVu-3233	55.6827	55.1807	106.921	107.115	12.2927	12.0025	1454.52	1393.9	10.7704	10.205	11.1609	8.6262	27.1793	28.0904	5.92343	5.64782	4.33097	4.18047
Bunda College	TVu-3235	57.1835	56.738	106.313	106.389	13.6323	13.9683	1749.75	1876.25	9.36894	8.44321	19.0488	21.1651	27.2387	28.8939	6.35897	6.16673	4.55815	4.45372
Bunda College	TVu-3243	63.6532	63.7785	104.699	104.575	14.0265	14.468	1083.47	981.834	9.79761	8.96116	15.1467	15.4049	21.423	20.4112	6.69839	6.58969	4.54752	4.44727
Bunda College	TVu-3247	62.2993	62.3718	106.254	106.388	13.441	13.5182	1226.75	1133.12	9.94517	9.30304	15.6259	15.7421	24.3815	23.8988	6.86386	6.80787	4.75201	4.71467
Bunda College	TVu-3248	61.3275	61.1438	105.993	105.995	13.2083	13.2425	1786.02	1889.82	11.2561	10.7751	16.8977	17.5648	27.3243	29.0932	7.27568	7.28333	4.75606	4.70255
Bunda College	TVu-3249	61.9143	61.8599	106.301	106.389	13.3972	13.5131	1125.87	1061.72	11.8825	11.6678	15.3362	15.0943	22.2652	21.4325	7.01515	6.98029	4.76879	4.73201
Bunda College	TVu-3250	65.8825	66.1471	114.435	115.553	13.7021	14.0298	932.488	812.781	9.60845	8.8397	12.3718	11.0372	23.8455	23.5771	7.02187	6.97925	4.64683	4.57892
Bunda College	TVu-3252	61.1726	61.1707	104.472	104.39	13.547	13.71	1359.55	1317.2	9.92316	9.17979	18.109	19.3651	25.9295	26.3764	6.2696	6.07863	4.38798	4.25672
Bunda College	TVu-3253	61.137	60.9669	104.46	104.25	13.7539	14.0588	548.525	266.636	9.3725	8.46535	12.6375	10.8968	17.8079	14.1067	6.93865	6.85406	4.47425	4.34343
Bunda College	TVu-3254	61.9208	62.0916	103.903	103.847	12.7536	12.5413	1543.72	1539.01	13.3768	13.5355	13.0362	11.7217	24.1962	23.6636	7.27681	7.31112	5.00968	5.04358
Bunda College	TVu-3257	59.4443	59.317	104.473	104.394	13.893	14.2621	1195.88	1142.36	11.7392	11.4962	13.0685	12.0166	25.9412	26.9897	6.79559	6.71275	5.00419	5.02523
Bunda College	TVu-3259	59.7644	59.7177	105.312	105.335	12.8049	12.6967	1378.09	1322.19	10.5131	9.90214	13.5567	12.4491	23.9634	23.0325	6.9287	6.85558	4.74431	4.71472
Bunda College	TVu-3261	56.1022	55.4109	107.527	107.622	13.848	14.2031	1202.89	1110.92	11.5402	11.19	18.1573	19.8986	24.7909	24.4808	7.20936	7.19622	4.70364	4.65626
Bunda College	TVu-3262	59.0866	58.8073	107.732	108.036	12.8535	12.7188	1484.69	1475.52	8.8536	7.94424	15.5427	16.0842	26.1756	26.3782	7.43558	7.51255	4.62383	4.56383
Bunda College	TVu-3263	59.2318	58.9548	105.937	105.969	12.0739	11.6547	942.522	767.682	10.4574	9.81024	14.9384	14.6245	19.0417	16.013	6.74294	6.63364	4.70695	4.64949
Bunda College	TVu-3267	66.2648	66.8505	105.175	105.318	13.6721	13.8115	1052.33	889.661	10.0346	9.44332	13.6742	12.8458	18.8588	15.8583	6.77537	6.71339	4.51855	4.42738
Bunda College	TVu-328	59.297	59.0763	108.137	108.524	12.5664	12.3475	1013.06	868.602	10.2408	9.58969	11.5419	9.32004	21.364	19.3987	6.64898	6.54634	4.79653	4.76477
Bunda College	TVu-3502	61.0324	60.9284	103.851	103.628	13.6556	13.8346	1629.42	1679.15	13.786	14.0251	16.1874	16.7142	26.4242	27.2162	6.46303	6.30019	4.56988	4.50432
Bunda College	TVu-3504	60.363	60.5052	106.34	106.604	13.7536	13.948	1417.19	1406.11	11.7761	11.5814	15.1421	15.0315	26.8424	27.9993	6.52456	6.37878	4.64841	4.61023
Bunda College	TVu-3506	64.8377	65.1534	107.046	107.206	12.8844	12.7143	955.451	717.918	10.0109	9.37243	16.3458	16.6949	20.5719	17.9598	7.21076	7.22259	4.6864	4.61974
Bunda College	TVu-3508	58.6169	58.2353	104.986	104.933	13.5654	13.7007	1421.56	1396.7	10.6841	10.1533	17.4744	18.835	25.9938	26.3423	7.0699	7.05803	4.78387	4.75013
Bunda College	TVu-3509	62.5212	62.7976	105.859	106.059	12.4628	12.1614	1426.23	1367.19	11.0073	10.5527	13.8361	12.8043	21.8219	20.0758	6.33876	6.16516	4.4678	4.36852
Bunda College	TVu-3510	59.1459	58.9925	89.3438	87.3908	13.9445	14.2897	986.816	812.032	9.98315	9.40674	12.9342	11.6908	22.2628	20.6697	5.91904	5.66986	4.19428	4.02944
Bunda College	TVu-3511	65.7046	66.126	105.546	105.623	13.1407	13.1482	767.417	503.433	9.53637	8.78927	12.3382	10.5093	20.3882	18.3376	6.14598	5.95525	4.52251	4.42342
Bunda College	TVu-3515	65.9561	66.2568	109.68	110.22	13.2661	13.3259	1459.34	1435.07	12.0531	11.81	13.9856	13.0964	27.0969	28.1818	6.38504	6.2351	4.61052	4.53717
Bunda College	TVu-3524	61.6373	61.5669	97.6118	96.5434	15.4358	16.478	2634.56	3049.78	13.0471	12.9337	22.9801	27.499	36.5587	43.3058	5.9664	5.6928	4.26936	4.1044
Bunda College	TVu-3525	59.2309	59.0247	101.901	101.496	13.6919	13.8865	1543.97	1539.64	12.6256	12.6286	13.653	12.8228	27.9595	29.8636	6.57353	6.46037	4.66207	4.59889
Bunda College	TVu-3526	57.9656	57.6196	105.368	105.41	13.8784	14.1693	1611.06	1640.3	9.0812	8.21014	14.945	14.5893	28.314	29.9349	5.71504	5.42888	4.21126	4.04803
Bunda College	TVu-3532	57.3655	56.9012	105.097	104.955	14.0904	14.4558	1215.69	1154.74	9.12237	8.25672	10.6304	7.892	22.7593	22.0172	6.27388	6.08413	4.22822	4.06334
Bunda College	TVu-3533	64.5469	64.9352	105.394	105.41	13.2168	13.1817	971.97	798.858	12.7625	12.7291	11.9227	9.73652	21.5947	20.32	7.21073	7.21516	4.83549	4.81638
Bunda College	TVu-3534	57.8031	57.5937	108.587	109.111	13.3759	13.4603	1788.03	1845.4	10.4049	9.82743	16.1206	16.1106	27.7482	28.9581	7.01577	6.99189	5.00491	5.0183
Bunda College	TVu-3535	65.2388	65.5728	113.027	114.002	12.986	12.9329	945.305	749.273	11.0518	10.6468	20.3918	22.9857	24.893	24.8999	6.53342	6.38235	4.33659	4.18298
Bunda College	TVu-3540	61.845	61.7883	105.798	105.767	13.6027	13.7891	1276.52	1183.56	9.59282	8.81375	14.9549	14.7262	25.2644	25.2817	6.24753	6.05675	4.83136	4.80474
Bunda College	TVu-3550	59.6656	59.5582	104.384	104.298	12.7045	12.5051	1201.45	1118.61	10.9562	10.5734	14.4948	14.5585	24.2881	23.5469	8.44131	8.72761	5.19207	5.25616
Bunda College	TVu-361	52.7065	52.0671	100.196	99.5736	13.1912	13.2494	946.7	794.192	9.46115	8.76285	13.331	12.361	24.2939	23.7814	6.68584	6.59097	4.28645	4.14522
Bunda College	TVu-375	63.1446	63.3879	106.539	106.721	13.678	13.9279	1050.92	918.195	11.1746	10.7375	12.7811	11.529	22.8489	22.1734	6.31028	6.13391	4.68889	4.6379
Bunda College	TVu-387	59.5592	59.5951	104.105	104.081	14.3498	14.8339	1320.77	1263.71	10.4412	9.88418	11.4419	9.26454	22.8819	22.2454	6.40691	6.2711	4.59433	4.52258
Bunda College	TVu-391	58.012	57.8296	105.199	105.217	13.6186	13.7905	1862.95	1971.3	12.7411	12.7069	16.7528	17.3591	27.7246	29.2425	6.92871	6.87355	4.84972	4.83621
Bunda College	TVu-406	58.9093	58.7122	105.666	105.731	13.4608	13.5467	1750.49	1849	9.1678	8.36038	15.0003	14.9018	24.9215	24.3604	6.25672	6.0929	4.63034	4.55948
Bunda College	TVu-416	63.2269	63.2308	104.865	104.735	13.2375	13.2728	1409.04	1376.34	11.5904	11.2803	21.193	24.3318	25.0032	24.9697	7.06666	7.05011	4.96959	4.97701
Bunda College	TVu-4568	58.0895	57.7872	99.6783	98.9785	12.2336	11.8668	1662.12	1720.27	13.2469	13.2967	12.9065	11.6546	28.9073	31.4511	6.97872	6.94082	4.91516	4.91563
Bunda College	TVu-46	56.8111	56.2614	105.692	105.651	12.5849	12.3713	1394.02	1379.65	11.179	10.7834	17.9606	19.2805	24.8337	24.8837	7.4835	7.53579	4.9343	4.92854
Bunda College	TVu-692	61.4179	61.3925	103.159	103.007	11.096	10.2586	824.851	583.74	15.6835	16.2435	12.8962	11.1612	19.351	16.1334	7.59666	7.68023	5.41684	5.52551
Bunda College	TVu-81	65.6251	65.9505	105.124	105.1	12.6878	12.5057	2554.72	2971.57	8.57378	7.62435	21.1031	24.3003	33.1729	37.6527	5.67333	5.37764	3.97029	3.75299
Bunda College	TVu-972	54.855	54.4434	94.9118	93.6236	13.682	13.8721	1282.07	1241.39	7.84427	6.81494	13.295	12.1312	26.2486	27.0916	6.04728	5.83023	4.03094	3.83556
Bunda College	TVu-990	68.8453	69.1715	104.973	104.807	13.7725	14.0135	1200.86	1146.2	11.7477	11.5246	18.0092	19.6981	29.5595	32.7716	6.45293	6.30685	4.5921	4.50541
Bunda College	TVu-993	62.4077	62.6899	103.913	103.835	11.3632	10.6209	783.39	515.369	13.3874	13.5248	10.8484	7.8661	16.7024	12.4858	6.73068	6.64573	4.74659	4.70837
Bunda College	TVx-3236	62.4389	62.3882	104.976	104.903	11.3369	10.6361	1217.55	1146.05	9.09198	8.16489	17.1565	18.0586	24.1611	23.9032	6.64955	6.54552	4.43903	4.32317
Bunda College	TZcp34	61.6976	61.7268	96.1245	95.0131	14.9913	15.8514	1355.66	1373.75	10.9857	10.5991	21.8441	25.9732	25.6488	26.5045	6.48422	6.36664	4.52484	4.43898
Bunda College	TZcp43	56.9128	56.6606	102.802	102.606	13.9689	14.2613	1595.57	1575.47	12.875	12.8855	18.3694	19.498	27.0586	27.7834	8.2967	8.53467	5.34741	5.44921
Bunda College	TZcp5	58.4566	58.1841	95.7568	94.5584	15.4954	16.4815	1890.58	2002.07	15.2327	15.6541	19.8382	22.2511	25.8527	26.234	6.77086	6.68472	4.90881	4.88704
Bunda College	TZcp50	66.8883	67.1939	111.744	112.496	14.5174	15.0742	1331.5	1267.74	11.8202	11.5606	15.0868	14.9145	23.8242	23.4065	6.25942	6.05716	4.30772	4.1568
Bunda College	TZcp67	64.7313	64.9853	104.631	104.541	14.8717	15.6406	1091.21	997.422	14.2098	14.4216	16.8833	18.1138	19.0164	15.8278	7.52572	7.58523	4.97928	4.97586
Bunda College	TZcp70	58.4818	58.0814	103.837	103.622	15.9985	17.1236	1842.76	1995.69	12.0497	11.8311	18.4497	20.5907	26.3519	27.0381	6.51681	6.39523	4.62232	4.55997
Bunda College	TZcp84	87.5252	89.7663	117.715	119.282	10.3358	8.57199	487.157	-20.1327	17.2952	20.2509	9.7281	4.72738	13.7549	5.30661	9.05391	9.61355	6.20836	6.63658
Bunda College	TZcp95	59.2191	59.1118	104.079	103.922	14.7399	15.3175	1443.42	1369.81	10.7557	10.1973	17.4332	18.0134	27.7754	29.0235	7.01182	6.97179	4.93466	4.92675
Bunda College	UAM09-1046-6-1	57.9742	57.6916	106.334	106.438	12.243	11.8746	1560.51	1564.12	15.6554	16.2808	17.5257	18.8081	23.7755	23.273	7.98727	8.14231	5.37896	5.47672
Bunda College	UAM09-1051-1	57.896	57.5696	105.963	106.035	11.8444	11.3278	1799.17	1830.95	14.8711	15.225	17.3559	18.1598	24.9899	24.534	8.07592	8.24501	5.04961	5.07073
Bunda College	UAM14-126-19-2	55.7848	55.1492	104.148	103.888	11.7644	11.3096	1887.98	2079.78	19.7253	21.4744	18.4205	20.7407	26.9039	28.3621	8.40769	8.6425	5.65818	5.82003
Bunda College	V1-F3	57.0788	56.6752	100.444	99.8324	14.4874	15.0404	1651.84	1695.09	9.77502	9.01991	12.2551	10.1338	29.934	32.3127	6.06949	5.84288	4.42055	4.29788
Bunda College	V3-F0	57.1235	56.9696	100.567	100.047	14.372	14.8361	1942.19	2042.22	9.62587	8.88223	16.4886	16.7556	28.2417	29.399	6.57089	6.44368	4.7843	4.75418
Bunda College	Vuli-1	60.4179	60.3644	100.76	100.267	13.7921	13.9919	1604.44	1655.97	14.2283	14.5854	13.5115	12.3828	24.6536	24.9756	6.68136	6.59538	4.62434	4.56285
Bunda College	Vuli-2	59.2615	59.2444	100.776	100.263	14.8064	15.455	2432.7	2757.37	10.0944	9.40139	18.7978	20.5437	33.5151	38.4729	5.97821	5.74313	4.5649	4.49002
Bunda College	Vuli-AR 1	57.2079	56.792	106.748	106.907	13.1749	13.156	1480.93	1513.47	11.6368	11.3786	16.5977	17.1504	24.8712	25.084	7.09613	7.08208	4.81357	4.78199
Bunda College	Vuli-AR 2	58.232	57.8455	107.191	107.28	12.9471	12.9083	1308.92	1250.68	13.3642	13.4548	15.7285	16.0116	23.4577	23.3404	6.84366	6.75974	4.76207	4.70219
Chitedze Research Station	Aloka Local	61.9888	60.3022	84.8175	90.3896	14.2357	13.4783	2429.82	1750.02	14.8087	13.3845	27.3408	30.4395	26.1035	23.8024	7.09811	7.01244	5.04921	4.9409
Chitedze Research Station	B301	63.1502	63.3703	81.9867	82.1076	14.2621	13.6067	2708.09	2842.39	14.387	12.4781	27.2578	26.6183	24.8932	17.75	6.39645	5.21397	4.71453	3.95937
Chitedze Research Station	Danila	61.5189	58.7479	81.3204	79.5441	14.2648	13.6998	2523.55	2070.28	16.0415	16.2865	27.3302	29.9624	26.9074	27.5982	7.43153	7.72446	5.26173	5.45495
Chitedze Research Station	Fahari	63.5379	64.1423	82.836	84.0568	14.3092	14.262	2537.48	2236.47	15.0808	13.8749	27.2101	24.9241	26.261	23.3675	7.0691	6.92089	5.01015	4.81035
Chitedze Research Station	GUARIBA	61.3103	58.4249	80.5281	77.9505	14.3342	14.4064	3013.72	3967.73	15.5737	15.1996	27.3217	29.4124	29.3262	37.6753	7.05653	6.9198	5.11871	5.11293
Chitedze Research Station	INIA - 36	62.5504	61.6721	81.1282	79.6225	14.3894	15.1056	2707.29	2864.9	16.1058	16.497	27.3657	31.5762	30.0827	40.2497	7.30925	7.43707	5.14145	5.10742
Chitedze Research Station	INIA - 73	61.827	59.8424	80.6559	77.9458	14.1659	12.9715	2675.71	2780.75	16.08	16.2781	27.1926	23.7478	25.9415	22.9519	7.15477	7.08356	5.12078	5.10828
Chitedze Research Station	IT-18	63.395	63.591	81.5968	80.4705	14.3597	14.7398	2935.86	3657.51	16.9683	18.39	27.3185	29.6591	28.9148	36.245	7.38445	7.67276	5.25413	5.47136
Chitedze Research Station	IT00K-1263	62.6764	61.936	81.3913	80.0472	14.3542	14.6149	2967.3	3814.01	14.2442	12.2459	27.2762	27.5538	28.1604	32.8072	6.82268	6.26347	4.86118	4.38253
Chitedze Research Station	IT04K-108	62.7607	62.2919	81.3773	80.303	14.3396	14.2506	2793.32	3064.87	15.4599	15.0666	27.2858	27.8944	27.4364	29.4656	7.07508	6.87323	5.02681	4.80745
Chitedze Research Station	IT04K-227-4	61.2979	57.0168	80.1379	76.4327	14.4756	15.6211	2360.84	1477.39	17.809	20.0995	27.2774	27.7481	28.6085	34.4674	8.00789	9.07079	5.53718	6.18482
Chitedze Research Station	IT04K-321-1	61.725	59.4507	80.2512	76.6093	14.2987	14.1814	2999.48	3889.33	14.2785	12.2817	27.3345	30.2377	28.289	33.5138	7.10338	6.96856	5.15045	5.16909
Chitedze Research Station	IT06K-108	62.2264	60.7166	80.4767	76.8657	14.2891	14.1041	2621.25	2431.09	15.4376	14.9375	27.2763	27.5559	27.2255	28.2446	7.09383	7.0199	5.11007	5.12333
Chitedze Research Station	IT07K-210-1-1	62.3477	60.9692	80.3884	76.9299	14.298	14.2783	2567.47	2245.7	15.2415	14.5733	27.2785	27.6553	28.6836	34.4845	7.45081	7.8009	5.11682	5.091
Chitedze Research Station	IT07K-230-2-9	63.2542	63.0595	81.1546	78.8298	14.272	13.674	2832.37	3234.23	16.0868	16.221	27.3032	28.641	28.6947	34.1148	7.45588	7.79487	5.44877	5.95003
Chitedze Research Station	IT07K-297-13	61.1006	57.9079	80.0375	76.1736	14.4193	15.2607	2423.22	1834.07	16.1843	16.6777	27.3324	30.1519	26.8909	27.4324	7.54338	8.05673	5.15654	5.23
Chitedze Research Station	IT07K-299-6	62.3647	61.0832	81.9591	82.4814	14.3849	14.7421	2753.14	3012.68	16.2945	16.8153	27.4042	33.0974	28.5938	34.0061	7.21154	7.21117	5.14177	5.12466
Chitedze Research Station	IT07K-318-33	61.7178	59.5234	82.4566	83.435	14.235	13.5717	2644.6	2542.49	15.5087	15.1366	27.296	28.6844	27.925	31.5481	7.25653	7.32385	5.10346	5.04229
Chitedze Research Station	IT08K-150-12	61.2549	58.1975	81.3209	79.6294	14.3327	14.4168	2881.55	3432.35	16.7356	17.6755	27.2736	27.3648	27.883	31.1699	7.41061	7.72484	5.28756	5.54682
Chitedze Research Station	IT08K-180-11	62.0675	60.373	81.9086	81.601	14.3387	14.5823	2742.04	2970.07	16.3786	17.185	27.3441	30.586	27.0245	26.718	7.23546	7.24336	5.20858	5.26999
Chitedze Research Station	IT09K-227-9	62.2136	60.7741	81.5285	80.8081	14.3062	14.2245	3018.26	3952.18	15.315	14.6156	27.3057	29.002	27.1438	28.6055	7.41043	7.64185	5.24846	5.40842
Chitedze Research Station	IT10K-817-1A	62.3666	60.9285	80.968	78.6746	14.2939	13.9857	2945.84	3751.45	16.1155	16.4161	27.4058	33.5152	28.4776	34.4999	6.96959	6.61774	5.05552	4.87658
Chitedze Research Station	IT10K-817-1B	63.5202	63.7804	82.9148	84.7737	14.2617	13.5334	2763.58	3049.35	15.6059	15.3046	27.1839	23.2308	28.8772	35.4246	7.41014	7.71837	5.17004	5.2166
Chitedze Research Station	IT10K-817-3	62.4812	61.1916	82.2698	82.6118	14.3803	14.857	2718.62	2795.26	16.6953	17.7405	27.2702	27.1764	26.5697	26.7065	7.5022	7.83264	5.34868	5.65166
Chitedze Research Station	IT10K-817-7	62.4811	61.6012	80.2657	77.2011	14.2082	13.2009	2887.18	3438.76	16.0292	16.2663	27.2798	28.0124	27.156	28.2602	7.30456	7.62926	5.15737	5.28169
Chitedze Research Station	IT10K-834-3	62.1154	60.4766	82.626	84.0891	14.2447	13.5233	2990.16	3744.04	17.3706	19.1212	27.2329	25.5081	29.0384	37.1195	7.46152	7.79565	5.11596	5.0781
Chitedze Research Station	IT10K-973-1	61.3412	58.6424	80.147	76.818	14.3425	14.5031	2564.43	2240.3	17.4591	19.5083	27.3233	29.5338	27.0592	27.4617	7.69748	8.43989	5.51017	6.16458
Chitedze Research Station	IT10K-985-3	62.2884	60.8504	84.2674	88.6913	14.3502	14.5868	2601.91	2472.35	16.5508	17.405	27.3084	29.1166	26.5927	26.4626	7.62182	8.20712	5.27367	5.50748
Chitedze Research Station	IT13K-1079-3	62.9547	62.7126	81.9454	82.141	14.4572	15.7576	2576.25	2275.67	17.8797	20.3064	27.2661	27.0478	26.959	26.84	7.52167	7.89015	5.29802	5.50452
Chitedze Research Station	IT82E-16	61.1512	57.7722	81.1226	78.9515	14.3956	15.0375	2772.03	3028	13.8291	11.3503	27.2035	24.3529	28.3797	34.9721	6.92485	6.47544	5.08865	4.98665
Chitedze Research Station	IT835-728-5	61.4269	58.6986	81.0197	79.2924	14.4292	15.2084	2438.25	1782.05	15.2812	14.646	27.288	28.0758	27.2436	29.4933	6.96574	6.58125	5.13846	5.12817
Chitedze Research Station	IT90K-76	62.2227	60.9396	81.0136	78.7801	14.3249	14.5212	2947.73	3688.37	18.0262	20.6767	27.3466	30.7558	27.5029	29.4137	7.21352	7.23991	5.27505	5.52179
Chitedze Research Station	IT93K-452-1	61.3893	58.2869	79.0938	72.9594	14.2317	13.1625	2500.84	1884.41	14.8944	13.6229	27.2933	28.3776	27.3837	27.4985	6.86043	6.39763	4.91608	4.57577
Chitedze Research Station	IT97K-1069-6	64.2805	66.069	79.9975	73.5515	14.2424	13.2166	2680.96	2678.79	15.7034	15.564	27.4196	33.9004	28.8072	34.7704	6.01262	4.38672	4.37336	3.08348
Chitedze Research Station	IT97K-390-2	63.6096	64.488	81.8888	81.9531	14.2472	13.5282	2852.15	3363.57	17.399	19.2474	27.2989	28.3786	25.8304	22.6062	7.32247	7.5071	5.33148	5.67189
Chitedze Research Station	IT97K-499-35	61.6838	59.2672	80.1896	76.7011	14.305	14.0347	2639.14	2589.9	16.2177	16.6295	27.2414	25.8257	26.6393	26.6281	7.69779	8.38383	5.30882	5.60192
Chitedze Research Station	IT98K-131-2	62.1514	60.5202	81.2748	79.9321	14.33	14.2035	2515.56	2114.6	16.2139	16.6686	27.3412	30.5811	26.5071	25.2997	7.22592	7.28489	5.19608	5.3241
Chitedze Research Station	IT98K-205-8	61.6114	58.8733	81.2144	79.2171	14.2727	13.7253	2437.61	1793.1	15.5999	15.1824	27.271	27.203	26.0376	23.7596	7.41775	7.66931	5.17304	5.19902
Chitedze Research Station	IT98K-390-2	63.0273	62.7416	81.3379	79.6128	14.3288	14.1785	2530.51	2036.51	14.9725	13.7724	27.195	23.792	26.7505	26.3308	7.1865	7.12885	5.18184	5.27134
Chitedze Research Station	IT98K-503-1	61.0353	57.6922	80.1123	75.944	14.3085	14.2059	2676.15	2732.96	16.6371	17.6164	27.3386	30.4157	28.8078	35.6565	7.37328	7.59979	5.21054	5.33348
Chitedze Research Station	IT99k-1122	61.9365	59.8102	81.5235	80.0869	14.3382	14.3658	2655.47	2558.2	15.318	14.5084	27.2459	26.2148	26.6209	26.4486	6.88049	6.3756	4.93828	4.59172
Chitedze Research Station	IT99K-241-2	63.3378	63.4752	80.6704	77.6359	14.3243	14.0819	2714.38	2754.62	16.6592	17.4154	27.2627	26.806	27.2234	29.0431	7.0308	6.65148	5.15885	5.09827
Chitedze Research Station	IT99K-407-8	60.6731	56.8332	80.3752	76.9377	14.2107	13.0233	2747.12	3002.03	14.7419	13.3787	27.2069	24.6326	26.3287	25.5993	7.36846	7.53016	5.27681	5.45053
Chitedze Research Station	IT99K-409-8	61.6451	59.258	81.0886	79.2402	14.3713	14.8714	2857.72	3367.78	14.9437	13.8484	27.3418	30.4047	27.6957	30.6651	7.1606	7.17334	5.13494	5.19896
Chitedze Research Station	IT99K-529-1	62.7463	61.7962	82.2991	82.2192	14.2392	13.5671	2495.34	1986.44	14.5378	12.854	27.0703	18.6423	27.0991	27.9669	7.06909	6.86987	4.98382	4.71981
Chitedze Research Station	IT99K-573-1-1	62.0619	60.1722	80.7172	77.5559	14.3929	14.7683	2551.56	2198.36	16.9109	18.1504	27.2325	25.6323	26.3444	24.8967	7.30042	7.43836	5.20772	5.35973
Chitedze Research Station	IT99K-573-2-1	63.1305	62.9758	83.101	85.2406	14.1928	13.1283	2644.33	2591.31	17.2019	18.688	27.3581	31.4016	28.8905	35.9704	7.3726	7.63921	5.28017	5.54647
Chitedze Research Station	IT99K-7-21-2-2-1	62.7682	62.4708	82.7061	84.8048	14.2255	13.3179	2656.36	2511.72	16.3642	17.1017	27.2943	28.0768	26.6531	26.086	7.37239	7.56085	5.2426	5.37233
Chitedze Research Station	Mkanakaufiti	62.8826	62.9065	80.8281	79.2632	14.1667	12.8015	2560.19	2192.52	14.8034	13.6296	27.1982	23.9089	27.4584	29.2458	7.25349	7.31299	5.13502	5.11669
Chitedze Research Station	MWcp03	63.3041	63.5079	81.9629	81.6038	14.2942	13.8205	2872.65	3473.49	20.4528	25.882	27.3037	28.6578	26.2586	24.9343	7.61889	8.19319	5.39899	5.84074
Chitedze Research Station	MWcp04	63.1999	63.2583	82.0847	82.1479	14.3524	14.5014	2617.01	2503.8	18.6603	21.9656	27.2844	27.9476	27.1356	28.3333	7.36034	7.5904	5.30011	5.58861
Chitedze Research Station	MWcp05	65.8583	69.8572	84.4069	88.9096	14.339	14.2339	2550.82	2216.16	17.9241	20.4537	27.1715	22.9075	26.0295	22.7589	7.64086	8.26256	5.40979	5.88808
Chitedze Research Station	MWcp06	62.1009	60.565	81.0804	79.2744	14.0984	11.9851	2651.54	2664.57	16.9254	18.5296	27.2596	26.7428	26.7	26.6785	7.40699	7.74113	5.24898	5.46649
Chitedze Research Station	MWcp07	63.1981	62.9293	81.9338	81.0953	14.3476	14.6611	2743.93	3007.73	16.3068	16.8395	27.1668	23.1688	25.331	21.02	7.38354	7.68237	5.35874	5.76094
Chitedze Research Station	MWcp08	62.3529	60.8087	82.0236	81.1908	14.2933	14.0429	3029.06	3941.47	17.2531	18.9949	27.3117	29.1244	28.6225	34.1342	7.16609	7.17182	5.27279	5.5732
Chitedze Research Station	MWcp09	67.1662	73.1252	85.8316	93.1319	14.2836	13.8333	2456.55	1876.15	18.6434	22.0292	27.1666	22.9799	23.3967	12.0761	7.93324	8.9462	5.36243	5.72813
Chitedze Research Station	MWcp10	65.0782	67.6325	84.2174	87.7675	14.4123	15.1172	2538.97	2180.13	16.997	18.2759	27.3556	31.2465	26.1103	23.7835	7.59434	8.09504	5.2985	5.54664
Chitedze Research Station	MWcp11	62.4992	61.3125	81.0312	79.0115	14.4743	15.8586	3013.91	3996.39	16.1238	16.2983	27.4938	37.373	29.1791	37.4695	7.57787	8.07206	5.28133	5.51475
Chitedze Research Station	MWcp15	62.7567	61.9001	82.1671	82.1778	14.4285	15.2883	2371.75	1600.78	14.8506	13.0444	27.1068	20.0905	25.7512	23.1617	7.49829	7.87554	5.17013	5.21771
Chitedze Research Station	MWcp17	61.2701	58.2435	79.6167	74.6304	14.3683	14.8862	2245.17	1078.14	16.8574	17.9475	27.2146	24.8558	26.1192	23.1711	7.87366	8.81698	5.41621	5.95289
Chitedze Research Station	MWcp18	63.0336	62.7241	81.9465	81.7361	14.267	13.7867	2946.63	3752.64	14.9952	13.8663	27.195	24.1024	27.4687	30.1094	6.66973	5.94634	5.07938	4.96438
Chitedze Research Station	MWcp19	61.9525	60.2395	80.3726	77.4837	14.3684	14.8696	2745.11	2918.48	16.0229	16.0789	27.2565	26.5933	26.5642	25.2023	7.31565	7.45499	5.3609	5.73915
Chitedze Research Station	MWcp20	62.1545	60.6658	80.1519	76.5239	14.2337	13.5236	2795.63	3158.89	16.9192	18.407	27.4377	38.4911	26.5466	24.1268	7.42959	7.94107	5.2406	5.53469
Chitedze Research Station	MWcp21	65.4201	68.5795	83.9975	87.1047	14.397	14.9757	2284.51	1152.67	16.6038	17.8569	27.2575	26.7546	25.4931	21.6491	7.04419	6.79815	5.11347	5.06335
Chitedze Research Station	MWcp2227	62.8327	62.4495	82.0164	82.301	14.3436	14.5088	3002.92	3881.5	13.7616	11.3589	27.3178	29.4935	27.6053	29.4813	6.90229	6.51187	4.86481	4.41958
Chitedze Research Station	MWcp2232	62.0038	59.9979	80.6337	77.8244	14.234	13.3777	2951.44	3711.66	14.4707	12.887	27.2795	27.6089	26.3922	25.4775	6.73232	6.04994	4.99134	4.70463
Chitedze Research Station	MWcp23	62.7329	61.8423	81.4528	80.069	14.4656	15.7424	2780.8	2991.71	16.2766	16.5833	27.2285	25.5016	27.167	28.2118	7.52877	7.91409	5.29251	5.50699
Chitedze Research Station	MWcp24	66.5125	71.8114	84.3895	89.0231	14.4416	15.4056	3201.82	4569.67	20.8343	26.8635	27.2551	26.5541	27.0729	26.8995	7.62356	8.22054	5.6101	6.39051
Chitedze Research Station	MWcp25	61.9602	59.9777	80.715	78.1684	14.3749	14.7708	2973.91	3799.11	16.2307	16.655	27.2632	27.0005	27.3382	29.2808	7.34243	7.52848	5.27387	5.49591
Chitedze Research Station	MWcp26	67.8909	75.1719	86.3962	94.5083	14.2626	13.5114	2411.09	1672.19	20.8423	26.9728	27.2476	26.1544	25.2722	19.8899	7.96867	9.01157	5.46251	5.97935
Chitedze Research Station	MWcp27	62.5508	61.6842	82.3517	82.9803	14.3681	14.733	2432.24	1773.91	14.3956	11.8207	27.3739	32.0447	28.8374	35.2425	6.88354	6.40804	4.92891	4.5278
Chitedze Research Station	MWcp28	61.6611	59.147	80.9253	78.5902	14.4679	15.6262	2549.1	2211.35	15.4092	15.0651	27.2009	24.3721	27.8433	30.6629	7.4442	7.83476	5.24552	5.4664
Chitedze Research Station	MWcp29	65.0157	67.5967	83.8573	86.7632	14.2241	13.1089	2677.55	2690.02	16.2483	16.5234	27.4067	33.3688	25.1493	20.0039	7.85342	8.7115	5.6469	6.47752
Chitedze Research Station	MWcp30	62.734	62.2585	81.4601	80.7078	14.5327	16.6416	2678.63	2753.65	15.2201	14.5094	27.282	27.7907	27.0379	28.1863	7.29161	7.42578	5.06438	4.94833
Chitedze Research Station	MWcp305	61.4969	58.7232	80.368	77.0471	14.3673	14.5819	2869.81	3500.77	15.0086	14.035	27.3151	29.5243	28.0663	31.997	7.10529	6.96142	5.07931	4.93276
Chitedze Research Station	MWcp309	62.9908	62.4029	81.3402	79.367	14.4938	16.1123	2877.68	3494.9	15.806	15.8048	27.2161	24.8775	27.7103	30.2558	6.89665	6.51559	5.07256	4.9748
Chitedze Research Station	MWcp31	66.652	71.9806	84.2418	88.2037	14.37	15.0331	2626.57	2523.95	15.8932	15.8162	27.2243	25.5609	25.2656	20.3377	7.91641	8.84114	5.45355	5.95479
Chitedze Research Station	MWcp32	62.6501	61.7645	81.8352	81.3983	14.3309	14.1473	2614.2	2461.95	17.4723	19.4669	27.2703	27.4398	25.3899	21.1745	7.51607	7.93788	5.39391	5.84266
Chitedze Research Station	MWcp3254	63.5173	63.8798	80.7369	77.7502	14.2895	14.0573	2737.92	2984.56	17.2288	18.8572	27.3764	32.1495	26.9288	26.7229	7.44286	7.81086	5.31983	5.63555
Chitedze Research Station	MWcp33	63.6377	64.1091	82.6189	83.9	14.2633	13.5306	2821.89	3344.66	17.662	19.8555	27.2016	24.4773	23.1996	12.2957	7.91948	8.90715	5.59168	6.30169
Chitedze Research Station	MWcp34	62.0514	60.0861	81.4544	79.8157	14.272	13.7391	2757.19	2907.34	16.9357	18.0466	27.2283	25.3024	26.5525	25.7773	7.91371	8.87359	5.44836	5.97639
Chitedze Research Station	MWcp35	66.4403	71.4314	85.6779	92.2608	14.2861	13.6463	2510.35	2127.74	19.5848	24.2358	27.1238	20.9062	26.8015	27.8391	8.06804	9.25592	5.63593	6.47447
Chitedze Research Station	MWcp36	66.4382	71.4147	85.9955	93.6541	14.4338	15.4177	2585.29	2309.46	17.8421	20.2242	27.2932	28.3999	26.1134	23.9779	6.79787	6.21021	4.9353	4.57129
Chitedze Research Station	MWcp37	67.7237	74.822	85.8522	93.1504	14.3401	14.4204	2424.41	1753.38	16.5203	17.9132	27.0961	19.5389	25.0629	19.1569	7.51913	7.9745	5.4718	6.04601
Chitedze Research Station	MWcp38	63.4797	64.0195	82.4868	83.3818	14.4185	15.0826	2596.24	2461.16	16.3926	17.0564	27.2578	26.5744	27.0305	27.7229	7.55341	7.96872	5.2406	5.36819
Chitedze Research Station	MWcp39	62.9438	62.5959	81.3934	80.0185	14.395	15.189	3024.3	3949.89	15.766	15.5228	27.201	24.0141	27.3749	28.8862	7.40994	7.69959	5.35268	5.71904
Chitedze Research Station	MWcp40	66.1652	70.6922	84.3242	88.6946	14.3728	14.6683	2300.55	1229.35	15.5216	15.2203	27.1983	24.2109	25.4679	21.5153	7.41388	7.71041	5.32511	5.60953
Chitedze Research Station	MWcp41	62.885	62.4945	84.1838	88.276	14.4264	15.3067	2881.48	3526.76	15.4548	14.8977	27.1719	23.0452	28.1517	32.7037	7.32039	7.45773	5.28515	5.51143
Chitedze Research Station	MWcp43	67.1335	73.0165	84.628	89.3233	14.4328	15.5522	2703.98	2762.94	15.9007	16.018	27.3732	31.6505	25.3226	19.6973	7.58684	8.06114	5.15437	5.11894
Chitedze Research Station	MWcp44	63.9707	65.4495	83.7064	87.0409	14.2373	13.2504	2494.69	1942.03	17.5039	19.4902	27.271	27.2176	26.4096	23.9443	7.65536	8.3019	5.47628	6.0676
Chitedze Research Station	MWcp45	64.6038	66.777	81.7174	81.1519	14.4692	15.6925	2773.73	3030.67	18.0942	20.8082	27.2806	27.666	25.959	23.4635	7.67631	8.32137	5.4817	6.03145
Chitedze Research Station	MWcp46	67.1299	73.308	85.2626	91.3768	14.5323	16.1286	2711.71	2907.98	18.1207	20.9422	27.1963	24.0137	25.2028	19.5041	7.50848	7.91773	5.26832	5.4653
Chitedze Research Station	MWcp47	62.8964	62.563	80.7627	78.6746	14.3902	14.9271	3012.34	3992.66	17.2346	18.9188	27.2873	28.2179	29.018	36.5524	7.29207	7.36944	5.28285	5.51497
Chitedze Research Station	MWcp479	63.8922	65.385	81.446	80.5453	14.175	12.7542	2857.75	3598.16	15.7443	15.3418	27.2202	25.0846	28.6174	34.532	7.34786	7.51023	5.25274	5.43297
Chitedze Research Station	MWcp48	69.0401	78.0468	87.7688	99.1109	14.479	15.8202	2516.23	1999.55	17.5188	19.5497	27.2304	25.8184	26.1039	23.4647	8.01965	9.1303	5.69972	6.61688
Chitedze Research Station	MWcp49	60.4545	56.3164	80.5206	77.2703	14.2322	13.007	2529.68	2074.78	18.345	21.3805	27.2075	24.4488	27.5109	29.1954	7.87457	8.81342	5.63174	6.50041
Chitedze Research Station	MWcp50	67.0946	73.1447	85.3032	91.6688	14.4093	15.2384	2394.86	1623.37	17.9889	20.358	27.2485	26.3124	25.2428	20.4358	7.83968	8.61536	5.55841	6.16784
Chitedze Research Station	MWcp51	63.2117	63.3828	81.6369	80.9456	14.4636	15.7536	2885.89	3497.35	16.2405	16.5215	27.2876	28.3513	28.4799	33.9114	7.44319	7.78838	5.2257	5.39669
Chitedze Research Station	MWcp52	64.5261	66.8935	83.7112	87.3903	14.2852	13.7434	2707.56	2831.68	15.9069	15.9818	27.1844	23.627	27.4174	28.8791	7.13143	7.01423	5.08639	4.99254
Chitedze Research Station	MWcp53	67.484	73.7817	86.0371	93.6271	14.4298	15.2727	2328.57	1379.29	19.3528	23.4507	27.2987	28.6283	25.514	21.3463	7.58179	8.1085	5.50715	6.14512
Chitedze Research Station	MWcp54	67.084	73.3341	84.9582	90.9056	14.2586	13.6074	2642.02	2618.53	18.1686	20.9926	27.1941	23.851	25.325	20.2385	7.29299	7.41862	5.26562	5.46397
Chitedze Research Station	MWcp55	62.3188	60.8056	81.0151	78.5863	14.3078	14.1303	2560.13	2291.49	15.1827	13.8197	27.3029	28.7693	28.3608	32.7648	7.49505	7.82845	5.21824	5.3174
Chitedze Research Station	MWcp57	64.1581	65.3177	83.3447	85.4267	14.3164	14.1185	2771.63	3056.34	16.6211	17.4516	27.3199	29.6668	25.8448	21.5209	7.44678	7.74253	5.37575	5.757
Chitedze Research Station	MWcp58	64.7974	67.3036	83.6103	86.5126	14.2943	14.013	2759.53	3030.95	16.1165	16.3551	27.2986	28.4265	28.9334	37.3155	6.88069	6.3607	5.48183	6.03248
Chitedze Research Station	MWcp59	62.3983	61.1281	80.9876	78.5448	14.3839	14.9594	2858.55	3374.79	16.8661	18.1749	27.3276	29.8194	26.4423	24.7922	7.69659	8.3835	5.52453	6.19435
Chitedze Research Station	MWcp60	64.6837	66.9329	83.1784	85.1626	14.3303	14.2521	2727.5	2812.97	20.2107	25.3388	27.4006	32.9732	26.3216	24.3358	7.51022	7.92932	5.64746	6.5167
Chitedze Research Station	MWcp601	61.8612	59.7905	81.5945	80.7544	14.4055	15.2035	2916.18	3592.59	15.003	13.9174	27.3853	32.532	26.3136	24.8261	6.98287	6.65641	5.15116	5.13756
Chitedze Research Station	MWcp61	65.4403	68.782	83.7144	86.4527	14.3418	14.2758	2737.04	2875.34	16.8953	18.1665	27.1594	22.5209	26.0194	22.1286	7.3461	7.55499	5.30219	5.60641
Chitedze Research Station	MWcp62	67.0919	72.9854	84.7464	89.6735	14.35	14.5449	2527.9	2115.24	17.1718	18.8436	27.2244	25.266	25.5088	21.5436	7.97425	9.0631	5.51277	6.15294
Chitedze Research Station	MWcp63	63.723	64.1067	85.0856	92.8632	14.3209	14.3311	2711.46	2674.03	18.3167	21.1085	27.3616	31.1653	25.9933	22.4403	7.46442	7.77568	5.91117	7.18268
Chitedze Research Station	MWcp64	68.6038	76.9114	87.366	97.5242	14.593	17.0427	2326.54	1397.38	21.9903	29.31	27.3849	32.26	26.3435	25.3269	8.48193	10.2558	5.87988	7.14938
Chitedze Research Station	MWcp645	60.9795	57.489	79.7495	75.1136	14.4003	15.0503	2573.55	2310.94	14.694	13.1637	27.1784	23.3377	25.8226	23.5788	7.2413	7.27727	5.13853	5.12055
Chitedze Research Station	MWcp65	62.0748	60.2977	82.1014	82.1281	14.5223	16.3195	2408.78	1665.99	20.084	24.948	27.2045	24.7348	26.1194	22.9275	7.88869	8.79985	5.49009	6.06879
Chitedze Research Station	MWcp66	62.0238	60.2905	81.512	80.6749	14.296	14.0329	2874.65	3350.85	15.6522	15.4709	27.2849	28.1606	27.2979	28.4095	7.04771	6.82862	5.23161	5.36202
Chitedze Research Station	MWcp67	63.3771	64.0833	82.0732	82.7821	14.3025	14.1001	2762.83	3176.98	16.3797	17.6283	27.2141	23.6103	25.7786	20.4898	7.14477	7.08905	5.10725	5.03546
Chitedze Research Station	MWcp68	65.0973	67.9849	83.4383	85.5303	14.1885	12.8147	2626.73	2456.88	17.0752	18.5999	27.1975	24.2196	24.9305	18.4326	7.39243	7.64341	5.25238	5.44862
Chitedze Research Station	MWcp69	66.8378	72.7218	85.3505	92.3155	14.417	15.215	2426.2	1783.16	19.5823	24.0547	27.3428	30.6269	25.9476	22.2879	7.9381	8.85438	5.55682	6.17741
Chitedze Research Station	MWcp71	66.0864	70.733	84.6393	89.9727	14.4767	15.7088	2484.74	1996.48	17.0336	18.4605	27.1985	24.2165	26.4094	25.4211	7.6572	8.27454	5.34266	5.65428
Chitedze Research Station	MWcp72	67.2114	73.3324	83.1821	84.7869	14.2279	13.1627	2356.21	1430.78	17.2181	18.8051	27.2115	24.5987	26.2072	24.0579	8.08312	9.27359	5.71125	6.71389
Chitedze Research Station	MWcp73	67.2363	73.4683	83.8191	87.1977	14.3053	14.3337	2410.12	1711.74	17.2037	18.7183	27.3287	29.7914	23.8704	14.751	7.38402	7.60096	5.17119	5.21424
Chitedze Research Station	MWcp76	59.5944	53.8811	80.3188	76.6553	14.4661	15.6248	2550.74	2126.05	16.0668	16.2876	27.2176	24.9042	26.8775	26.3906	7.18856	7.13779	5.15089	5.15817
Chitedze Research Station	MWcp91	67.5327	74.3587	84.0093	87.7846	14.4072	15.0827	2662.51	2576.33	16.7102	17.7631	27.2138	24.6059	24.9304	19.2502	7.18848	7.18025	5.3022	5.59101
Chitedze Research Station	MZcp 004	63.2356	63.1807	82.0015	81.3741	14.4329	15.4072	2750.17	2959.79	15.9185	15.9825	27.2866	27.9867	26.2674	24.7106	7.09868	6.96912	5.1622	5.21666
Chitedze Research Station	MZcp 011	62.9556	62.6411	82.1408	82.2813	14.3533	14.5076	2696.68	2709.55	15.9667	15.9074	27.3138	28.9337	26.8509	27.1173	7.0281	6.74135	5.15653	5.13153
Chitedze Research Station	MZcp 012	62.9356	62.5107	81.8732	81.0339	14.2898	13.803	2392.11	1531.59	15.6492	15.4794	27.2452	26.1639	26.0478	23.5047	7.1275	6.97121	5.1604	5.13996
Chitedze Research Station	MZcp 013	63.0342	62.7355	81.5312	80.4057	14.4049	15.211	2623.22	2515.2	14.8708	13.6377	27.369	31.7138	25.5287	21.0819	7.43226	7.72135	5.15141	5.18399
Chitedze Research Station	MZcp 014	65.1956	68.4384	83.7148	87.0107	14.4143	15.128	2946.61	3659.3	13.5887	10.8141	27.2535	26.5627	26.6926	26.078	6.88213	6.4281	5.02201	4.82088
Chitedze Research Station	MZcp 015	64.6976	67.1196	83.4248	86.2129	14.3843	14.8374	2545.68	2202.84	18.9412	22.9142	27.2391	25.7767	27.2273	29.2404	7.60499	8.20964	5.42819	5.94193
Chitedze Research Station	MZcp 016	64.4869	66.6115	83.694	86.9843	14.408	15.0571	2654.83	2589.23	15.859	15.928	27.202	24.1667	26.4335	25.1723	7.27331	7.38967	5.28772	5.52761
Chitedze Research Station	MZcp 020	63.7395	64.6496	82.659	83.7234	14.1425	12.5472	2717.93	2925.91	18.9163	22.7946	27.3578	31.3321	25.9629	23.2763	7.51542	7.94381	4.7584	4.11101
Chitedze Research Station	MZcp 021	64.9795	67.7731	83.2982	85.7292	14.3307	14.5288	2867.34	3443.92	17.0959	18.5853	27.3095	28.9177	26.3531	24.8729	7.24928	7.36122	5.10978	5.12081
Chitedze Research Station	MZcp 022	64.6521	67.0369	81.2882	79.6646	14.3332	14.092	2849.41	3350.93	15.4661	15.1537	27.2782	27.4133	26.4842	24.9637	7.21796	7.25342	5.06517	4.96466
Chitedze Research Station	MZcp 023	62.7295	61.8861	84.8679	89.9426	14.4993	15.9544	2642.16	2530.84	16.0452	16.149	27.2004	24.0999	27.1469	28.6765	6.99263	6.69661	5.04835	4.88391
Chitedze Research Station	MZcp 024	63.9207	65.2398	82.8726	84.9315	14.4609	15.6445	2798.21	3134.92	18.0297	20.8126	27.2921	28.4828	27.3053	28.4149	7.36742	7.50793	5.39166	5.72456
Chitedze Research Station	MZcp 025	65.3291	68.4734	82.7528	83.9817	14.4091	15.2146	2793.93	3092.55	16.8205	17.8248	27.3179	29.6335	26.0974	24.2174	7.24917	7.29124	5.24956	5.44254
Chitedze Research Station	MZcp 026	64.026	64.9817	82.8167	83.6255	14.2898	13.7514	2627.38	2500.8	18.2164	21.1052	27.1905	23.6643	28.3252	33.4611	7.54737	8.02542	5.28746	5.54791
Chitedze Research Station	MZcp 030	66.562	71.8795	85.4051	92.0585	14.3222	14.178	2713.78	2829.9	15.0681	14.2742	27.1874	23.4007	26.1919	24.5728	6.89778	6.4801	5.11817	5.09236
Chitedze Research Station	MZcp 032	63.2147	63.2802	80.9617	78.9739	14.1611	12.7391	2487.17	1984.79	14.9746	13.9406	27.3192	29.623	24.4406	16.2658	7.3607	7.55942	5.13973	5.11043
Chitedze Research Station	MZcp 044	67.6293	78.0145	85.0928	90.7228	14.2127	13.2556	2672.45	2674.19	16.5132	17.3489	27.2935	28.6017	26.7118	27.0168	7.17875	7.15464	5.19598	5.33144
Chitedze Research Station	MZcp 045	63.3234	63.4297	81.3674	79.7411	14.2574	13.5972	2670.14	2544.64	14.4743	12.7172	27.2416	25.9327	27.976	31.4078	6.78876	6.27591	4.90557	4.5821
Chitedze Research Station	MZcp 046	62.1061	60.5456	80.1534	76.7311	14.3028	14.165	2787.08	3079.39	14.4807	12.5943	27.2539	26.7415	28.8979	35.2534	6.54701	5.61233	4.79788	4.2028
Chitedze Research Station	Raha 1	64.1407	65.4586	82.5365	83.4499	14.2614	13.7556	3004.47	3843.84	15.3473	14.7233	27.3242	29.9542	27.9126	31.5497	7.06609	6.82445	5.07528	4.93048
Chitedze Research Station	Raha 2	63.1659	63.2239	80.7863	78.2576	14.2712	13.6773	2689.89	2743.54	14.7531	13.2266	27.2298	25.4277	26.1273	22.6581	7.23713	7.18732	5.20264	5.25078
Chitedze Research Station	Sanzi	59.8803	55.0114	78.9955	73.3962	14.2596	13.4956	2660.07	2586.03	14.7491	13.652	27.2712	27.3464	26.8219	26.7783	7.08352	6.99721	4.99203	4.78394
Chitedze Research Station	Sudan-1	61.7649	59.678	81.9213	82.1165	14.2096	13.2736	2584.09	2287.78	13.9518	11.5943	27.3598	31.3799	27.551	29.2847	6.77227	6.21304	4.81885	4.30375
Chitedze Research Station	Tumaini	61.095	57.8648	80.9645	78.9801	14.3617	14.6207	2674.27	2658.42	15.3264	14.7365	27.2761	27.5338	27.699	30.1778	6.99011	6.65607	4.98208	4.68119
Chitedze Research Station	TVu-10008	62.1898	60.0961	80.583	76.9783	14.1167	12.231	2222.67	957.88	14.8225	13.4789	27.1205	20.4052	24.6086	17.5118	7.02105	6.7605	4.91195	4.53522
Chitedze Research Station	TVu-1002	61.3992	58.7703	80.39	77.1149	14.3417	14.517	2748.6	2858.34	15.5331	15.2606	27.2249	25.1741	27.949	31.4924	7.35087	7.56138	5.12614	5.11131
Chitedze Research Station	TVu-10035	61.0325	57.6366	79.4918	74.462	14.3178	14.1637	2684.52	2751.89	16.4402	17.13	27.2786	27.8961	25.197	19.8187	6.88739	6.41094	5.04744	4.83913
Chitedze Research Station	TVu-1006	61.5928	58.954	80.9654	78.7322	14.3496	14.6148	2529.84	2152.1	16.4784	17.1517	27.2845	28.3089	26.5589	26.281	7.63043	8.19926	5.2242	5.38233
Chitedze Research Station	TVu-1007	61.925	59.7672	81.1165	79.0852	14.3243	14.2493	2476.48	1860.88	15.5648	15.1032	27.2644	27.0292	28.5464	34.172	6.96135	6.64115	5.01076	4.81293
Chitedze Research Station	TVu-1010	64.7247	67.3777	83.051	85.4165	14.3936	14.9064	2601.8	2309.3	14.9954	13.9336	27.2511	26.4288	26.1734	23.9896	7.02562	6.69288	4.93651	4.56783
Chitedze Research Station	TVu-1015	64.7694	67.2705	83.0434	85.0577	14.2822	13.9723	2539.1	2078.38	13.7895	11.2951	27.0995	19.7886	27.2117	28.0408	6.99826	6.73683	4.92616	4.60803
Chitedze Research Station	TVu-10169	63.1107	62.954	83.0017	85.0899	14.3628	14.7764	2589.05	2392.17	13.299	10.2838	27.2539	26.6292	26.1555	24.6355	6.98447	6.75522	4.89072	4.50953
Chitedze Research Station	TVu-10180	62.1615	60.5703	81.7222	80.8739	14.2452	13.4538	2489.68	2044.64	12.7457	8.86668	27.239	25.9604	26.7815	26.4909	6.50301	5.48413	4.63912	3.75658
Chitedze Research Station	TVu-1042	64.1681	65.6929	82.1349	82.466	14.4677	15.7754	2722.81	2890.63	14.7976	13.3821	27.2799	27.7384	24.7886	18.4697	6.88244	6.39776	4.90176	4.47852
Chitedze Research Station	TVu-10987	63.0741	62.8622	81.4943	80.0395	14.2341	13.3766	2351.64	1473.11	18.2547	21.0265	27.3504	31.0083	25.4164	20.0689	7.60743	8.13832	5.51345	6.14479
Chitedze Research Station	TVu-11372	62.9871	62.7031	81.9034	81.4859	14.2967	13.8666	2724.57	2922.81	13.0617	9.79266	27.203	24.4364	28.3193	34.4634	6.61928	5.73973	4.73727	4.05017
Chitedze Research Station	TVu-1143	65.3086	68.5413	82.9943	84.5151	14.3385	14.5455	2924.96	3654.17	18.7061	22.2207	27.3029	28.9114	28.3255	33.4928	7.12359	6.97543	5.21819	5.34506
Chitedze Research Station	TVu-1146	60.5106	56.2212	79.8081	75.7492	14.4519	15.4334	2833.49	3280.78	15.5425	15.1812	27.2268	25.3587	28.5779	34.3384	7.14102	7.08943	5.19684	5.31433
Chitedze Research Station	TVu-1149	62.5713	61.4162	81.4463	79.8351	14.2801	13.8532	2678.55	2657.78	15.5505	15.0249	27.3021	28.7723	26.3617	24.3045	6.93712	6.57784	5.08214	5.00397
Chitedze Research Station	TVu-11674	64.8546	67.4889	83.5854	86.359	14.2747	13.9292	2526.17	2011.79	13.8583	11.3794	27.2761	27.637	25.3965	19.7741	7.11142	6.9236	5.18127	5.22736
Chitedze Research Station	TVu-1177	62.0896	60.5334	81.9402	81.8566	14.415	15.3431	2692.05	2753.62	13.3694	10.5384	27.1945	23.8231	26.06	24.6074	6.68228	5.88102	4.89467	4.44676
Chitedze Research Station	TVu-1178	64.6829	66.9455	83.1108	85.4137	14.2775	13.9357	2843.73	3217.73	14.9901	14.1091	27.3661	31.5229	27.4439	28.829	7.09307	6.93942	5.06539	4.92229
Chitedze Research Station	TVu-1185	64.354	66.1466	82.2896	82.3685	14.1961	13.093	2765.97	2958.83	15.5639	15.0821	27.1396	21.3891	25.8117	22.0799	6.72584	6.10755	4.98226	4.76731
Chitedze Research Station	TVu-12256	63.243	63.1367	81.8706	81.0762	14.2976	14.0286	2326.62	1302.73	16.1125	16.3427	27.2833	27.94	26.2828	24.6878	7.28853	7.33508	5.07423	4.92323
Chitedze Research Station	TVu-13265	61.2714	58.2468	79.337	73.7294	14.3235	14.1559	2836.31	3270.84	18.0738	20.6076	27.3761	31.8475	29.2878	36.2902	7.77995	8.55654	5.18578	5.2709
Chitedze Research Station	TVu-13413	65.581	69.0878	84.4681	88.7606	14.1565	12.3929	2694.21	2676.87	16.4444	17.16	27.2858	28.076	26.9208	26.3645	7.31125	7.45421	5.27935	5.52426
Chitedze Research Station	TVu-13600	63.0971	62.8112	82.0308	81.8591	14.32	14.2308	2834.8	3245.49	14.2131	12.1882	27.3227	29.5856	26.8135	26.3278	6.95338	6.62943	5.05333	4.91716
Chitedze Research Station	TVu-14004	61.7544	59.4914	80.9804	78.4805	14.5069	16.1441	2429.33	1747.56	16.6012	17.9962	27.2283	25.6425	26.3164	24.7306	7.83096	8.74065	5.57312	6.3477
Chitedze Research Station	TVu-14528	62.1819	60.5564	80.6199	77.5077	14.3516	14.5496	2533.01	2131.74	13.5913	10.8133	27.2337	25.5003	27.3182	28.9903	6.98157	6.70077	5.01315	4.82338
Chitedze Research Station	TVu-1460	61.1343	57.9322	82.1648	82.5192	14.1051	12.075	2533.62	2199.89	14.9959	13.2893	27.2023	24.2205	26.7658	27.0435	7.13161	7.00229	4.83497	4.32178
Chitedze Research Station	TVu-1472	62.7656	62.1523	80.7469	77.9028	14.3487	14.3853	2738.34	2793.21	13.8478	11.3445	27.3426	30.486	26.8997	25.7279	6.75179	6.14591	4.879	4.48313
Chitedze Research Station	TVu-1473	64.615	66.6473	83.9044	87.373	14.2733	13.6631	2783.6	3093.35	16.3921	17.0155	27.1956	23.8754	27.9354	33.0335	7.13373	7.01056	5.22454	5.35471
Chitedze Research Station	TVu-14745	63.851	65.43	82.1942	83.4255	14.3463	14.5309	2847.06	3358.98	15.451	15.1825	27.2551	26.3567	27.2544	28.3713	7.12427	6.99798	5.11706	5.05988
Chitedze Research Station	TVu-1478	61.5386	59.1139	80.844	78.5397	14.3725	14.7369	2734.27	2903.63	14.0826	12.1635	27.2659	27.1006	26.7064	25.9353	6.8845	6.53081	4.87922	4.48775
Chitedze Research Station	TVu-1482	63.7728	65.048	81.8902	82.2286	14.2147	13.2463	2719.42	2785.13	14.9581	13.9928	27.2709	27.1291	29.4112	37.6024	6.8227	6.28705	4.91909	4.53965
Chitedze Research Station	TVu-14828	63.0739	62.8063	81.6106	80.5107	14.3121	14.1411	2474.86	1968.16	15.9546	15.9825	27.3138	29.2975	26.405	25.6322	7.02778	6.72127	5.06461	4.89327
Chitedze Research Station	TVu-1483	63.0044	62.6096	81.7608	80.7565	14.2501	13.5449	2737.46	2892.61	14.0911	11.9647	27.24	26.1075	27.9291	31.7306	6.88342	6.46358	5.1704	5.24348
Chitedze Research Station	TVu-1491	60.913	57.2356	79.6929	75.5231	14.2918	13.7907	2497.11	2009.21	15.1383	14.203	27.2562	26.7092	25.0593	19.7342	6.96211	6.63166	4.83664	4.31824
Chitedze Research Station	TVu-1527	62.2422	60.7903	81.4971	80.5263	14.3146	14.2057	2475.46	1900.27	13.5997	10.7895	27.2815	27.8605	25.553	20.8397	6.5685	5.67134	4.74414	4.05068
Chitedze Research Station	TVu-154	62.6767	61.8383	81.2694	79.8821	14.3299	14.2446	2856.41	3330.09	16.4531	17.0577	27.1835	23.4102	27.606	30.0749	6.82071	6.27935	5.01473	4.79755
Chitedze Research Station	TVu-15462	63.0533	62.9501	81.4697	80.3851	14.4511	15.6373	2642.43	2551.85	16.3235	16.9089	27.1455	21.8878	26.1131	23.3351	7.32579	7.53857	5.17164	5.22265
Chitedze Research Station	TVu-15631	63.5531	64.0646	82.2209	82.5568	14.2609	13.6061	2466.37	1820.99	14.695	13.1843	27.238	25.7549	27.7093	30.8953	7.02989	6.75423	5.11386	5.02822
Chitedze Research Station	TVu-15693	61.5745	59.1394	80.0629	75.7143	14.2643	13.6662	2341.85	1331.23	18.3014	21.1709	27.2661	27.0318	27.5169	29.7476	7.48066	7.8915	5.21313	5.40128
Chitedze Research Station	TVu-15898	62.0712	60.4699	81.8617	81.2293	14.4537	15.761	2540.08	2217.95	14.1958	12.0374	27.2762	27.6129	25.9943	22.6735	6.051	4.42672	4.30495	2.87784
Chitedze Research Station	TVu-16325	58.1647	50.1305	78.2315	70.183	14.429	15.2402	2519.61	2002	15.8705	15.7654	27.2102	24.6406	24.6357	16.9136	7.21274	7.21446	5.2148	5.36435
Chitedze Research Station	TVu-16664	63.9504	65.1744	82.1839	82.7832	14.3803	14.8271	2976.08	3858.93	14.7724	13.3063	27.274	27.5403	29.3381	37.9896	6.61469	5.72793	5.00695	4.74906
Chitedze Research Station	TVu-16816	65.599	69.5698	83.4695	87.2791	14.4378	15.2341	2537.42	2126.99	17.1664	18.7093	27.2841	28.0838	25.4235	20.1692	7.13178	6.94309	5.13918	5.07592
Chitedze Research Station	TVu-16829	60.0501	55.3674	80.8048	78.6452	14.3518	14.4756	2721.34	2976.07	17.2419	19.0454	27.2788	27.6634	28.0892	32.2596	7.85871	8.71797	5.30874	5.53899
Chitedze Research Station	TVu-17060	62.6853	61.9513	82.2592	82.878	14.0919	11.9406	2515.48	2131.96	12.3298	8.07353	27.0497	17.8127	24.4318	16.7262	6.54659	5.61606	4.7363	4.03905
Chitedze Research Station	TVu-17179	63.0701	63.0296	81.1553	79.4265	14.3198	14.3638	2685.27	2687.6	16.3914	17.0868	27.2929	28.1582	26.993	27.0435	7.24346	7.30398	5.19733	5.31087
Chitedze Research Station	TVu-17423	66.547	71.7195	83.0388	85.0255	14.4943	16.0717	2600.18	2340.29	14.7686	13.3903	27.3199	29.4238	26.5333	24.3338	7.13445	7.02275	5.13421	5.12082
Chitedze Research Station	TVu-17526	63.2093	63.3078	81.0377	79.2027	14.3735	14.9955	2731.28	2958.17	15.2684	14.4769	27.2966	28.2534	28.323	33.0105	7.26641	7.34193	5.12107	5.08969
Chitedze Research Station	TVu-17537	61.9187	60.1456	81.6407	81.268	14.5084	16.3496	2746.58	2958.28	16.7086	17.8044	27.3313	30.2596	26.0755	23.631	7.84457	8.71854	5.40698	5.84522
Chitedze Research Station	TVu-17553	63.0028	62.8791	81.4568	80.631	14.2131	13.1712	2715.41	2743.41	15.7827	15.8601	27.2708	26.9952	28.1135	30.959	6.96164	6.66281	5.10105	5.04417
Chitedze Research Station	TVu-17565	63.4875	63.9594	82.1564	82.3283	14.3802	14.8336	2546.3	2158.02	13.7529	11.1759	27.2304	25.5476	26.6906	26.3286	6.88148	6.37296	5.03944	4.83404
Chitedze Research Station	TVu-17611	62.817	62.1565	81.8155	81.0799	14.3991	15.3726	2650.35	2614.14	14.4734	12.7784	27.2135	24.7782	27.7971	31.1165	7.00746	6.71695	5.03021	4.81557
Chitedze Research Station	TVu-17657	62.0725	60.4479	82.3504	83.3931	14.1884	13.088	2473.35	1893.27	14.3358	12.486	27.2046	24.4299	24.5325	17.3042	7.25437	7.28208	5.07186	4.92258
Chitedze Research Station	TVu-17660	62.4781	61.1793	81.6415	80.3285	14.1887	13.0095	2826.54	3131.72	15.2673	14.5546	27.3702	31.7724	26.9712	26.1387	6.97304	6.64597	5.14567	5.17225
Chitedze Research Station	TVu-17713	64.8072	67.067	84.1052	88.2892	14.3519	14.5586	2790.93	3159.58	15.3873	14.7186	27.2546	26.7182	28.8483	36.383	6.99662	6.72411	5.15999	5.19425
Chitedze Research Station	TVu-17721	62.107	60.2827	80.3771	76.4379	14.2974	13.9062	2675.61	2607.57	14.5195	12.7651	27.2211	24.9182	29.1813	37.2206	6.87481	6.3479	4.99104	4.70827
Chitedze Research Station	TVu-17796	62.6924	61.9307	81.6109	80.4785	14.3057	14.1526	2798.08	3247.2	15.243	14.7364	27.2988	28.7274	27.6879	29.5368	7.09777	6.96667	5.17413	5.19912
Chitedze Research Station	TVu-1785	65.1528	68.0609	84.9299	90.6287	14.3046	14.1046	2434.25	1652.68	15.7004	15.3276	27.2907	28.4645	24.9321	17.5316	6.96038	6.619	5.07737	4.96207
Chitedze Research Station	TVu-1797	61.9821	60.3287	82.129	82.7417	14.1944	13.0693	2579.04	2360.23	15.4726	15.2289	27.0976	19.6672	24.0281	14.5223	6.88535	6.41557	4.92419	4.51356
Chitedze Research Station	TVu-1806	59.566	54.0551	78.4107	71.7016	14.3591	14.5922	2137.24	568.228	14.1107	12.0098	27.2239	25.236	27.1037	27.5966	6.86352	6.40384	4.87669	4.45385
Chitedze Research Station	TVu-1909	60.4007	55.9947	79.0318	72.7757	14.3231	14.2029	2533.52	2077.98	15.0161	13.8642	27.2107	24.8439	26.9221	27.3494	6.93927	6.53468	4.98804	4.70957
Chitedze Research Station	TVu-2098	64.4682	66.5143	82.9583	85.0141	14.3012	14.1479	2355.5	1414.9	14.6057	13.2118	27.1765	23.2445	26.7398	26.7226	6.70603	6.03546	4.91913	4.57923
Chitedze Research Station	TVu-22	62.0948	60.6514	81.3557	80.382	14.321	14.2244	2331.77	1430.42	15.5702	14.8427	27.2737	27.3641	25.6515	21.4539	8.0658	9.22711	4.96792	4.67549
Chitedze Research Station	TVu-2656	60.1554	55.3296	79.5135	74.5506	14.2373	13.2857	2604	2515.11	15.4169	15.0263	27.3433	30.6993	28.6875	35.6803	7.15251	7.04946	5.10194	5.02875
Chitedze Research Station	TVu-2657	65.9619	70.1287	83.9101	87.4489	14.4041	15.0612	2480.17	1996.89	17.2582	18.8562	27.3367	30.436	27.4419	29.6838	7.68703	8.25702	5.44453	5.8949
Chitedze Research Station	TVu-2661	62.4062	61.1443	81.2662	79.5093	14.2969	13.9248	2762.73	2971.38	15.9596	16.0354	27.3641	31.3127	25.0525	19.5719	7.39584	7.64686	5.21413	5.35818
Chitedze Research Station	TVu-2665	62.918	61.9014	81.697	80.1995	14.3417	14.5219	2793.2	3071.46	17.522	19.4543	27.3046	28.9223	26.2746	24.5691	6.94545	6.62951	5.07966	5.01545
Chitedze Research Station	TVu-267	61.9263	59.7296	81.5941	80.1857	14.4783	15.7207	2761.54	3085.21	16.3749	16.8847	27.142	21.6152	27.4823	29.4585	7.33233	7.5021	5.09671	5.05335
Chitedze Research Station	TVu-2685	62.7827	62.2112	80.9374	78.8543	14.3851	14.9639	2840.95	3218.47	13.3482	10.3134	27.2552	26.7964	27.832	31.0297	7.34775	7.52739	5.2002	5.29667
Chitedze Research Station	TVu-2687	64.4747	66.2787	82.7752	83.926	14.239	13.3566	2544.63	2294.57	13.5511	10.7835	27.2253	25.5579	24.927	19.3681	6.77706	6.17146	4.90908	4.50773
Chitedze Research Station	TVu-2692	61.613	59.1164	80.4001	77.0174	14.4217	15.2301	2888.96	3487.26	15.7022	15.5696	27.3181	29.4147	27.5666	29.7319	7.19399	7.20469	5.09574	5.0036
Chitedze Research Station	TVu-2693	62.2698	60.8649	82.0423	82.1007	14.4118	15.3036	2808.88	3173.66	13.556	10.8646	27.2368	25.8231	27.5144	29.8108	6.65648	5.92679	4.91801	4.53926
Chitedze Research Station	TVu-2695	64.5262	66.5057	82.6176	83.9509	14.3156	14.3563	2735.43	2886.44	17.5922	19.6333	27.3405	30.5179	28.2575	33.9126	7.07681	6.86322	5.2208	5.36098
Chitedze Research Station	TVu-2699	61.9852	59.9291	81.8774	81.4402	14.2288	13.3483	2513.35	2098.5	15.8809	15.8223	27.1814	23.6611	27.4101	29.9873	7.2363	7.24953	5.14692	5.16015
Chitedze Research Station	TVu-2701	64.3671	66.1513	82.669	83.8815	14.4014	14.8691	2673.25	2651.63	14.2294	12.0346	27.3086	29.0586	25.6343	20.8977	6.89972	6.38686	4.82474	4.25379
Chitedze Research Station	TVu-2706	63.5311	64.1676	84.9642	90.6331	14.1155	12.3759	2396.58	1684.75	15.6855	15.4309	27.2814	28.0648	24.5064	16.861	7.46946	7.86542	5.12586	5.14269
Chitedze Research Station	TVu-2714	62.2525	61.1248	80.0591	76.9312	14.2947	13.9928	2967.5	3758.82	15.4297	14.8782	27.2494	26.3612	28.2955	32.5646	7.04216	6.82552	5.18869	5.28018
Chitedze Research Station	TVu-2716	61.7087	59.3655	81.039	78.8166	14.269	13.8868	2598.64	2407.52	14.2763	12.3162	27.2395	25.9229	27.5908	29.2941	6.85696	6.39402	4.9587	4.67019
Chitedze Research Station	TVu-2720	61.5275	58.7926	81.4654	79.9078	14.4124	15.0859	2952.83	3839.62	16.5081	17.1373	27.45	35.4008	26.9023	27.9507	6.99306	6.68407	5.07203	4.90526
Chitedze Research Station	TVu-273	66.0381	70.7815	84.9441	91.234	14.3172	14.3204	2661.87	2614.36	15.5542	15.235	27.2595	26.6326	26.6724	25.8124	6.73132	5.96841	4.87205	4.35982
Chitedze Research Station	TVu-2978	62.853	62.0169	82.41	82.8853	14.0602	11.7549	2719.87	2870.25	13.2347	9.94124	27.2548	26.7035	28.118	32.369	6.6016	5.80866	4.82501	4.33287
Chitedze Research Station	TVu-3063	64.3008	66.0289	83.2674	85.5383	14.3629	14.5198	2290.09	1205.81	15.7315	15.5515	27.2748	27.4422	27.1215	27.8388	7.30804	7.48676	5.03108	4.90171
Chitedze Research Station	TVu-3064	64.7683	67.0442	83.2713	85.2029	14.5206	16.1125	2441.2	1831.08	16.5991	17.5104	27.2327	25.6858	25.4245	21.0785	7.44548	7.73333	5.28539	5.52768
Chitedze Research Station	TVu-3067	64.1726	65.3724	83.7258	86.7743	14.2028	13.0819	2668.13	2663.86	17.315	18.9922	27.3152	29.4497	25.8347	22.6505	7.31472	7.40795	5.14885	5.13656
Chitedze Research Station	TVu-3090	62.3354	61.1474	81.3511	80.1405	14.4224	15.3303	2918.07	3586.93	14.8178	13.5186	27.2591	26.7261	26.7776	26.4539	7.1321	7.06166	4.9035	4.52338
Chitedze Research Station	TVu-3094	61.6998	59.2883	80.5709	77.6241	14.2185	13.2594	2603.47	2412.53	13.3911	10.3365	27.2076	24.7083	26.0878	22.8687	6.50468	5.50975	4.70055	3.95935
Chitedze Research Station	TVu-3097	62.9069	62.4671	81.7105	81.0876	14.2533	13.6666	2569.09	2299.03	16.0558	16.4708	27.2942	28.4201	25.7392	23.2511	7.4444	7.82531	5.2524	5.47029
Chitedze Research Station	TVu-310	63.219	63.0837	81.8727	81.2265	14.3573	14.7204	2874.93	3442.78	15.6976	15.5626	27.2647	27.2179	26.5878	26.1502	7.51905	7.93666	5.31866	5.61305
Chitedze Research Station	TVu-3101	59.8088	54.5933	80.6389	78.1073	14.3206	14.25	2321.08	1308.96	15.5242	14.9969	27.2651	27.1038	26.2835	23.974	7.93586	8.92361	5.2034	5.32
Chitedze Research Station	TVu-3217	64.7402	66.9194	82.7781	83.7962	14.3656	14.6372	2740.57	2883.59	12.8202	9.06506	27.2387	25.9873	25.8499	23.1451	6.64752	5.84946	4.77186	4.10383
Chitedze Research Station	TVu-322	62.7764	62.2836	81.7944	81.7517	14.0982	11.9188	2696.22	2713.55	14.7239	13.487	27.2737	27.4443	26.0996	23.3175	6.82634	6.2924	5.09283	4.98719
Chitedze Research Station	TVu-3224	64.5912	66.7155	83.9148	87.431	14.1923	13.0493	2404.34	1574.62	13.6419	11.0361	27.3761	32.1654	26.5031	24.4318	6.54809	5.71241	4.77088	4.16255
Chitedze Research Station	TVu-3228	62.5197	61.6512	80.6729	78.182	14.3262	14.487	2820.55	3222.89	14.7006	13.3985	27.2301	25.287	27.112	27.6978	7.13821	7.06309	4.9821	4.77732
Chitedze Research Station	TVu-3229	62.3515	60.8327	81.7541	80.9366	14.1134	12.2386	2840.62	3335.52	14.3261	12.406	27.3336	30.2501	30.5829	43.0356	6.74623	6.08529	4.47951	3.31461
Chitedze Research Station	TVu-3231	62.5319	61.603	82.1222	82.4101	14.2889	14.0986	2815.57	3202.51	15.928	15.9251	27.3	28.8181	25.5783	21.2807	7.25199	7.38382	5.19798	5.35326
Chitedze Research Station	TVu-3233	61.3371	58.4158	80.132	76.2127	14.2677	13.671	2433.79	1805.04	14.6156	13.2057	27.2752	27.6534	26.2388	24.7603	6.74793	6.11248	4.89456	4.47206
Chitedze Research Station	TVu-3235	60.8378	57.2881	80.9645	78.7644	14.441	15.6668	2465	1903.15	14.4594	12.6587	27.2003	24.1856	26.1256	23.3109	7.13629	7.01474	5.17146	5.19084
Chitedze Research Station	TVu-3243	63.4055	63.6813	81.863	81.5031	14.3207	14.5647	2513	2152.13	14.1049	11.8716	27.2953	28.2515	27.2371	29.1383	6.93009	6.51924	4.96307	4.64934
Chitedze Research Station	TVu-3247	64.017	65.6862	85.7103	93.4732	14.3181	14.1053	2591.33	2391.44	15.5109	15.3247	27.4054	33.1086	28.9357	35.8443	7.35714	7.54474	5.18302	5.23223
Chitedze Research Station	TVu-3248	63.4891	63.9169	82.9392	84.4119	14.3338	14.3657	2796.31	3181.55	16.0305	16.2189	27.2516	26.6664	27.1187	27.9716	7.28115	7.36654	5.1449	5.12461
Chitedze Research Station	TVu-3249	63.3969	63.9535	82.3046	83.2583	14.3699	14.7595	2633.29	2486.51	15.1923	14.3189	27.2581	26.7958	27.5002	29.8043	7.32785	7.4807	4.81489	4.27351
Chitedze Research Station	TVu-3250	64.8916	67.586	82.9079	84.5166	14.3049	13.9562	2557.52	2285.62	16.0496	16.3791	27.3157	29.2463	26.6252	26.4533	7.10734	6.99222	5.04474	4.91758
Chitedze Research Station	TVu-3252	63.5797	64.2571	81.9682	81.9527	14.3727	14.6696	2701.65	2829.83	14.8523	13.5614	27.2396	25.6633	25.8561	22.9265	7.29543	7.30129	5.04823	4.8151
Chitedze Research Station	TVu-3253	64.3155	65.9743	83.1816	85.2932	14.3455	14.5579	2573.97	2273.66	17.2293	18.6074	27.1638	22.4808	25.9517	23.037	7.1164	6.8837	5.1565	5.11362
Chitedze Research Station	TVu-3254	63.6172	64.2674	82.5737	83.4006	14.2428	13.5877	2730.18	2938.23	13.6648	10.9332	27.2265	25.437	27.361	28.9518	6.7584	6.09475	4.79833	4.19306
Chitedze Research Station	TVu-3257	62.3092	61.2731	80.1105	77.2781	14.3269	14.2144	2823.22	3124.9	15.3061	14.5405	27.4278	34.3761	27.8665	30.0504	7.30278	7.44075	5.12362	5.1092
Chitedze Research Station	TVu-3259	62.5435	61.3805	82.0047	81.5036	14.4032	15.3607	3028.95	3997.31	15.3335	14.5752	27.2333	25.5842	26.3881	25.6702	7.05321	6.84326	5.1652	5.17597
Chitedze Research Station	TVu-3261	65.145	68.3654	83.7441	87.4702	14.3475	14.5274	2552.01	2254.82	17.358	19.2097	27.1983	24.1416	27.8872	30.8835	7.24247	7.35348	5.20385	5.34397
Chitedze Research Station	TVu-3262	61.1714	57.889	84.8401	89.8069	14.3431	14.3151	2829.06	3092.02	15.7415	15.5218	27.3274	29.8401	27.8081	30.6181	7.20435	7.14827	5.02492	4.79186
Chitedze Research Station	TVu-3263	64.9648	67.5915	82.9906	84.6799	14.3135	14.2893	2887.17	3450.74	15.9698	15.8814	27.2235	25.1424	28.5287	33.4763	7.09419	6.88336	5.32624	5.55111
Chitedze Research Station	TVu-3267	62.3025	60.8582	80.384	76.7768	14.4239	15.2747	2399.36	1716.63	14.1892	12.1493	27.2385	25.8972	26.6095	25.9089	7.56429	8.08101	5.17501	5.24974
Chitedze Research Station	TVu-328	62.6763	61.8072	82.0719	82.1503	14.3349	14.3051	2645.81	2589.28	16.0024	16.0931	27.3605	31.5448	26.125	24.1051	7.33133	7.48279	5.16525	5.21471
Chitedze Research Station	TVu-3502	62.9824	62.6942	80.9417	78.7266	14.1733	12.7184	3005.69	3947.28	16.3935	17.0674	27.2976	28.5924	25.6713	22.2332	7.07135	6.86479	5.1829	5.22199
Chitedze Research Station	TVu-3504	62.5874	61.9072	81.8007	81.9279	14.2582	13.548	2988.91	3849.53	14.4881	13.0459	27.1726	23.0811	28.5242	33.6226	6.95079	6.60097	5.01657	4.78788
Chitedze Research Station	TVu-3506	63.128	62.9853	82.0712	82.224	14.3899	14.8638	2705.61	2883.29	15.498	15.0497	27.3014	28.9004	27.928	31.5143	7.6663	8.29737	5.26452	5.48707
Chitedze Research Station	TVu-3508	62.3654	61.2435	80.808	78.5858	14.4645	15.5114	2816.94	3185.6	14.7336	13.1349	27.3023	28.6262	26.4492	24.5683	6.72982	5.97335	4.92862	4.50839
Chitedze Research Station	TVu-3509	63.3047	63.7077	81.9818	82.0445	14.3638	14.5986	2892.81	3483.4	14.3994	12.6891	27.2938	28.4898	25.9154	22.9968	6.9219	6.55789	5.01197	4.83181
Chitedze Research Station	TVu-3510	61.844	59.876	81.8147	81.7401	14.2383	13.5439	2500.53	2015.09	13.4989	10.9573	27.2435	26.2893	25.2205	19.5108	7.38432	7.69421	5.10623	5.08492
Chitedze Research Station	TVu-3511	62.0854	60.2237	81.362	80.0344	14.2589	13.6533	2479.16	1962.9	14.3086	12.5008	27.3293	29.9676	26.9254	27.9211	6.54064	5.5988	4.76444	4.13972
Chitedze Research Station	TVu-3515	62.6318	61.5976	81.1934	79.117	14.3491	14.3725	3126.83	4297.21	15.3226	14.8308	27.3049	28.9295	26.1521	23.5091	7.23278	7.34832	5.09969	5.09586
Chitedze Research Station	TVu-3524	63.8317	64.8548	82.9886	85.0157	14.2884	13.8913	2896	3593.32	16.6466	17.5459	27.3055	28.8002	27.6487	31.4243	7.3962	7.61232	5.17532	5.20227
Chitedze Research Station	TVu-3525	63.058	63.1784	81.3765	80.3101	14.257	13.636	2680.59	2671.8	14.1599	12.0971	27.1937	23.636	26.6959	25.6663	6.8985	6.42764	4.94057	4.57876
Chitedze Research Station	TVu-3526	62.2006	60.7179	80.6227	77.5815	14.3055	14.2363	2675.37	2627.97	14.7223	13.2548	27.2417	26.0713	26.0698	23.2093	6.78349	6.17294	4.98872	4.72315
Chitedze Research Station	TVu-3532	64.1338	65.5538	82.824	84.1368	14.3684	14.6788	2668.14	2652.14	16.9379	18.1529	27.2533	26.5731	26.9585	27.2458	7.07077	6.94185	5.11265	5.09944
Chitedze Research Station	TVu-3533	65.757	69.5558	84.5702	89.0846	14.4226	15.3122	2666.44	2668.62	15.277	14.5341	27.2098	24.6126	25.6282	21.6219	7.35129	7.56098	5.2409	5.43471
Chitedze Research Station	TVu-3534	65.4653	68.9413	84.4449	89.3431	14.4717	15.6464	2802.23	3111.19	18.088	20.7356	27.2275	25.5509	26.5662	25.0518	7.51875	7.92382	5.48091	6.04889
Chitedze Research Station	TVu-3535	66.5789	71.9193	85.6426	92.9259	14.2539	13.5382	2665.77	2641.5	15.7408	15.496	27.317	29.241	26.7568	27.121	7.25858	7.34349	5.14669	5.15607
Chitedze Research Station	TVu-3540	61.8913	60.1725	80.0542	76.6846	14.3214	14.2505	2592.58	2340.58	14.9811	13.8866	27.2419	26.1891	25.8887	22.7298	7.05081	6.84824	5.03436	4.87233
Chitedze Research Station	TVu-3550	62.2971	60.7191	81.5519	80.0843	14.3277	14.3414	2909.42	3526.58	18.2956	21.142	27.3315	30.2202	24.4087	15.3616	7.53026	7.98576	5.17861	5.26675
Chitedze Research Station	TVu-361	60.9402	57.4805	80.5138	77.7667	14.388	14.9274	2512.62	2115.2	13.9246	11.6049	27.2848	28.2554	27.431	30.3525	6.64475	5.87753	4.70014	3.9773
Chitedze Research Station	TVu-375	62.8281	61.9668	80.9784	78.4252	14.3574	14.5314	2799	3241.18	15.9696	16.1076	27.2763	27.488	26.4334	26.2232	6.95522	6.62018	4.99256	4.7523
Chitedze Research Station	TVu-387	63.9487	64.7561	82.9998	84.2696	14.3929	14.7466	2750.41	2946.83	15.9095	15.8685	27.3623	31.0965	27.2289	28.7416	7.30087	7.41824	5.30359	5.57201
Chitedze Research Station	TVu-391	62.5787	61.5279	80.3612	76.9694	14.2411	13.507	2829.09	3203.83	15.8688	15.7891	27.2856	27.8341	29.0663	36.4466	7.23796	7.28687	5.11115	5.07967
Chitedze Research Station	TVu-406	62.2299	60.7587	81.6249	80.7141	14.2965	14.1156	2781.31	3105.72	15.2771	14.5222	27.2052	24.4553	27.5749	30.0261	7.43061	7.76043	5.11004	5.06181
Chitedze Research Station	TVu-416	62.1309	60.4655	80.2757	77.4175	14.3297	14.2698	2456.73	1857.02	14.4464	12.745	27.3511	31.1286	26.8938	27.9608	6.88013	6.40061	4.97695	4.69526
Chitedze Research Station	TVu-4568	61.8185	59.61	80.9343	78.2745	14.4499	15.7527	2706.32	2741.24	14.9173	13.628	27.3121	29.0995	26.9593	26.9572	6.75799	6.15691	4.98448	4.71659
Chitedze Research Station	TVu-46	64.065	65.1266	83.4009	85.5883	14.2673	13.896	2815.41	3123.87	17.4115	19.0982	27.2045	24.4254	28.4115	34.0492	7.31281	7.41575	5.15201	5.13257
Chitedze Research Station	TVu-692	62.2872	60.7354	80.6285	77.5752	14.3095	14.4935	2959.94	3766.16	15.9821	16.1063	27.2078	24.4969	26.9592	28.0861	7.46547	7.79724	5.30372	5.58436
Chitedze Research Station	TVu-81	65.9688	70.221	84.0561	87.9894	14.4237	14.999	2746.48	2931.37	15.2253	14.5327	27.2187	25.3547	25.8221	22.2189	6.77446	6.18823	5.00953	4.77363
Chitedze Research Station	TVu-972	61.573	59.0303	78.8939	72.345	14.2908	13.9593	2407.88	1524.89	14.9146	13.709	27.3142	29.0945	27.6029	29.7154	6.52965	5.514	4.74698	4.03144
Chitedze Research Station	TVu-990	64.909	67.6307	83.0205	84.7469	14.2648	13.7284	2644.74	2559.61	15.5057	14.9842	27.2792	27.6628	26.5601	25.2549	7.35044	7.56281	5.25768	5.49185
Chitedze Research Station	TVu-993	61.44	58.699	80.1473	76.2744	14.3267	14.1931	2657.68	2552.91	15.199	14.4547	27.2523	26.5688	27.9322	30.9551	7.03461	6.78431	5.07575	4.9643
Chitedze Research Station	TVx-3236	62.7859	61.941	81.7259	80.7973	14.2687	13.6029	2698.47	2723.44	14.3449	12.4839	27.2513	26.4432	26.6145	25.2996	6.92274	6.55601	4.94874	4.66665
Chitedze Research Station	TZcp34	63.2314	63.0758	81.1592	78.9482	14.3538	14.7313	2689.04	2776.5	14.8853	13.7817	27.3194	29.3953	26.8261	26.9099	6.93077	6.56806	4.96776	4.67046
Chitedze Research Station	TZcp43	62.9169	62.4738	81.4399	80.1183	14.2894	13.9138	2632.73	2519.86	16.2564	16.775	27.2458	26.1218	26.123	23.5648	7.44589	7.80932	5.22087	5.38007
Chitedze Research Station	TZcp5	62.7281	62.2725	81.3542	80.7081	14.2855	13.9161	2889.5	3490.72	15.238	14.6534	27.2643	26.7912	28.2944	32.2447	7.0393	6.83179	5.06716	4.92556
Chitedze Research Station	TZcp50	65.3753	68.7143	83.5148	86.1948	14.3448	14.4996	2532.53	2166.87	14.5804	12.8319	27.2762	27.6277	24.722	17.8885	6.795	6.14324	4.89869	4.46394
Chitedze Research Station	TZcp67	63.1896	63.1143	81.6827	80.8111	14.4802	15.8505	2666.15	2621.08	17.322	19.0309	27.3089	29.0156	25.9592	22.5336	7.53653	7.93822	5.21368	5.27766
Chitedze Research Station	TZcp70	63.84	64.9585	82.5227	83.6561	14.5348	16.4753	2628.49	2533.37	15.0708	14.2759	27.2247	25.3231	26.085	23.7845	7.45804	7.80771	5.24975	5.43094
Chitedze Research Station	TZcp84	63.0213	62.9154	84.1357	88.3856	14.2205	13.2981	2595.03	2359.86	15.9221	15.9449	27.2983	29.2836	26.3585	24.2343	6.06231	3.65026	4.29556	2.14172
Chitedze Research Station	TZcp95	63.6825	64.6386	81.4052	80.0329	14.3566	14.8647	2619.63	2427.46	15.9392	15.864	27.1927	23.9389	25.9753	22.9355	7.29805	7.43406	5.04246	4.90977
Chitedze Research Station	UAM09-1046-6-1	61.3112	58.4493	80.3192	77.2775	14.1644	12.6338	2754.58	2946.21	16.8801	18.0863	27.134	21.4913	27.4865	29.7803	7.58417	8.12353	5.14658	5.16631
Chitedze Research Station	UAM09-1051-1	62.0956	60.4525	81.4479	80.2933	14.3251	14.151	2811.25	3243.28	15.4965	15.1139	27.2612	26.9898	27.3539	28.0506	7.43197	7.71019	5.13023	5.10947
Chitedze Research Station	UAM14-126-19-2	62.388	61.3031	81.2474	79.9432	14.3763	14.8515	2881.63	3429.7	16.7264	17.806	27.3334	30.1305	26.53	25.4065	7.4308	7.78013	5.22186	5.35723
Chitedze Research Station	V1-F3	62.3912	61.3967	80.6847	78.8081	14.2184	13.3693	2647.28	2596.47	14.9645	13.8162	27.2655	27.0717	27.0147	28.1647	7.02177	6.75994	5.03395	4.84846
Chitedze Research Station	V3-F0	63.3511	63.6166	86.4095	95.1018	14.3996	14.9735	2650.11	2525.08	17.5216	19.343	27.3886	32.4533	26.0717	23.3296	7.55035	8.00979	5.37895	5.76114
Chitedze Research Station	Vuli-1	61.1556	58.2196	80.2687	76.9393	14.4395	15.3212	2975.17	3879.65	15.1879	14.5268	27.3144	29.5207	29.1846	36.8169	7.00255	6.7411	5.10238	5.00989
Chitedze Research Station	Vuli-2	62.3439	61.11	80.7831	78.3196	14.4068	15.1353	2871.94	3352.75	15.1239	14.1777	27.3673	31.7367	27.2461	27.5946	7.05772	6.89152	5.00639	4.82152
Chitedze Research Station	Vuli-AR 1	61.7008	59.4195	81.7652	81.0374	14.3332	14.1868	2812.63	3315.42	15.26	14.4384	27.2881	28.1416	27.676	30.9792	6.98374	6.67696	5.1108	5.07259
Chitedze Research Station	Vuli-AR 2	62.2179	60.5793	81.6241	80.3194	14.2758	13.6711	2646.29	2564.96	15.1266	14.1631	27.2927	28.3611	26.9889	27.2573	7.048	6.8527	4.89479	4.5325
Across two locations	Aloka Local	59.9359	58.9686	96.4097	97.9912	13.5666	12.3455	1728.17	1391.97	13.8556	13.61	20.8373	19.9898	24.7712	20.9122	7.15646	7.14107	4.82826	4.74815
Across two locations	B301	60.6799	59.9455	91.9594	90.9931	13.7379	13.7716	2293.62	2497.1	11.7339	10.889	21.2807	21.2001	26.2627	28.091	6.05759	5.62238	4.31724	4.04441
Across two locations	Danila	59.4104	58.112	93.0334	92.5759	13.5995	12.6033	1951.12	1839.64	14.9702	15.1277	22.1827	23.7026	25.533	24.442	7.65648	7.8267	5.3727	5.49221
Across two locations	Fahari	62.7463	62.9424	94.2264	94.5672	13.7401	13.8882	2017.28	1977.35	12.3102	11.6282	21.376	21.6685	26.3706	28.2154	7.01864	6.96016	4.79387	4.71357
Across two locations	GUARIBA	59.0516	57.8135	91.6844	90.6001	13.6378	12.9492	2331.56	2590.98	14.6686	14.7465	21.2593	21.1819	26.8934	31.2469	6.86036	6.73829	4.98225	4.96326
Across two locations	INIA - 36	59.9223	58.9705	93.4134	93.2701	13.609	12.7502	2112.11	2141.79	15.8171	16.2847	22.8735	25.8042	28.0232	36.0135	7.50594	7.62375	5.12046	5.15245
Across two locations	INIA - 73	58.5158	56.9727	89.9225	87.7685	13.6545	13.2044	2183.72	2268.33	14.7656	14.8509	20.4614	18.7415	26.6135	29.4562	6.53649	6.28023	4.67911	4.54331
Across two locations	IT-18	60.292	59.392	91.2696	89.9084	13.7994	14.319	2429.68	2750.36	13.6928	13.5054	21.7229	22.4861	26.8755	31.049	6.96127	6.87939	4.94622	4.91248
Across two locations	IT00K-1263	59.1965	57.9961	86.6765	82.7036	13.873	15.0087	2439.23	2769.05	11.8467	11.0509	23.2778	26.7643	26.645	29.8335	6.36847	6.05933	4.51993	4.32451
Across two locations	IT04K-108	59.5598	58.5759	90.0574	88.0369	13.7827	14.2303	2343.24	2569.48	14.2802	14.2852	21.5999	22.2833	26.5197	29.5826	6.80656	6.65465	4.7188	4.60184
Across two locations	IT04K-227-4	58.2515	56.5591	89.8527	87.7914	13.8299	14.6378	1758.37	1470.41	16.8381	17.5882	22.0006	23.277	26.9466	31.3946	7.87816	8.12532	5.4414	5.58675
Across two locations	IT04K-321-1	59.306	58.0667	91.3892	90.0458	13.6741	13.2631	2356.06	2607.15	12.3147	11.6589	22.4248	24.4343	26.6794	30.1851	7.10871	7.07919	5.06957	5.0811
Across two locations	IT06K-108	59.4669	58.3452	89.6788	87.3979	13.7811	14.173	2240.52	2343.6	13.7793	13.5973	21.1198	20.6451	27.0339	31.1364	6.78604	6.64342	4.88275	4.82639
Across two locations	IT07K-210-1-1	60.8564	60.3425	89.2257	86.6674	13.6737	13.285	2202.36	2295.58	14.3775	14.4272	21.1492	20.934	28.1805	37.2806	7.28965	7.33321	4.89041	4.84037
Across two locations	IT07K-230-2-9	62.0854	61.8557	92.8414	92.3078	13.6507	12.9902	2372.34	2628.27	14.5167	14.5241	21.3878	21.3194	26.6906	29.7372	7.49209	7.5957	5.36384	5.47894
Across two locations	IT07K-297-13	58.0796	56.3238	91.2163	89.8176	13.7198	13.6607	1971.18	1901.5	15.8684	16.3278	21.811	22.8759	26.1384	27.6793	7.59224	7.75121	4.97022	4.94587
Across two locations	IT07K-299-6	59.5691	58.4491	91.5522	90.3877	13.6947	13.3611	2141.48	2220.51	15.0934	15.3242	22.4142	24.3471	26.6323	29.9028	7.20208	7.20155	4.94247	4.90297
Across two locations	IT07K-318-33	59.9863	58.992	95.0661	95.8243	13.5587	12.189	2015.46	1931.95	15.0381	15.2314	22.109	23.5032	26.4853	29.0312	7.68184	7.86905	5.28227	5.36259
Across two locations	IT08K-150-12	58.9297	57.5596	93.1619	92.9008	13.6688	13.1865	2527.78	2930.67	17.1187	17.9225	22.273	24.0059	26.2965	28.0181	7.72633	7.9255	5.30403	5.40317
Across two locations	IT08K-180-11	60.1939	59.33	93.5076	93.3815	13.6639	13.175	2327.78	2560.43	15.4855	15.8555	22.0482	23.2173	26.2545	27.744	7.36608	7.41461	5.16036	5.20157
Across two locations	IT09K-227-9	59.9914	59.1459	92.3903	91.7231	13.7229	13.6561	2598.45	3046.39	13.0695	12.6809	22.6945	25.0781	26.8182	30.65	7.21195	7.21757	5.06284	5.07491
Across two locations	IT10K-817-1A	59.7694	58.6772	89.0153	86.3139	13.7168	13.6533	2543.63	2957.22	15.2349	15.504	22.6266	25.2196	26.8017	30.729	7.03014	6.96501	4.87942	4.81561
Across two locations	IT10K-817-1B	60.4063	59.5849	90.9467	89.3748	13.5569	12.2167	2354.44	2638.69	14.4664	14.523	20.9274	20.2808	26.9031	31.2644	7.53564	7.67816	5.11244	5.14214
Across two locations	IT10K-817-3	59.5817	58.3817	89.4583	86.9477	13.7373	13.7594	2512.24	2903.89	16.4793	17.1225	21.5622	21.9257	26.1398	27.6231	7.61408	7.76208	5.24657	5.31456
Across two locations	IT10K-817-7	58.8502	57.4849	86.358	82.2104	13.6507	13.0673	2569.08	3037.27	15.3567	15.6779	23.0155	26.6906	26.4332	29.4355	7.47475	7.61264	5.10399	5.14203
Across two locations	IT10K-834-3	59.6472	58.5964	92.2163	91.4263	13.5362	12.0329	2638.14	3127.25	16.861	17.6913	20.9298	20.1535	27.5088	33.9561	7.31192	7.36076	4.92683	4.89316
Across two locations	IT10K-973-1	59.2246	57.9586	91.9543	91.0189	13.661	13.069	2082.15	2054.83	17.9126	19.025	22.2037	23.6487	26.0803	26.9991	7.89282	8.16598	5.53783	5.72574
Across two locations	IT10K-985-3	58.6852	57.2346	95.5615	96.6758	13.57	12.3403	1941.75	1817.2	15.5149	15.8673	21.1448	20.829	25.3656	23.987	8.26043	8.67361	5.25929	5.34613
Across two locations	IT13K-1079-3	61.4141	60.9468	91.5695	90.287	13.5606	12.2395	1916.31	1757.63	18.9864	20.3673	22.2813	24.0168	25.7144	25.2178	7.63949	7.79115	5.26927	5.34273
Across two locations	IT82E-16	56.8987	54.7677	85.7836	81.2322	13.8148	14.5128	2296.37	2487.63	11.9606	11.209	19.7667	16.7607	26.6208	30.0907	6.57144	6.32762	4.82579	4.74365
Across two locations	IT835-728-5	58.6024	57.0474	89.9739	87.8198	13.7884	14.2601	1735.64	1432.05	13.1004	12.7309	21.4436	21.5494	25.3498	23.5805	6.96067	6.87482	4.89521	4.8477
Across two locations	IT90K-76	59.1516	57.9335	93.014	92.6529	13.7501	13.9329	2548.5	2958.75	15.7795	16.2644	23.2845	26.8771	25.8986	25.8399	7.39689	7.4919	5.20717	5.28065
Across two locations	IT93K-452-1	58.843	57.363	90.7679	89.1261	13.6616	13.0795	1980.47	1866.55	14.9366	15.0737	22.7562	25.356	26.022	26.5012	6.92417	6.83122	4.92226	4.8835
Across two locations	IT97K-1069-6	60.5326	59.8452	88.6091	85.4589	13.763	14.0431	2333.43	2544.31	13.2093	12.8527	23.719	28.1476	27.4781	33.5667	5.83218	5.31722	4.17058	3.84409
Across two locations	IT97K-390-2	60.4352	59.6426	92.3654	91.648	13.7733	14.0986	2347.89	2582.94	14.6727	14.7763	21.8505	22.7963	25.9228	26.4121	7.37628	7.44833	5.21145	5.27728
Across two locations	IT97K-499-35	59.4381	58.3017	92.0469	91.1504	13.6534	13.0801	2149.75	2212.64	14.9291	15.1608	20.9683	20.4507	25.5294	24.6958	7.80875	8.06061	5.36213	5.48987
Across two locations	IT98K-131-2	61.4856	61.1804	93.0163	92.7047	13.5889	12.4965	2036.83	1994.18	14.7752	14.8673	22.3891	24.2607	26.268	27.8717	7.62657	7.79624	5.28883	5.38825
Across two locations	IT98K-205-8	59.385	58.1351	93.2452	93.0057	13.6611	13.1334	2011.43	1960.88	14.289	14.258	21.8631	22.7796	25.6895	25.4329	7.43714	7.52165	5.12224	5.14872
Across two locations	IT98K-390-2	61.7257	61.476	93.3096	93.1381	13.7051	13.4998	2075.73	2039.27	13.5163	13.2391	20.6973	19.4423	26.6389	29.5887	7.28385	7.32199	5.08948	5.11085
Across two locations	IT98K-503-1	57.4366	55.4817	89.8418	87.7328	13.6035	12.6659	2173.44	2299.08	15.6011	15.9996	22.1244	23.6513	27.0602	32.0889	7.58693	7.73225	5.23127	5.30596
Across two locations	IT99k-1122	58.3252	56.7565	89.6095	87.3395	13.8073	14.3743	2451.76	2773.93	13.0433	12.5903	21.3388	21.2498	26.088	27.143	6.71218	6.52537	4.97585	4.94676
Across two locations	IT99K-241-2	61.188	60.6127	93.2891	92.9357	13.6833	13.37	2282.62	2478.89	16.137	16.5581	21.026	20.3707	26.2614	28.4449	7.44585	7.5048	5.25018	5.30477
Across two locations	IT99K-407-8	57.3429	55.4261	89.3834	87.0113	13.8086	14.411	2237.33	2406.43	13.8307	13.6368	20.4494	18.9144	25.9839	27.0448	7.11659	7.07961	5.17123	5.21293
Across two locations	IT99K-409-8	58.2548	56.663	88.7587	86.0225	13.7669	14.0206	2247.56	2381.19	13.8007	13.6614	22.1574	23.7897	26.6168	29.6809	6.87195	6.76928	4.94945	4.92221
Across two locations	IT99K-529-1	58.9897	57.4619	90.2969	88.2189	13.6513	13.0711	1898.21	1744.49	13.1228	12.7134	18.8355	14.4273	25.1957	23.0129	7.02976	6.96063	4.7829	4.68943
Across two locations	IT99K-573-1-1	60.9324	60.3439	93.5252	93.4182	13.6769	13.2654	2010.63	1951.36	17.0078	17.7951	20.5378	19.0932	25.2953	23.5695	7.78992	8.02327	5.41314	5.55506
Across two locations	IT99K-573-2-1	60.612	59.8418	93.8476	93.9453	13.5797	12.5028	2180.92	2310.86	15.4163	15.7257	22.6526	25.2082	27.0413	32.2283	7.53266	7.65727	5.28688	5.37616
Across two locations	IT99K-7-21-2-2-1	60.8638	60.2967	93.0879	92.7369	13.5571	12.2095	2036.62	1984.23	16.6136	17.3162	20.6337	19.2471	25.475	24.4908	7.44212	7.52175	5.24192	5.31281
Across two locations	Mkanakaufiti	62.5607	62.6954	93.3454	93.2051	13.531	12.0497	2019.01	1972.33	13.1934	12.8312	20.6045	19.3605	26.7128	30.1597	7.61537	7.7583	5.26282	5.3374
Across two locations	MWcp03	66.5011	68.1769	97.1847	99.2543	13.5883	12.4823	2612.12	3095.69	22.4945	25.0015	21.429	21.5132	25.9529	26.6858	8.70917	9.27979	5.93224	6.26096
Across two locations	MWcp04	65.2106	66.2851	93.5119	93.3731	13.7113	13.5799	2360.76	2628.49	19.8879	21.5786	21.1938	20.7759	26.1869	27.9274	7.63661	7.80515	5.30256	5.402
Across two locations	MWcp05	69.3087	72.037	98.9761	102.057	13.6497	12.9726	1835.18	1609.43	17.2842	18.2016	20.3916	18.7449	25.3827	23.526	8.14346	8.51517	5.45237	5.61413
Across two locations	MWcp06	60.8899	60.3445	93.4794	93.395	13.5697	12.3527	1946.52	1850.84	16.1534	16.804	21.3358	21.2939	25.3124	23.4881	7.804	8.03881	5.37396	5.50318
Across two locations	MWcp07	65.1971	66.2385	97.7719	100.047	13.9083	15.3066	2116.73	2173.86	14.5888	14.6123	20.6381	19.5464	25.3053	23.6954	7.84192	8.08857	5.58298	5.78593
Across two locations	MWcp08	59.3661	58.1616	92.7278	92.161	13.8361	14.6566	2666.28	3200.04	16.9948	17.8167	22.4405	24.4717	26.2172	27.6323	6.96649	6.88904	5.29418	5.39674
Across two locations	MWcp09	70.9347	74.2309	104.197	110.157	13.6814	13.3505	1517.96	990.269	17.9943	19.1169	20.3498	18.7728	24.357	18.7274	8.44086	8.91113	5.78042	6.05585
Across two locations	MWcp10	67.3628	69.2248	95.4744	96.3912	13.8877	15.1304	1857.88	1638.65	15.4404	15.7633	21.5003	21.801	24.9126	21.6606	7.7335	7.92757	5.29006	5.3769
Across two locations	MWcp11	59.9289	58.9255	91.1985	89.7774	13.9455	15.6685	2573.02	3037.27	14.2277	14.1687	23.4254	27.2718	26.7826	30.6151	7.28886	7.32685	5.243	5.32367
Across two locations	MWcp15	59.7338	58.6991	95.7737	97.0635	13.8279	14.6389	1774.92	1494.54	16.0389	16.6787	20.2101	18.166	24.8856	21.4624	7.89636	8.17202	5.44859	5.60785
Across two locations	MWcp17	65.5395	66.8129	95.1821	96.0882	13.5029	11.767	1449.18	883.874	15.8944	16.3405	19.6455	16.5339	25.5796	24.6251	8.30927	8.7337	5.60911	5.82466
Across two locations	MWcp18	61.6823	61.35	93.2806	92.9841	13.8169	14.5034	2224.51	2349.97	14.069	13.908	19.7602	16.8225	25.4076	24.0091	6.74993	6.57661	4.98705	4.95806
Across two locations	MWcp19	60.3437	59.5144	92.0108	91.0796	13.7694	14.1061	2384.69	2668.06	17.2043	18.0353	22.5174	24.8222	25.4239	23.8388	7.61121	7.77523	5.57322	5.77187
Across two locations	MWcp20	60.3104	59.5175	92.2931	91.4971	13.7776	14.177	2336.65	2590.07	17.0681	17.8993	23.3148	27.5269	25.5496	24.5813	7.69998	7.91717	5.18495	5.24468
Across two locations	MWcp21	70.7403	74.0791	102.056	106.881	13.7052	13.4588	1502.79	958.85	16.9382	17.8854	21.505	21.6611	25.28	23.2431	7.76678	7.98764	5.41705	5.56004
Across two locations	MWcp2227	61.0388	60.6722	92.1769	91.487	13.8387	14.7742	2596.71	3030.02	12.0386	11.3527	22.9853	26.0613	26.8405	30.4484	6.77401	6.63144	4.64045	4.50449
Across two locations	MWcp2232	59.0522	57.6782	90.359	88.445	13.8621	14.9044	2731.07	3354.68	11.4069	10.5261	22.5156	24.8216	25.9743	26.6706	6.40256	6.10637	4.73272	4.62432
Across two locations	MWcp23	60.098	59.1559	91.6081	90.3837	13.9224	15.4714	2315.04	2534.41	14.3175	14.2741	21.1815	20.8949	25.9843	26.7199	7.63269	7.7834	5.31922	5.42037
Across two locations	MWcp24	67.6138	69.6765	96.3931	97.9363	13.7138	13.6449	2936.28	3702.16	21.8315	24.1422	21.9136	23.1158	25.5467	24.2835	8.12401	8.48234	5.95266	6.29516
Across two locations	MWcp25	58.9255	57.553	91.8095	90.7591	13.7238	13.6469	2294.83	2481.93	14.5787	14.6362	20.984	20.3567	26.1416	27.5591	7.57707	7.72241	5.22713	5.29621
Across two locations	MWcp26	72.2811	76.2066	102.244	107.139	13.692	13.4564	1610	1206.46	20.4306	22.2626	20.6318	19.4768	25.0553	22.5808	8.50454	8.98454	5.58093	5.77488
Across two locations	MWcp27	59.7258	58.6503	89.0059	86.2821	13.9832	15.9666	2097.23	2117.63	12.8899	12.3645	24.1867	29.3914	27.2592	32.5692	6.49677	6.22646	4.81194	4.71938
Across two locations	MWcp28	60.1498	59.2834	91.6543	90.5325	13.8176	14.5314	1835.94	1626.08	14.4198	14.4565	20.2784	18.5046	25.6195	24.8305	7.40402	7.49776	5.222	5.29901
Across two locations	MWcp29	68.0864	70.3176	100.981	105.182	13.6303	12.8806	1856.59	1657.77	16.0177	16.5066	22.1569	23.7841	24.782	20.9389	8.48075	8.96188	6.03068	6.39873
Across two locations	MWcp30	60.2803	59.5026	91.2209	89.8444	13.9254	15.532	2203.76	2352.09	13.4664	13.2053	23.1102	26.3291	26.0193	26.8834	6.81286	6.66362	4.93404	4.90019
Across two locations	MWcp305	58.5738	57.065	89.9665	87.8511	14.0012	16.1095	2677.39	3209.03	13.2933	13.0043	22.4007	24.452	26.7987	30.3059	6.56233	6.32892	4.90291	4.85483
Across two locations	MWcp309	60.0266	59.0249	87.5662	84.0233	13.9553	15.7542	2322.53	2573.82	13.9062	13.7866	20.838	20.0408	25.9324	26.3498	6.62095	6.41487	4.80757	4.73246
Across two locations	MWcp31	66.7809	68.4806	96.4446	98.0055	13.831	14.701	1861.69	1699.17	12.9729	12.5223	20.434	19.0527	24.9218	22.0241	7.5939	7.73344	5.30138	5.39
Across two locations	MWcp32	59.6904	58.6818	93.2346	93.0291	13.7501	13.9142	2317.1	2510.39	17.9776	19.0757	21.6146	22.2319	25.0761	22.193	7.77874	8.00194	5.59283	5.79882
Across two locations	MWcp3254	61.8062	61.5908	91.4305	90.1826	13.8242	14.6454	2379.53	2691.72	13.9192	13.7622	22.6469	25.1142	26.0407	26.8037	7.19173	7.19378	5.04335	5.04995
Across two locations	MWcp33	64.9721	65.8472	96.7531	98.4031	13.6472	13.0261	2333.07	2589.08	18.0021	19.1069	21.4553	21.7658	25.1592	22.8317	8.69511	9.2524	5.97403	6.31464
Across two locations	MWcp34	59.9902	58.9992	92.7563	92.2376	13.7178	13.6192	2138.63	2200.6	16.0244	16.4661	20.2226	18.0315	25.2766	23.2837	7.82609	8.05541	5.54766	5.73411
Across two locations	MWcp35	67.2396	69.1363	101.318	105.709	13.6463	12.9402	1794.64	1537.37	19.8982	21.6052	20.4519	18.9162	25.5646	24.9096	8.50525	8.99572	5.83006	6.12402
Across two locations	MWcp36	69.5748	72.3598	101.291	105.593	13.7058	13.5741	1920.04	1772.13	21.1781	23.2298	21.9529	23.1516	24.9472	21.9409	7.6473	7.80122	5.41492	5.54408
Across two locations	MWcp37	73.7795	78.2049	105.174	111.689	13.7548	13.8968	1540.5	1047.7	15.9579	16.521	19.8281	17.0003	24.0581	17.4754	8.23204	8.61381	5.72083	5.96443
Across two locations	MWcp38	61.0419	60.4357	96.5771	98.185	13.7672	14.114	2461.24	2858.52	16.8622	17.6064	21.7374	22.4625	26.2216	28.3497	7.97009	8.24535	5.47004	5.61728
Across two locations	MWcp39	60.7282	60.0452	92.7916	92.2867	13.936	15.6048	2694.18	3259.17	16.1541	16.6751	20.7448	19.7636	25.9553	26.809	7.67281	7.84661	5.46324	5.61935
Across two locations	MWcp40	70.0445	73.1086	100.98	105.211	13.6669	13.1964	1497.26	942.374	16.3126	16.9403	20.855	20.1768	25.188	23.0345	8.18358	8.56132	5.82163	6.11442
Across two locations	MWcp41	59.7172	58.6523	93.9356	94.0968	13.8606	14.9532	2402.29	2725.65	14.4073	14.3779	20.5024	19.0965	26.2108	28.1318	7.26611	7.27684	5.2701	5.34336
Across two locations	MWcp43	71.0079	74.4023	100.983	105.2	13.6074	12.6814	1888.2	1709.5	15.6289	16.0455	22.1699	23.628	25.6863	25.1094	7.96481	8.25198	5.29038	5.37909
Across two locations	MWcp44	70.1226	73.2288	102.231	107.159	13.5933	12.4824	1725.53	1383.42	16.9908	17.762	21.3551	21.3255	25.3675	23.4722	8.65251	9.20827	6.15774	6.5695
Across two locations	MWcp45	65.6365	66.9181	94.0984	94.3348	13.7397	13.8189	2247.15	2381.01	19.7493	21.3963	21.3956	21.5658	25.4161	24.4536	8.16669	8.51468	5.76955	6.03139
Across two locations	MWcp46	73.2856	77.5452	102.652	107.755	13.7787	14.1494	2155.67	2266.45	18.1531	19.2973	19.8381	17.1747	25.1149	22.7754	7.93935	8.21552	5.6376	5.85373
Across two locations	MWcp47	60.6111	59.8282	90.5635	88.7371	13.8254	14.6129	2758.24	3386.74	16.894	17.6569	22.0382	23.3411	26.3561	28.548	7.57154	7.70388	5.38586	5.5091
Across two locations	MWcp479	61.7126	61.5551	89.9057	87.7851	13.8153	14.4996	2248.86	2424.53	13.1836	12.7359	21.0132	20.3987	26.4407	29.1112	6.70873	6.52924	5.01442	5.0062
Across two locations	MWcp48	72.6492	76.7059	102.493	107.552	13.7148	13.5771	2015.56	1934.7	18.8554	20.2588	21.466	21.8151	25.8245	25.9994	8.7516	9.34218	6.08411	6.47009
Across two locations	MWcp49	63.7878	64.411	93.7822	93.8841	13.5757	12.3472	1857.09	1642.87	19.1563	20.6369	21.8128	22.7111	25.7933	25.787	8.63153	9.18529	6.20397	6.64351
Across two locations	MWcp50	72.4163	76.342	103.513	109.149	13.7597	14.0719	1644.76	1278.55	17.3536	18.2445	20.7272	19.8344	24.8189	21.1119	8.42503	8.88374	5.69282	5.92923
Across two locations	MWcp51	60.1906	59.3569	92.8489	92.3835	13.8193	14.5163	2398	2707.9	15.7191	16.1084	21.7425	22.6702	26.4151	29.1775	7.49635	7.61327	5.2975	5.39422
Across two locations	MWcp52	66.0414	67.5256	100.494	104.431	13.5721	12.3587	1903.74	1771.38	15.6948	16.1275	19.6153	16.5739	26.1743	28.1318	7.87565	8.13426	5.29296	5.38464
Across two locations	MWcp53	69.0476	71.61	97.6421	99.8992	13.6893	13.3666	1893.43	1706.23	20.4485	22.2968	21.8912	22.8566	25.1946	22.8028	8.09665	8.44544	5.74947	6.01222
Across two locations	MWcp54	73.6967	78.1832	103.864	109.767	13.5637	12.3176	1828.6	1664.09	17.8096	18.8666	19.6354	16.669	24.6672	20.5921	7.52114	7.63761	5.33301	5.44611
Across two locations	MWcp55	59.0336	57.7662	92.2009	91.401	13.7087	13.5714	2209.77	2345.27	14.9501	15.1233	21.76	22.5169	26.6376	29.739	7.7641	7.9715	5.27485	5.35404
Across two locations	MWcp57	67.4978	69.4319	99.3591	102.579	13.7947	14.2793	2124.32	2151.35	16.7454	17.4218	22.338	24.1441	25.4675	24.05	8.12239	8.46491	5.80363	6.07597
Across two locations	MWcp58	62.1896	62.1429	92.8388	92.3304	13.7609	14.0141	2136.74	2207.29	15.1783	15.3691	20.8503	19.7583	26.3966	29.0212	6.76367	6.595	5.32403	5.42391
Across two locations	MWcp59	60.2766	59.4109	92.3412	91.5563	13.8081	14.418	2484.07	2869.67	17.4402	18.4388	22.2899	24.1703	25.654	25.1721	8.16906	8.5376	5.68253	5.92312
Across two locations	MWcp60	64.2173	64.8683	94.8031	95.4153	13.6479	13.0175	2590.92	3033.5	21.6331	23.8482	23.4776	27.3454	25.6529	25.125	7.83953	8.08054	5.98253	6.33126
Across two locations	MWcp601	59.224	57.8841	91.6588	90.3901	13.9588	15.7661	2334.23	2592.34	13.1421	12.7502	21.7853	22.6814	25.7891	25.9199	6.84783	6.7137	5.0567	5.06268
Across two locations	MWcp61	68.3894	70.7941	99.9314	103.593	13.7986	14.2942	2026	1970	16.0361	16.5762	20.574	19.3021	24.9159	21.3832	7.71455	7.92689	5.32309	5.43493
Across two locations	MWcp62	70.2388	73.2831	100.362	104.118	13.643	13.0174	1755.12	1433.62	16.3924	16.9833	20.9621	20.2683	25.2504	22.912	8.42907	8.88959	5.70907	5.95452
Across two locations	MWcp63	66.7947	68.4965	100.595	104.968	13.6343	12.8999	2323.81	2528	19.4281	20.9362	22.2985	23.9613	25.6697	25.0723	8.36955	8.79003	6.31056	6.7699
Across two locations	MWcp64	72.2412	76.0479	103.434	108.944	13.8242	14.5628	1591.59	1091.34	22.0871	24.8989	22.8342	25.4846	25.431	24.6062	7.72868	7.92381	5.62606	5.84109
Across two locations	MWcp645	58.0331	56.282	89.847	87.6904	13.8259	14.586	2165.63	2244.09	13.0465	12.567	20.1141	17.8856	25.0422	22.1526	7.22468	7.22871	5.17713	5.22257
Across two locations	MWcp65	66.6424	68.343	100.455	104.383	13.7879	14.2868	1670.7	1285.17	19.3175	20.7744	21.1704	20.8818	25.1839	22.5652	8.55242	9.06778	6.03746	6.40844
Across two locations	MWcp66	59.4012	58.2626	92.6506	92.1177	13.7345	13.799	2386.05	2653.38	15.5784	15.9504	21.1415	20.8011	26.0853	27.2771	7.01183	6.932	5.19652	5.25422
Across two locations	MWcp67	62.6359	62.7935	93.6199	93.6527	13.7083	13.5283	2408.54	2757.15	19.2026	21.0318	21.029	20.4453	25.2825	22.9573	7.38987	7.47808	5.27127	5.37612
Across two locations	MWcp68	65.893	67.211	99.1874	102.292	13.7005	13.5091	2072.3	2083.01	16.4799	17.1042	20.4786	18.9819	24.5248	19.9646	7.64256	7.79992	5.42898	5.56776
Across two locations	MWcp69	73.2694	77.5752	102.054	106.871	13.7426	13.9304	1575.73	1102.11	18.2336	19.4141	21.8866	22.9116	24.6178	19.8336	8.55323	9.05249	5.78585	6.0561
Across two locations	MWcp71	70.6623	73.8913	99.669	103.033	13.7851	14.2504	2050.71	2028.53	17.7402	18.7501	20.726	19.8389	26.3313	28.6607	8.33611	8.75579	5.60223	5.80478
Across two locations	MWcp72	70.341	73.4871	97.4663	99.5958	13.4904	11.5949	1763.15	1470.49	17.4713	18.4519	20.5752	19.1328	26.0717	27.2679	9.02273	9.71678	6.10833	6.50974
Across two locations	MWcp73	69.4139	72.1048	100.611	104.527	13.7635	14.0134	1674.89	1308.33	16.215	16.7725	22.2309	23.7968	23.9274	17.1688	7.99048	8.28557	5.41498	5.55011
Across two locations	MWcp76	65.3369	66.6229	97.5666	99.9273	13.8061	14.3468	2002.96	1901.55	15.1139	15.372	21.8812	22.7899	27.2086	32.1758	7.71548	7.91712	5.35857	5.48358
Across two locations	MWcp91	71.9454	75.6782	101.114	105.262	13.8245	14.5803	2251.27	2408.71	15.9768	16.5008	21.7305	22.2871	26.5844	29.9532	7.45961	7.55609	5.44893	5.60873
Across two locations	MZcp 004	64.9136	65.8857	94.0365	94.2767	13.9293	15.4826	2139.93	2171.96	14.0287	13.8817	22.42	24.289	26.0394	26.8332	7.03703	6.97875	5.098	5.12021
Across two locations	MZcp 011	64.4817	65.3514	96.9603	98.8572	13.7262	13.7311	2162.31	2211.77	14.7036	14.7694	21.7357	22.4306	26.0464	26.7712	7.0352	6.97089	4.9264	4.87742
Across two locations	MZcp 012	65.3277	66.6661	94.3565	94.9015	13.7621	13.9936	1977.95	1868.33	13.1127	12.7524	21.9449	23.0005	25.5085	24.4696	7.23189	7.24142	5.08846	5.10448
Across two locations	MZcp 013	62.2407	62.092	94.3081	94.5952	13.9182	15.456	2085.88	2110.95	13.4209	13.1197	22.2095	23.7983	25.3281	23.9096	7.46828	7.56149	5.11014	5.13058
Across two locations	MZcp 014	65.0258	66.0336	95.4068	96.3835	13.962	15.8075	2356.37	2615.16	11.0642	10.0486	21.1377	20.887	25.7581	25.9648	6.9426	6.84504	4.80732	4.72219
Across two locations	MZcp 015	66.7163	68.4725	97.9724	100.484	13.8057	14.3394	1822.21	1564.03	18.4169	19.6852	21.5063	21.7245	25.5993	24.9388	8.03796	8.3512	5.55096	5.74102
Across two locations	MZcp 016	67.0758	68.967	96.5615	98.1905	13.8138	14.4475	1926.66	1810.7	14.276	14.2508	20.5409	19.0648	25.1911	23.3621	7.18826	7.17922	5.36065	5.4774
Across two locations	MZcp 020	66.4405	68.0807	95.6923	96.9252	13.617	12.7703	1955.97	1879.43	18.4807	19.8343	23.3439	27.3338	24.6181	20.4042	7.88049	8.14066	4.94338	4.9155
Across two locations	MZcp 021	66.8614	68.6712	98.3182	101.059	13.7147	13.6742	2475.6	2850.71	17.6333	18.6388	22.6311	25.0662	25.1054	23.0275	7.68317	7.87726	5.34319	5.46267
Across two locations	MZcp 022	66.2628	67.9128	94.4304	94.9926	13.6945	13.333	2220.82	2360.88	13.8003	13.7306	22.4896	24.4006	25.8125	25.7519	7.37148	7.45724	5.05999	5.08319
Across two locations	MZcp 023	65.5622	66.8315	97.197	99.2719	13.8453	14.7047	1980.57	1904.01	14.9062	15.1039	21.9637	23.0915	26.0446	27.2006	7.30612	7.34728	5.10202	5.12615
Across two locations	MZcp 024	65.8559	67.367	95.7335	97.0269	13.9341	15.4886	2347.31	2584.52	17.295	18.2833	22.4007	24.5265	26.0711	26.999	7.46794	7.56688	5.63157	5.849
Across two locations	MZcp 025	67.3944	69.3528	94.4069	94.8547	13.9267	15.4948	2227.12	2370.68	15.7729	16.1847	21.8961	22.8572	25.5652	24.8967	7.38225	7.45091	5.58375	5.78745
Across two locations	MZcp 026	66.7462	68.3596	98.1332	100.619	13.7283	13.6686	2132.02	2181.69	18.381	19.5825	21.3894	21.397	26.3754	28.4147	8.2898	8.70325	5.89362	6.21138
Across two locations	MZcp 030	68.5895	71.1052	97.0701	99.0736	13.7172	13.6057	2124.28	2150.09	14.2537	14.2253	21.3833	21.4395	25.5572	24.6402	6.90032	6.79605	4.99207	4.97449
Across two locations	MZcp 032	64.7196	65.6454	92.9675	92.5744	13.729	13.7958	1874.17	1701	12.6704	12.1713	22.1739	23.9447	24.8093	21.006	7.14899	7.12048	4.97088	4.94612
Across two locations	MZcp 044	70.2687	73.6616	96.5743	98.1727	13.7809	14.2461	2173.48	2280.4	13.6911	13.4869	23.4674	27.5812	25.9333	26.5027	7.08288	7.04571	5.09812	5.12395
Across two locations	MZcp 045	60.2715	59.4015	92.4531	91.7585	13.8127	14.442	2130.35	2172.22	11.3989	10.49	20.4225	18.7083	26.1598	27.4975	6.62963	6.42898	4.69208	4.5694
Across two locations	MZcp 046	58.9634	57.6978	91.0759	89.7403	13.7647	14.0813	2324.48	2546.41	12.4723	11.8822	20.8404	19.9655	27.0233	31.3595	5.8817	5.39314	4.40132	4.17188
Across two locations	Raha 1	64.2275	64.9653	93.9063	94.0632	13.8545	14.8772	2408.19	2681.93	13.9341	13.7769	21.9936	23.213	26.9918	31.3965	6.99969	6.92242	4.95236	4.91952
Across two locations	Raha 2	61.18	60.7313	89.9476	87.8173	13.8402	14.7185	2369.03	2633.56	12.5011	11.8323	21.7703	22.6384	25.7488	25.4577	6.82358	6.66111	4.92284	4.86634
Across two locations	Sanzi	55.8279	53.3234	82.393	76.0393	13.6256	12.7344	2035.92	1948.7	12.3144	11.7009	21.4105	21.3041	26.4081	28.6173	6.5761	6.34211	4.54197	4.35494
Across two locations	Sudan-1	58.3953	56.8196	87.5324	83.9859	13.7618	14.0007	2319.04	2538.26	12.8048	12.2929	24.1235	29.2888	27.6563	35.0251	6.43741	6.15154	4.49671	4.2946
Across two locations	Tumaini	60.0772	59.2504	91.2413	89.885	13.7487	13.9283	2265.87	2447.57	12.4324	11.8608	22.8152	25.5526	27.4724	33.6615	6.88203	6.77063	4.88727	4.83338
Across two locations	TVu-10008	61.2334	60.5973	92.4396	91.6272	13.4894	11.639	1530.75	1062.14	14.4172	14.4281	19.2655	15.4368	24.3527	19.2337	7.55986	7.70352	4.86082	4.79833
Across two locations	TVu-1002	59.3079	58.1541	91.8804	90.9367	13.5874	12.4892	1772.73	1482.21	13.8364	13.6753	19.8246	17.0996	24.2695	18.5581	7.441	7.53712	5.12221	5.15864
Across two locations	TVu-10035	61.5171	61.1835	90.4789	88.6686	13.576	12.4015	1967.06	1872.94	15.0787	15.2726	19.9742	17.5112	24.5634	19.9779	7.15875	7.12998	4.98173	4.95336
Across two locations	TVu-1006	58.2934	56.5935	90.6487	88.8874	13.7105	13.5708	1880.02	1692.74	15.1762	15.4091	21.3526	21.4044	25.3692	23.782	7.70763	7.9068	5.185	5.23875
Across two locations	TVu-1007	60.6041	59.8849	92.0909	91.156	13.8101	14.4127	1831.24	1567.82	13.7801	13.5544	20.7208	19.4788	25.8987	26.2406	7.04319	6.99619	4.92043	4.87653
Across two locations	TVu-1010	63.3175	63.8483	94.7751	95.4858	13.5862	12.4514	1826.98	1588.15	12.7541	12.2754	19.5173	16.252	25.0145	22.0032	6.90467	6.79264	4.70043	4.5793
Across two locations	TVu-1015	62.5863	62.7456	94.0449	94.3678	13.656	13.1242	2054.17	2007.08	12.7419	12.2512	19.7253	16.7461	26.0005	26.7215	6.8649	6.74271	4.77347	4.68225
Across two locations	TVu-10169	62.3598	62.2858	97.4364	99.5618	13.8521	14.835	1797.93	1556.52	9.58583	8.15635	20.9053	20.2079	25.047	22.5353	6.67258	6.48315	4.37444	4.13281
Across two locations	TVu-10180	60.7797	60.0889	93.3637	93.1326	13.6501	12.9462	1584.87	1124.53	10.2685	8.94142	20.8815	20.0639	25.2962	23.2021	6.04591	5.5949	4.18604	3.85585
Across two locations	TVu-1042	62.9153	62.9756	94.058	94.1964	13.6714	13.2215	2082.26	2111.65	14.3982	14.3695	21.2157	21.0054	25.3173	23.7406	7.018	6.94936	4.80181	4.70937
Across two locations	TVu-10987	60.9526	60.4156	91.4981	90.2907	13.6697	13.1935	1801.41	1545.26	15.6611	15.9694	22.0376	23.3132	25.0083	21.8345	7.67365	7.85369	5.44062	5.58535
Across two locations	TVu-11372	63.2688	63.5851	91.6479	90.4396	13.5813	12.3993	2116.19	2157.97	10.4505	9.24682	20.0679	17.6694	27.3568	33.5189	6.01254	5.55669	4.36032	4.10183
Across two locations	TVu-1143	64.5958	65.4571	93.1664	92.8981	13.8926	15.1444	2437.4	2766.92	17.0105	17.8597	21.4347	21.6163	26.6552	29.9193	6.83417	6.70298	5.07881	5.097
Across two locations	TVu-1146	55.981	53.3691	84.9625	79.9909	13.5974	12.5616	1925.17	1784.77	14.1435	14.094	19.3482	15.6086	25.2212	23.1743	6.86913	6.7546	5.02782	5.02353
Across two locations	TVu-1149	59.4977	58.3549	93.2233	92.9659	13.6344	12.8528	2122.42	2145.79	12.8445	12.3039	20.2308	18.0744	25.5248	24.3121	6.75958	6.60002	4.80843	4.72166
Across two locations	TVu-11674	65.5726	66.8796	94.0697	94.3433	13.7951	14.394	1990.11	1906.52	11.4586	10.5342	21.3725	21.4776	24.7534	20.6431	6.78133	6.61742	5.01378	4.9986
Across two locations	TVu-1177	62.7992	62.9114	93.657	93.6053	13.8135	14.4753	1997.97	1942.31	10.4088	9.19377	19.6625	16.5914	25.5975	24.8558	6.19678	5.80218	4.3617	4.10179
Across two locations	TVu-1178	66.4401	68.0982	93.8297	93.9819	13.7951	14.2705	2228.73	2333.53	12.6306	12.1501	23.3153	26.86	26.642	30.06	7.03017	6.97728	4.85132	4.78499
Across two locations	TVu-1185	64.5763	65.5197	93.7581	93.8483	13.6074	12.6399	1928.87	1768.82	13.1942	12.7825	19.2915	15.5796	24.6991	20.6475	6.38249	6.07548	4.62878	4.4794
Across two locations	TVu-12256	60.2505	59.4581	93.7579	93.8619	13.5849	12.4807	1739.6	1409.04	14.4177	14.4262	21.5333	21.9721	25.4704	24.1002	7.3794	7.45707	4.95685	4.93421
Across two locations	TVu-13265	56.9561	54.7826	91.2448	89.8455	13.4519	11.2868	2037.28	2007.27	17.1646	17.9691	20.38	18.58	26.3634	28.4917	8.31652	8.73615	5.15332	5.19046
Across two locations	TVu-13413	66.5725	68.2424	95.5906	96.7321	13.7517	13.8852	2223.22	2337.09	14.551	14.6165	22.2054	23.8548	26.2867	28.3724	7.22336	7.23138	5.2428	5.31486
Across two locations	TVu-13600	62.4307	62.4919	94.4211	94.8835	13.8074	14.325	2249.62	2347.89	12.1076	11.4053	21.5621	21.7399	25.5742	24.5304	6.6138	6.39732	4.83032	4.75166
Across two locations	TVu-14004	60.6079	59.8994	92.8528	92.3671	13.6495	13.0692	1582.56	1099.19	18.5716	20.136	20.6212	19.3816	24.4327	19.2011	8.68344	9.24956	5.73487	5.99534
Across two locations	TVu-14528	58.9968	57.692	89.6024	87.2901	13.809	14.4527	1951.96	1853.85	10.9365	9.91619	21.0199	20.4583	26.3785	28.5653	6.48795	6.23218	4.65898	4.53023
Across two locations	TVu-1460	60.621	59.9073	94.6017	95.1046	13.5535	12.2048	1969.11	1886.52	12.3033	11.5596	20.7337	19.6813	26.3177	28.6066	7.23826	7.25815	4.43735	4.21289
Across two locations	TVu-1472	61.1667	60.794	92.3061	91.6016	13.6964	13.5085	2042.44	1988.57	10.784	9.63544	21.9163	23.0101	25.1734	22.6525	6.59016	6.37104	4.64634	4.50806
Across two locations	TVu-1473	65.6121	66.8212	95.9852	97.2877	13.7468	13.8459	2140.15	2202.5	15.3079	15.5643	20.4463	18.8046	26.6668	30.3316	6.91741	6.80768	4.98038	4.9521
Across two locations	TVu-14745	63.2683	63.7133	93.6755	93.7389	13.7821	14.2627	2623.45	3113.87	12.7788	12.3086	21.8233	22.5882	27.1333	32.3439	6.63389	6.41709	4.7074	4.57938
Across two locations	TVu-1478	60.2775	59.4984	91.815	90.8219	13.7383	13.8053	2022.47	1971.2	11.5029	10.7021	20.6881	19.5781	25.6559	25.1889	6.72759	6.57147	4.62672	4.4859
Across two locations	TVu-1482	61.5725	61.3464	92.2681	91.5821	13.5782	12.3925	2046.43	1961.91	11.9566	11.24	20.9535	20.1684	26.9107	30.7639	6.44979	6.16498	4.65785	4.51714
Across two locations	TVu-14828	62.2539	62.2193	92.7717	92.283	13.4996	11.7247	1738.09	1430.2	14.7241	14.798	20.912	19.989	24.8785	21.297	7.25693	7.27118	5.19035	5.24212
Across two locations	TVu-1483	59.9397	58.9463	91.9143	90.8866	13.6909	13.4064	2116.46	2185.38	11.6677	10.86	20.7894	19.933	26.2917	28.3354	6.23613	5.87264	4.8269	4.75018
Across two locations	TVu-1491	59.7575	58.6632	92.1486	91.2907	13.5695	12.3177	1609.48	1185.68	12.3962	11.7942	19.8834	17.3742	24.1008	17.8899	6.52142	6.27281	4.394	4.15185
Across two locations	TVu-1527	59.2436	58.011	91.4525	90.2035	13.7818	14.1712	1906.17	1732.1	11.8869	11.0542	21.2912	21.2275	25.5011	24.2356	6.33705	6.00971	4.57322	4.39263
Across two locations	TVu-154	60.6815	59.972	92.8686	92.4153	13.6757	13.2256	2238.93	2379.51	15.1723	15.3935	19.9743	17.4021	26.4715	28.9402	6.73108	6.55314	4.7253	4.60322
Across two locations	TVu-15462	61.6723	61.5461	92.622	92.1493	13.7863	14.26	2210.59	2316.54	16.2446	16.8208	20.9302	20.2824	25.5833	24.5301	7.44884	7.56543	5.14995	5.19618
Across two locations	TVu-15631	65.7265	66.9296	94.1482	94.3508	13.5486	12.1115	1539.87	1016.54	12.8459	12.3025	19.9624	17.273	24.7198	20.8111	7.2183	7.21829	4.94863	4.90468
Across two locations	TVu-15693	59.7145	58.798	92.0098	91.142	13.559	12.2526	1581.7	1109.21	16.6926	17.4459	20.5005	19.0743	25.348	23.6647	7.87186	8.13301	5.27845	5.37859
Across two locations	TVu-15898	59.8593	58.8339	90.9119	89.2926	13.7822	14.2094	1822.67	1629.47	12.0299	11.3061	22.0232	23.3538	25.6903	25.5134	6.00919	5.55868	4.1222	3.78152
Across two locations	TVu-16325	54.0627	50.7356	85.0472	80.0744	13.7668	14.0177	1663.85	1265.38	14.0471	13.906	19.6027	16.5254	23.6972	15.6712	7.18217	7.16782	5.04809	5.04729
Across two locations	TVu-16664	63.2621	63.6309	93.8616	93.9764	13.9114	15.3734	2564.53	3006.8	12.3449	11.6365	21.3603	21.6028	27.8009	35.7162	6.48809	6.21318	4.82227	4.72919
Across two locations	TVu-16816	65.4513	66.7733	94.6248	95.2267	13.842	14.6629	1771.03	1478.99	14.2722	14.2415	21.2187	21.2225	25.2546	23.2573	7.18038	7.17364	5.03897	5.03658
Across two locations	TVu-16829	56.5345	54.3251	92.5127	91.8758	13.5827	12.3978	2004.28	1940.91	16.4384	17.1038	21.0654	20.5273	25.893	26.2436	8.35116	8.77574	5.27536	5.35719
Across two locations	TVu-17060	63.7421	64.2423	93.8682	93.981	13.548	12.1492	2093.25	2104.53	8.9111	7.18142	18.8575	14.2765	25.5448	24.4946	5.86801	5.34571	4.24069	3.93405
Across two locations	TVu-17179	62.6924	62.8925	93.2335	93.0772	13.7001	13.5298	2060.66	2037.27	15.3359	15.6964	21.2661	21.1622	25.3912	23.6967	7.45044	7.56495	5.20859	5.28336
Across two locations	TVu-17423	64.3828	65.0766	92.6621	92.018	13.6636	13.1681	1785.94	1528.91	12.7398	12.1927	21.7898	22.6648	25.2726	23.1796	7.32128	7.35966	5.04075	5.03383
Across two locations	TVu-17526	60.4533	59.7915	90.6834	89.084	13.8024	14.4069	2356.87	2623.03	13.9231	13.7904	22.0257	23.2721	28.5405	39.0991	6.79715	6.65028	4.73915	4.62893
Across two locations	TVu-17537	58.9948	57.6512	92.2003	91.3567	13.9114	15.3783	2172.69	2258.48	14.3403	14.3716	22.429	24.6271	25.2442	23.163	7.59194	7.74208	5.22151	5.29166
Across two locations	TVu-17553	60.5243	59.8343	91.9453	90.9864	13.83	14.5055	2168.9	2236.2	13.9075	13.8145	21.8389	22.5834	26.1989	27.5716	6.45473	6.17789	4.82515	4.75174
Across two locations	TVu-17565	64.5725	65.4279	94.2163	94.5211	13.8458	14.8447	1783.62	1525.47	11.247	10.218	20.6784	19.4863	25.1243	22.8885	6.65026	6.42931	4.78106	4.67344
Across two locations	TVu-17611	60.7367	59.9788	92.7053	92.0208	13.8488	14.8315	2350.73	2597.74	12.5212	11.8892	22.0557	23.4366	26.6909	29.9637	6.76946	6.58658	4.751	4.62996
Across two locations	TVu-17657	62.0963	61.9488	93.7349	93.7408	13.5642	12.2082	1892.38	1706.92	14.1274	14.0412	19.6289	16.4729	24.646	20.4784	7.75583	7.95766	5.24651	5.3179
Across two locations	TVu-17660	61.2271	60.8425	93.4826	93.4288	13.7246	13.6688	2091.36	2066.45	13.043	12.6328	21.1026	20.7169	25.5464	24.3753	6.62687	6.41488	4.85504	4.78861
Across two locations	TVu-17713	62.9134	63.1238	94.2576	94.6039	13.8596	14.8465	2253.16	2428.97	13.0937	12.7183	21.4514	21.7547	26.9986	31.6698	6.53842	6.29499	4.88405	4.82905
Across two locations	TVu-17721	59.6378	58.5426	90.8895	89.3151	13.7373	13.8186	2100.87	2132.22	11.7333	10.878	20.311	18.3579	26.5355	29.5393	6.56004	6.31079	4.71592	4.59278
Across two locations	TVu-17796	59.7716	58.7884	91.8413	90.8139	13.6436	13.0028	2071.62	2078.38	12.6013	12.0894	21.3767	21.565	25.2778	23.05	6.45364	6.1698	4.84425	4.77436
Across two locations	TVu-1785	64.1162	64.8407	96.6859	98.5097	13.6337	12.8453	1489.48	901.729	12.0981	11.2469	19.5497	16.3122	24.4302	18.9384	7.01203	6.94964	4.55832	4.3846
Across two locations	TVu-1797	62.133	62.02	93.6691	93.6581	13.5108	11.7693	1912.59	1794.17	13.6218	13.4319	18.3617	13.0007	23.5495	15.2088	6.45086	6.16247	4.62267	4.47044
Across two locations	TVu-1806	54.6901	51.6189	84.3372	79.0183	13.5964	12.4578	1397.34	730.954	11.7461	10.9763	19.5451	16.2663	26.3023	27.9047	6.60096	6.38743	4.48847	4.28557
Across two locations	TVu-1909	55.6511	52.902	86.8355	82.8656	13.7085	13.6115	1913.5	1746.89	12.7343	12.1209	19.954	17.4507	25.6797	25.4535	6.70166	6.50047	4.79181	4.68752
Across two locations	TVu-2098	63.7789	64.3178	94.356	94.7622	13.6934	13.4138	1728.67	1396.57	13.3946	13.0823	20.857	20.0135	25.6012	25.1066	6.57375	6.32913	4.67199	4.52632
Across two locations	TVu-22	61.9991	61.9867	93.3782	93.3294	13.7192	13.64	1523.53	1007.01	14.1049	13.9518	20.4708	18.9124	23.8988	16.7004	8.33426	8.76788	4.72992	4.61552
Across two locations	TVu-2656	57.329	55.3027	91.0619	89.5018	13.5453	12.0796	1748.24	1472.71	13.4426	13.1758	20.6346	19.381	25.3335	23.8083	7.26731	7.28855	4.96204	4.9293
Across two locations	TVu-2657	62.7568	62.783	94.4162	94.7089	13.7564	14.0415	2077.43	2082.58	15.3739	15.6002	22.9515	25.9743	26.6737	29.8366	7.4954	7.58014	5.34332	5.43705
Across two locations	TVu-2661	58.7449	57.2808	92.3363	91.5713	13.6951	13.4159	2526.44	2920.92	15.3083	15.5944	23.0482	26.1746	25.2887	23.2528	7.22737	7.24577	5.05713	5.06849
Across two locations	TVu-2665	61.0646	60.5148	93.7013	93.7482	13.7466	13.9191	2400.86	2663.8	15.5551	15.9168	21.2948	21.3627	25.9971	26.5301	6.62461	6.42008	4.75937	4.6639
Across two locations	TVu-267	58.3776	56.7158	92.93	92.4604	13.8428	14.7019	2090.78	2112.98	14.8913	15.0326	20.5141	18.8455	25.4062	23.7468	7.26361	7.29302	4.96105	4.93515
Across two locations	TVu-2685	63.6373	64.0591	94.2218	94.485	13.8499	14.7124	2052.88	1997.54	11.5023	10.6112	21.531	21.8835	25.781	25.8074	6.93049	6.82335	4.95758	4.92024
Across two locations	TVu-2687	65.603	66.8097	94.1577	94.384	13.7067	13.523	1608.33	1212.68	12.5596	11.9979	19.9044	17.4386	23.5937	15.4977	6.39389	6.09039	4.48938	4.28204
Across two locations	TVu-2692	61.4207	61.0536	91.416	90.0695	13.8305	14.6162	2089.48	2086.04	12.8936	12.4239	22.9695	25.9799	25.4305	23.9231	6.72522	6.53804	4.92109	4.86593
Across two locations	TVu-2693	59.3318	58.0924	91.5969	90.4196	13.8679	14.9649	2188.73	2297.31	11.2803	10.3445	20.4829	18.8582	26.3633	28.5847	6.21367	5.8322	4.5808	4.4073
Across two locations	TVu-2695	62.3781	62.3178	91.0466	89.4905	13.8274	14.6103	2130.26	2147.87	14.857	14.9773	21.0889	20.5947	26.8677	30.8882	6.71662	6.52337	4.87347	4.80254
Across two locations	TVu-2699	61.1439	60.5977	92.8688	92.3146	13.649	13.0446	1839.89	1631.87	12.8661	12.3981	19.4678	16.1607	26.8658	31.1403	6.9173	6.80416	4.78232	4.68245
Across two locations	TVu-2701	64.2887	65.0216	94.0735	94.2599	13.692	13.4029	2053.83	2023.72	11.4382	10.4595	21.5778	22.051	24.9001	21.5441	6.71878	6.52561	4.5473	4.35639
Across two locations	TVu-2706	63.9956	64.6792	97.6582	99.9791	13.5452	12.1378	1638.12	1260.02	13.1083	12.678	20.9783	20.4754	23.9914	17.5672	7.72774	7.92742	4.96253	4.93429
Across two locations	TVu-2714	59.2845	58.1638	90.125	88.1963	13.75	13.8702	2296.45	2454.77	12.2803	11.5979	20.4228	18.7182	26.5821	29.4597	6.8332	6.69881	4.90421	4.84954
Across two locations	TVu-2716	59.9975	59.1395	92.5498	91.912	13.7121	13.6159	1837.77	1611.75	11.9791	11.2257	20.407	18.6821	25.5249	24.1486	6.53739	6.29302	4.69344	4.56786
Across two locations	TVu-2720	60.7765	60.1381	92.7531	92.275	13.7779	14.158	2256.94	2423.93	13.3401	13.0135	22.4772	24.4719	24.9854	21.9653	6.54499	6.30378	4.74719	4.6397
Across two locations	TVu-273	65.3343	66.6002	96.3578	97.9457	13.8117	14.4528	1902.01	1729.53	14.7547	14.8912	22.2011	23.8795	25.2523	23.0755	6.60319	6.37164	4.6708	4.52829
Across two locations	TVu-2978	59.765	58.7635	94.724	95.3585	13.6166	12.714	2043.85	1985.96	10.9391	9.87066	21.2839	21.0668	26.4709	29.0612	6.09719	5.69722	4.37908	4.13691
Across two locations	TVu-3063	60.6721	60.0414	94.1103	94.437	13.669	13.1382	1565.33	1086.78	12.056	11.367	20.4545	18.9871	26.4093	28.8415	7.14227	7.1382	4.70996	4.59786
Across two locations	TVu-3064	64.0254	64.6112	96.033	97.3516	13.7162	13.5754	1683.37	1318.46	13.3416	13.0321	20.4772	18.8761	24.7596	20.8638	7.15943	7.14449	4.80095	4.70864
Across two locations	TVu-3067	62.4072	62.4243	95.2002	96.1015	13.5259	11.9438	1871.7	1679.16	14.8035	14.8948	20.4837	19.0146	25.5478	24.5414	6.85791	6.7164	4.80781	4.7112
Across two locations	TVu-3090	61.9981	61.8359	94.0863	94.3936	13.8893	15.1421	2332.53	2578.04	12.779	12.267	20.6372	19.3783	26.1354	27.302	6.7578	6.60843	4.61443	4.46262
Across two locations	TVu-3094	60.702	60.028	92.1101	91.2336	13.6487	13.0383	1709.62	1365.59	11.2027	10.202	20.1805	18.1791	24.9198	21.2686	6.16241	5.76782	4.31914	4.05215
Across two locations	TVu-3097	59.8531	58.7776	91.266	89.8533	13.6241	12.8325	1732.85	1426.72	13.2299	12.9097	20.666	19.5827	24.6145	20.3855	7.22417	7.2336	4.90996	4.86559
Across two locations	TVu-310	61.4602	60.9959	93.5347	93.3934	13.7881	14.3382	2310.51	2560.73	13.3066	12.9586	20.7231	19.639	25.3016	23.9552	7.13705	7.10609	5.13653	5.16809
Across two locations	TVu-3101	57.1894	55.1474	92.8865	92.4999	13.6472	13.0297	1375.17	768.191	15.5677	15.9442	19.7804	17.1326	23.8372	16.482	8.4502	8.92498	5.24946	5.33327
Across two locations	TVu-3217	67.9015	70.0072	94.1471	94.2981	13.6778	13.3178	1968	1861.89	9.31063	7.70555	20.6926	19.5516	24.5187	19.8192	6.34849	6.01777	4.42429	4.1849
Across two locations	TVu-322	64.3107	65.1265	92.131	91.3071	13.4783	11.2256	1955.3	1798.68	13.7984	13.5792	20.3217	18.0573	24.8205	20.4652	6.38029	6.02161	4.84477	4.75759
Across two locations	TVu-3224	66.2156	67.7564	94.8033	95.5617	13.8152	14.5218	1673.06	1266.22	11.5836	10.7382	23.2878	26.8623	25.6056	24.6542	5.89163	5.41372	4.34599	4.10009
Across two locations	TVu-3228	63.0858	63.4303	92.4249	91.7353	13.6657	13.2047	2030.73	1993.59	11.2774	10.372	19.9558	17.3353	25.3218	23.3419	6.83444	6.70011	4.80611	4.72636
Across two locations	TVu-3229	60.4867	59.6685	92.7611	92.1776	13.6586	13.0997	2383.28	2637.1	10.9946	9.90113	21.2678	21.0852	27.5478	33.9671	6.09458	5.65926	4.05139	3.66974
Across two locations	TVu-3231	62.7597	62.9443	93.9385	94.1722	13.6798	13.3293	2228.99	2341.36	13.1533	12.7397	22.1554	23.7373	24.616	20.1618	6.98869	6.9181	4.95443	4.92656
Across two locations	TVu-3233	58.0776	56.3976	92.4897	91.8401	13.6119	12.6855	1869.11	1664.97	12.3674	11.6941	20.2617	18.2493	25.9701	26.5225	6.2418	5.8667	4.52356	4.32532
Across two locations	TVu-3235	58.5822	57.0332	93.0199	92.606	13.8195	14.6328	1953.76	1832.2	11.5757	10.6261	21.7895	22.633	25.8449	25.8128	6.77508	6.59964	4.89736	4.82946
Across two locations	TVu-3243	63.325	63.6329	93.288	93.0388	13.7882	14.3296	1782.86	1548.03	11.4782	10.5548	21.5389	22.0556	25.4383	24.3669	6.73544	6.54799	4.68823	4.54927
Across two locations	TVu-3247	63.7635	64.3469	97.4476	99.6118	13.753	13.9143	1879.52	1692.47	12.844	12.4206	22.4974	24.5869	26.6546	29.8076	7.16843	7.15467	4.98271	4.9621
Across two locations	TVu-3248	62.3467	62.2832	94.799	95.409	13.7361	13.7792	2290.25	2480.91	13.6907	13.4287	21.6043	22.1703	26.3228	28.5656	7.30013	7.329	4.96731	4.92756
Across two locations	TVu-3249	62.6691	62.7978	94.3479	94.7414	13.7757	14.1807	1916.11	1782.57	13.3503	13.0397	21.1526	20.6606	25.6806	25.6191	7.23399	7.25155	4.6459	4.50282
Across two locations	TVu-3250	65.5051	66.7595	97.7824	100.131	13.7382	13.8827	1783.08	1561.37	12.7191	12.1341	20.9895	20.5815	25.5983	25.0769	7.04234	6.98338	4.81868	4.74262
Across two locations	TVu-3252	62.5259	62.5859	93.2279	92.9425	13.7837	14.214	2055.86	2055.69	12.168	11.4501	21.9284	22.885	25.5538	25.0086	6.85424	6.7073	4.69314	4.55203
Across two locations	TVu-3253	63.2137	63.4241	94.4177	94.7418	13.7791	14.2128	1681.39	1322.72	13.7672	13.4959	19.8138	16.9783	24.2874	18.6445	6.99833	6.89142	4.8407	4.74664
Across two locations	TVu-3254	63.1167	63.376	93.4655	93.3348	13.6652	13.1917	2130.89	2196.54	12.7046	12.1519	20.3314	18.6087	25.9422	26.4847	6.82988	6.69114	4.72163	4.60176
Across two locations	TVu-3257	60.7289	60.1466	91.6633	90.5914	13.7669	14.0409	2099.59	2092.11	13.3546	13.0049	21.9801	23.1835	26.4251	28.7157	7.11522	7.08933	5.05076	5.05412
Across two locations	TVu-3259	61.0647	60.5159	93.5379	93.4357	13.7575	14.0052	2413.68	2727.7	12.7477	12.2201	20.5099	18.9398	25.4884	24.2338	6.95612	6.85764	4.97998	4.95489
Across two locations	TVu-3261	62.1905	62.03	96.2604	97.701	13.7883	14.2693	1875.86	1721.27	14.9207	15.1128	21.5197	21.8714	26.3075	28.1954	7.25344	7.27614	5.0027	4.99297
Across two locations	TVu-3262	59.3746	58.1208	97.0419	98.8959	13.7123	13.5219	2246.27	2356.41	12.3629	11.7588	21.7785	22.5484	26.512	29.0308	7.28697	7.32843	4.77569	4.6753
Across two locations	TVu-3263	63.0504	63.2355	94.7817	95.3858	13.6365	12.938	2134.59	2197.74	13.3182	12.9581	20.8661	19.9742	25.6311	25.0233	6.90767	6.7851	5.1212	5.13667
Across two locations	TVu-3267	63.4447	63.9979	91.9965	91.1774	13.844	14.725	1615.4	1192.08	11.5467	10.6795	20.5465	19.1695	24.721	20.7905	7.32184	7.38306	4.87913	4.82645
Across two locations	TVu-328	60.7626	60.1078	94.7094	95.3387	13.6829	13.3117	1896.99	1736.63	13.1839	12.7846	20.9904	20.4271	24.9574	21.8784	7.06698	7.02115	5.00222	4.99339
Across two locations	TVu-3502	62.2465	62.1884	92.1594	91.303	13.688	13.3933	2480.2	2868.3	15.3509	15.6698	21.7852	22.6934	25.5669	24.9138	6.77879	6.6207	4.92485	4.88649
Across two locations	TVu-3504	61.7331	61.6118	93.8003	93.9965	13.7505	13.9045	2373.85	2661.48	12.8007	12.373	20.479	19.0214	26.8461	30.6331	6.68584	6.48809	4.79166	4.70473
Across two locations	TVu-3506	63.5846	64.0327	94.3552	94.7184	13.7571	13.951	1926.31	1787.29	12.7939	12.2997	21.8072	22.7018	25.602	24.7388	7.60141	7.75662	5.05128	5.05725
Across two locations	TVu-3508	60.7941	60.1321	92.4052	91.6742	13.8377	14.6345	2172.87	2248.08	12.3546	11.6859	22.1146	23.564	25.8111	25.7605	6.71431	6.52615	4.74783	4.62541
Across two locations	TVu-3509	63.112	63.4794	93.739	93.8555	13.7028	13.4566	2251.76	2383.14	12.2437	11.5518	21.0418	20.4352	24.9022	21.3439	6.57679	6.34389	4.69742	4.57038
Across two locations	TVu-3510	60.4475	59.7523	87.7672	84.487	13.7496	13.9231	1726.97	1390.02	11.1217	10.2076	20.3989	18.8388	24.6647	20.2344	6.79918	6.65963	4.67518	4.54487
Across two locations	TVu-3511	62.7962	62.9338	93.0939	92.8021	13.6817	13.2844	1660.36	1286.34	11.5075	10.6901	21.0242	20.4624	25.1726	23.2951	6.16001	5.77624	4.48606	4.28374
Across two locations	TVu-3515	63.5794	64.0062	94.3753	94.7335	13.7384	13.7517	2528.79	2929.32	13.5675	13.3223	21.1962	20.9194	25.8832	26.0333	6.89231	6.79752	4.86001	4.8011
Across two locations	TVu-3524	62.9064	63.0859	91.9272	90.9442	13.8743	15.1163	2706.33	3306.15	15.2209	15.4182	23.7964	28.3236	28.0728	37.1503	6.82031	6.65564	4.77683	4.66583
Across two locations	TVu-3525	61.355	60.9847	91.8219	90.7941	13.7346	13.7737	2127.62	2158.39	12.8331	12.3684	20.4317	18.8649	26.2694	28.1447	6.65678	6.45435	4.72518	4.60975
Across two locations	TVu-3526	60.0517	59.1161	92.305	91.5328	13.7851	14.2405	2118.68	2135.66	11.5926	10.7601	20.9962	20.427	26.0219	26.9096	6.17164	5.78532	4.55605	4.37488
Across two locations	TVu-3532	61.6892	61.3344	94.4339	94.8512	13.8275	14.6001	1972.54	1885.39	13.4048	13.1083	19.9747	17.475	25.5282	24.6465	6.69764	6.51715	4.70502	4.58624
Across two locations	TVu-3533	65.6331	66.9591	96.0581	97.4541	13.8147	14.4901	1885.85	1712.01	13.8114	13.6718	19.917	17.2627	24.7062	20.7806	7.34181	7.40255	5.09781	5.12521
Across two locations	TVu-3534	62.8673	63.063	97.0139	98.9746	13.8278	14.5613	2325.54	2529.15	15.1038	15.33	21.2998	21.2127	26.1566	27.1678	7.38895	7.46833	5.39907	5.53553
Across two locations	TVu-3535	66.8826	68.6888	99.8531	103.422	13.6704	13.1953	1873.6	1666.03	13.34	13.0183	23.1087	26.1758	25.7996	25.8204	6.97309	6.8871	4.77428	4.6741
Across two locations	TVu-3540	61.2932	60.9672	92.2184	91.4686	13.7665	14.0158	1928.46	1775.78	12.0583	11.4061	20.9572	20.386	25.4921	24.4509	6.67354	6.48672	4.9062	4.86422
Across two locations	TVu-3550	60.7324	60.0934	92.8629	92.4537	13.7027	13.5197	2197.64	2289.58	15.5073	15.8373	21.4774	21.9342	24.5876	19.5923	8.01496	8.34063	5.18473	5.24173
Across two locations	TVu-361	57.0016	54.9336	90.4022	88.5562	13.7627	14.0767	1738.95	1474.14	11.0577	10.0942	20.8806	20.3101	26.019	26.9121	6.49586	6.23751	4.31957	4.0586
Across two locations	TVu-375	62.7159	62.7714	92.9788	92.5299	13.7848	14.2736	2041.84	2058.22	13.684	13.4738	20.6308	19.4118	25.3071	24.0128	6.58769	6.35571	4.77763	4.67885
Across two locations	TVu-387	62.4265	62.4435	93.9127	94.0449	13.8631	14.9325	2070.36	2041.89	13.2067	12.8284	20.9673	20.1133	25.6134	24.7772	6.92298	6.82522	5.03645	5.03672
Across two locations	TVu-391	60.0823	59.2029	92.0195	91.0956	13.7289	13.7852	2362.37	2614.66	14.3055	14.2564	21.8302	22.6452	27.277	32.8614	7.12278	7.09964	4.984	4.97117
Across two locations	TVu-406	60.445	59.7041	93.3755	93.2205	13.749	13.9136	2276.68	2457.87	12.1236	11.4429	20.7211	19.674	26.196	27.3173	6.96473	6.88441	4.86618	4.80583
Across two locations	TVu-416	62.0164	61.7904	91.91	90.8467	13.7322	13.7407	1832.74	1619.55	12.6254	12.0861	23.4063	27.1386	25.8854	26.4999	6.86782	6.75126	4.89781	4.84927
Across two locations	TVu-4568	59.6264	58.5566	90.622	88.9286	13.7356	13.8228	2190.71	2279.17	13.6886	13.4791	21.0137	20.5371	26.5059	29.2193	6.73228	6.56714	4.88884	4.83705
Across two locations	TVu-46	61.2729	60.7131	95.0507	95.7524	13.6585	13.0806	2157.32	2212.72	14.7543	14.8115	21.5707	21.975	26.5291	29.4773	7.41249	7.48532	5.04402	5.03868
Across two locations	TVu-692	61.3601	60.8621	91.3508	89.9871	13.5769	12.4306	2162.47	2252.84	15.8334	16.2277	20.2201	18.2086	25.0253	22.0618	7.58385	7.72406	5.40725	5.54161
Across two locations	TVu-81	66.2914	67.8208	95.4882	96.5378	13.7374	13.806	2537.07	2978.49	11.787	11.0332	22.4908	24.6945	26.6994	30.0858	6.16035	5.77441	4.4811	4.27291
Across two locations	TVu-972	57.7967	56.0704	87.0486	83.3574	13.7675	14.0933	1757.82	1452.71	11.1703	10.178	21.0586	20.4957	26.3529	28.4168	6.09671	5.67855	4.23507	3.94001
Across two locations	TVu-990	66.9816	68.7875	94.5985	95.1228	13.7476	13.8663	1950.85	1855.42	13.3412	13.0048	22.2455	24.0664	26.4242	29.2727	7.00079	6.93087	5.00076	4.98656
Across two locations	TVu-993	60.7735	60.272	91.3312	90.0601	13.588	12.4753	1852.55	1643.35	14.091	14.0221	19.9757	17.4625	25.0064	22.1077	6.84857	6.723	4.88958	4.84215
Across two locations	TVx-3236	62.198	62.0402	93.186	92.8363	13.5424	12.0525	2034.67	2014.48	11.2902	10.344	21.7867	22.5315	25.5643	24.4258	6.72378	6.55204	4.63588	4.49102
Across two locations	TZcp34	62.3538	62.2944	89.4361	87.0131	13.8844	15.1648	2054.93	2065.67	12.6367	12.1243	23.5044	27.5756	25.9261	26.4689	6.64169	6.43983	4.67184	4.54023
Across two locations	TZcp43	60.4804	59.7744	92.0647	91.1781	13.7918	14.2943	2076.2	2048.39	14.7403	14.8782	21.9777	22.908	25.8438	25.6718	7.88758	8.15949	5.29617	5.39954
Across two locations	TZcp5	60.9917	60.5011	89.7503	87.6233	13.8862	15.0237	2420.41	2720.46	15.0887	15.3189	22.6162	24.8323	26.6204	29.6922	6.87807	6.75798	4.9578	4.92448
Across two locations	TZcp50	66.2472	67.7227	97.3726	99.4564	13.859	14.9158	1924.84	1795.14	12.8001	12.2667	21.4194	21.6361	24.7284	21.0705	6.43358	6.13354	4.52614	4.32629
Across two locations	TZcp67	63.562	64.0092	93.0142	92.5889	13.9385	15.6184	1924.55	1786.36	16.2652	16.7734	22.0888	23.5381	24.4584	19.1497	7.6068	7.74079	5.12043	5.13777
Across two locations	TZcp70	62.2304	62.1908	93.6341	93.6254	14.0761	16.7475	2154.59	2251.42	13.4264	13.2294	21.858	23.0352	25.7647	25.8184	7.13255	7.1216	5.01821	5.02239
Across two locations	TZcp84	72.5208	76.6332	100.143	103.908	13.4787	11.2952	1667.59	1201	15.7564	16.3371	20.0888	17.0714	23.8996	14.8699	6.85016	6.66028	4.63339	4.40784
Across two locations	TZcp95	61.6886	61.363	92.5934	91.9577	13.894	15.1903	2032.48	1963.68	13.2748	12.9009	21.2797	21.0578	25.9259	26.3736	7.1975	7.19745	4.93882	4.90394
Across two locations	UAM09-1046-6-1	59.0799	57.7611	92.4515	91.7394	13.5687	12.3038	2184.67	2268.37	16.6292	17.2927	20.8552	20.1572	25.9182	26.4068	7.86796	8.11731	5.24139	5.31539
Across two locations	UAM09-1051-1	59.8796	58.8895	93.3688	93.2089	13.6166	12.681	2345.66	2583.2	15.0327	15.2459	21.8572	22.7739	26.1005	27.0166	7.77693	7.98821	5.07935	5.089
Across two locations	UAM14-126-19-2	59.6008	58.4695	92.6268	92.0083	13.6252	12.8429	2420.62	2727.59	18.2925	19.4813	22.79	25.7054	25.9928	26.7228	7.93266	8.2114	5.43889	5.5826
Across two locations	V1-F3	59.8556	58.7945	90.6496	88.8894	13.7817	14.2461	2133.62	2199.77	12.0575	11.2729	20.458	18.7421	26.7521	30.5343	6.52759	6.26461	4.68603	4.54834
Across two locations	V3-F0	60.8678	60.3114	96.0111	97.4011	13.873	14.952	2208.01	2286.4	14.1166	14.0055	22.5727	24.6089	26.0112	26.5917	7.2176	7.22445	5.19663	5.25094
Across two locations	Vuli-1	60.3853	59.6554	90.3227	88.4555	13.8513	14.8067	2390.68	2684.66	14.4369	14.4852	21.156	20.9635	26.7592	30.4444	6.79306	6.65019	4.85619	4.79183
Across two locations	Vuli-2	60.6182	60.0175	90.8554	89.3119	13.9196	15.4188	2585.8	3029.69	12.3393	11.7056	23.0311	26.1002	27.3563	33.2899	6.53024	6.2838	4.73121	4.61614
Across two locations	Vuli-AR 1	59.3386	58.1179	93.9333	94.079	13.736	13.7561	2186.28	2300.6	13.2707	12.9559	21.8142	22.6287	26.1953	27.7728	6.9774	6.90499	4.96593	4.94348
Across two locations	Vuli-AR 2	60.3329	59.4674	93.9656	94.0097	13.6772	13.2304	1996.2	1926.64	13.8854	13.6774	21.573	21.9788	25.5997	24.9027	6.92123	6.8143	4.73067	4.61212
