# Supplementary material for: Cowpea genetic diversity, population structure and genome-wide association studies in Malawi: insights for breeding programs
Source: Front Plant Sci. 2025 Jan 20;15:1461631. doi: 10.3389/fpls.2024.1461631 (PMC11788394; doi:10.3389/fpls.2024.1461631)
Supplement: Supplementary file 9 [file Table5.xlsx]

## Sheet: Sheet1
Table S5. Single nucleotide polymorphisms (SNPs) significantly associated with six traits evaluated
Trait	SNP	Allele	Chr	Position	SNP effect	p-value
Days to 50% flowering	2_49803	C/A	VU03	48008318	0.84	1.51e-05
Days to 50% flowering	2_28299	G/A	VU10	40518950	0.92	4.99e-07
Days to 90% maturity	2_49803	C/A	VU03	48008318	0.85	8.09e-06
Days to 90% maturity	2_18617	C/T	VU04	1274572	-0.5	9.16e-07
Days to 90% maturity	2_50822	T/C	VU04	40470581	-1.69	4.6e-07
Days to 90% maturity	2_50684	G/A	VU08	26860583	-0.97	2.48e-06
Grain yield	2_00383	C/T	VU10	38612317	-60.76	1.43e-05
Seed length	2_14691	C/T	VU03	51498849	0.12	1.04e-05
Seed length	2_46654	C/T	VU04	7712996	0.22	2.04e-07
Seed length	2_17861	G/A	VU08	35389996	0.11	1.56e-05
Seed length	2_05808	A/C	VU11	29429763	0.13	1.61e-06
Seed width	2_22597	C/T	VU09	43096254	-0.01	5.09e-06
Pods per plant	2_43539	G/A	VU01	9793961	0.22	5.46e-07
Pods per plant	2_10455	A/G	VU03	39618312	-0.33	1.79e-05
Pods per plant	2_41903	G/A	VU04	26223984	0.22	2.06e-06
Pods per plant	2_09189	T/C	VU10	36275270	0.19	6.11e-06
