# Supplementary material for: Cowpea genetic diversity, population structure and genome-wide association studies in Malawi: insights for breeding programs
Source: Frontiers journal article supplement (doi:10.3389/fpls.2024.1461631), 2025-01-20
Supplement: Table_1.xls [file Table_1.xls]

## Sheet: Table S1
Table S1. Cowpea genotypes used for the study and their origin
Genotype	Type of genotype	Country of origin	Population
Aloka Local	Cultivar	Nigeria	West Africa
B301	Cultivar	IITA-Nigeria	West Africa
Danila	Cultivar	Nigeria	West Africa
Fahari	Cultivar	Tanzania	East Africa
GUARIBA	Cultivar	Mozambique	Southern Africa
INIA-36	Cultivar	Mozambique	Southern Africa
INIA-73	Cultivar	Mozambique	Southern Africa
IT00K-1263	Cultivar	Malawi	Southern Africa
IT04K-108	Breeding line	IITA-Nigeria	West Africa
IT04K-227-4	Breeding line	IITA-Nigeria	West Africa
IT04K-321-1	Breeding line	IITA-Nigeria	West Africa
IT06K-108	Breeding line	IITA-Nigeria	West Africa
IT07K-210-1-1	Breeding line	IITA-Nigeria	West Africa
IT07K-230-2-9	Breeding line	IITA-Nigeria	West Africa
IT07K-297-13	Breeding line	IITA-Nigeria	West Africa
IT07K-299-6	Breeding line	IITA-Nigeria	West Africa
IT07K-318-33	Breeding line	IITA-Nigeria	West Africa
IT08K-150-12	Breeding line	IITA-Nigeria	West Africa
IT08K-180-11	Breeding line	IITA-Nigeria	West Africa
IT09K-227-9	Breeding line	IITA-Nigeria	West Africa
IT10K-817-1A	Breeding line	IITA-Nigeria	West Africa
IT10K-817-1B	Breeding line	IITA-Nigeria	West Africa
IT10K-817-3	Breeding line	IITA-Nigeria	West Africa
IT10K-817-7	Breeding line	IITA-Nigeria	West Africa
IT10K-834-3	Breeding line	IITA-Nigeria	West Africa
IT10K-973-1	Breeding line	IITA-Nigeria	West Africa
IT10K-985-3	Breeding line	IITA-Nigeria	West Africa
IT13K-1079-3	Breeding line	IITA-Nigeria	West Africa
IT-18	Breeding line	IITA-Nigeria	West Africa
IT82E-16	Cultivar	Malawi	Southern Africa
IT835-728-5	Breeding line	IITA-Nigeria	West Africa
IT90K-76	Breeding line	IITA-Nigeria	West Africa
IT93K-452-1	Breeding line	IITA-Nigeria	West Africa
IT97K-1069-6	Breeding line	IITA-Nigeria	West Africa
IT97K-390-2	Breeding line	IITA-Nigeria	West Africa
IT97K-499-35	Breeding line	IITA-Nigeria	West Africa
IT98K-131-2	Breeding line	IITA-Nigeria	West Africa
IT98K-205-8	Breeding line	IITA-Nigeria	West Africa
IT98K-390-2	Breeding line	IITA-Nigeria	West Africa
IT98K-503-1	Breeding line	IITA-Nigeria	West Africa
IT99K-1122	Breeding line	IITA-Nigeria	West Africa
IT99K-241-2	Breeding line	IITA-Nigeria	West Africa
IT99K-407-8	Breeding line	IITA-Nigeria	West Africa
IT99K-409-8	Breeding line	IITA-Nigeria	West Africa
IT99K-529-1	Breeding line	IITA-Nigeria	West Africa
IT99K-573-1-1	Breeding line	IITA-Nigeria	West Africa
IT99K-573-2-1	Breeding line	IITA-Nigeria	West Africa
IT99K-7-21-2-2-1	Breeding line	IITA-Nigeria	West Africa
Mkanakaufiti	Cultivar	Malawi	Southern Africa
MWcp03	Landrace	Malawi	Southern Africa
MWcp04	Landrace	Malawi	Southern Africa
MWcp05	Landrace	Malawi	Southern Africa
MWcp06	Landrace	Malawi	Southern Africa
MWcp07	Landrace	Malawi	Southern Africa
MWcp08	Landrace	Malawi	Southern Africa
MWcp09	Landrace	Malawi	Southern Africa
MWcp10	Landrace	Malawi	Southern Africa
MWcp11	Landrace	Malawi	Southern Africa
MWcp15	Landrace	Malawi	Southern Africa
MWcp17	Landrace	Malawi	Southern Africa
MWcp18	Landrace	Malawi	Southern Africa
MWcp19	Landrace	Malawi	Southern Africa
MWcp20	Landrace	Malawi	Southern Africa
MWcp21	Landrace	Malawi	Southern Africa
MWcp2227	Landrace	Malawi	Southern Africa
MWcp2232	Landrace	Malawi	Southern Africa
MWcp23	Landrace	Malawi	Southern Africa
MWcp24	Landrace	Malawi	Southern Africa
MWcp25	Landrace	Malawi	Southern Africa
MWcp26	Landrace	Malawi	Southern Africa
MWcp27	Landrace	Malawi	Southern Africa
MWcp28	Landrace	Malawi	Southern Africa
MWcp29	Landrace	Malawi	Southern Africa
MWcp30	Landrace	Malawi	Southern Africa
MWcp305	Landrace	Malawi	Southern Africa
MWcp309	Landrace	Malawi	Southern Africa
MWcp31	Landrace	Malawi	Southern Africa
MWcp32	Landrace	Malawi	Southern Africa
MWcp3254	Landrace	Malawi	Southern Africa
MWcp33	Landrace	Malawi	Southern Africa
MWcp34	Landrace	Malawi	Southern Africa
MWcp35	Landrace	Malawi	Southern Africa
MWcp36	Landrace	Malawi	Southern Africa
MWcp37	Landrace	Malawi	Southern Africa
MWcp38	Landrace	Malawi	Southern Africa
MWcp39	Landrace	Malawi	Southern Africa
MWcp40	Landrace	Malawi	Southern Africa
MWcp41	Landrace	Malawi	Southern Africa
MWcp43	Landrace	Malawi	Southern Africa
MWcp44	Landrace	Malawi	Southern Africa
MWcp45	Landrace	Malawi	Southern Africa
MWcp46	Landrace	Malawi	Southern Africa
MWcp47	Landrace	Malawi	Southern Africa
MWcp479	Landrace	Malawi	Southern Africa
MWcp48	Landrace	Malawi	Southern Africa
MWcp49	Landrace	Malawi	Southern Africa
MWcp50	Landrace	Malawi	Southern Africa
MWcp51	Landrace	Malawi	Southern Africa
MWcp52	Landrace	Malawi	Southern Africa
MWcp53	Landrace	Malawi	Southern Africa
MWcp54	Landrace	Malawi	Southern Africa
MWcp55	Landrace	Malawi	Southern Africa
MWcp56	Landrace	Malawi	Southern Africa
MWcp57	Landrace	Malawi	Southern Africa
MWcp59	Landrace	Malawi	Southern Africa
MWcp60	Landrace	Malawi	Southern Africa
MWcp601	Landrace	Malawi	Southern Africa
MWcp61	Landrace	Malawi	Southern Africa
MWcp62	Landrace	Malawi	Southern Africa
MWcp63	Landrace	Malawi	Southern Africa
MWcp64	Landrace	Malawi	Southern Africa
MWcp645	Landrace	Malawi	Southern Africa
MWcp65	Landrace	Malawi	Southern Africa
MWcp66	Landrace	Malawi	Southern Africa
MWcp67	Landrace	Malawi	Southern Africa
MWcp68	Landrace	Malawi	Southern Africa
MWcp69	Landrace	Malawi	Southern Africa
MWcp71	Landrace	Malawi	Southern Africa
MWcp72	Landrace	Malawi	Southern Africa
MWcp73	Landrace	Malawi	Southern Africa
MWcp76	Landrace	Malawi	Southern Africa
MWcp77	Landrace	Malawi	Southern Africa
MWcp91	Landrace	Malawi	Southern Africa
MZcp 011	Landrace	Mozambique	Southern Africa
MZcp 012	Landrace	Mozambique	Southern Africa
MZcp 013	Landrace	Mozambique	Southern Africa
MZcp 014	Landrace	Mozambique	Southern Africa
MZcp 015	Landrace	Mozambique	Southern Africa
MZcp 016	Landrace	Mozambique	Southern Africa
MZcp 020	Landrace	Mozambique	Southern Africa
MZcp 021	Landrace	Mozambique	Southern Africa
MZcp 022	Landrace	Mozambique	Southern Africa
MZcp 023	Landrace	Mozambique	Southern Africa
MZcp 024	Landrace	Mozambique	Southern Africa
MZcp 025	Landrace	Mozambique	Southern Africa
MZcp 026	Landrace	Mozambique	Southern Africa
MZcp 030	Landrace	Mozambique	Southern Africa
MZcp 032	Landrace	Mozambique	Southern Africa
MZcp 044	Landrace	Mozambique	Southern Africa
MZcp 045	Landrace	Mozambique	Southern Africa
MZcp 046	Landrace	Mozambique	Southern Africa
Raha 1	Cultivar	Tanzania	East Africa
Raha 2	Cultivar	Tanzania	East Africa
Sanzi	Cultivar	Ghana	West Africa
Sudani 1	Cultivar	Malawi	Southern Africa
Tumaini	Cultivar	Tanzania	East Africa
TVu-10008	Landrace	Unknown	Unknown
TVu-1002	Landrace	USA	America
TVu-10035	Landrace	Nigeria	West Africa
TVu-1006	Landrace	USA	America
TVu-1007	Landrace	USA	America
TVu-1010	Landrace	USA	America
TVu-1015	Landrace	USA	America
TVu-10169	Landrace	India	Asia
TVu-10180	Landrace	India	Asia
TVu-1042	Landrace	Unknown	Unknown
TVu-10987	Landrace	Benin	West Africa
TVu-11372	Landrace	Cameroon	Central Africa
TVu-1143	Landrace	USA	America
TVu-1146	Landrace	USA	America
TVu-1149	Landrace	USA	America
TVu-11674	Landrace	Zambia	Southern Africa
TVu-1177	Landrace	Uganda	East Africa
TVu-1185	Landrace	Uganda	East Africa
TVu-12256	Landrace	Niger	West Africa
TVu-13265	Landrace	USA	America
TVu-13413	Landrace	Zambia	Southern Africa
TVu-13600	Landrace	Botswana	Southern Africa
TVu-14004	Landrace	Zambia	Southern Africa
TVu-14528	Landrace	Senegal	West Africa
TVu-1460	Landrace	Unknown	Unknown
TVu-1472	Landrace	Argentina	America
TVu-1473	Landrace	India	Asia
TVu-14745	Landrace	Botswana	Southern Africa
TVu-1478	Landrace	South Africa	Southern Africa
TVu-1482	Landrace	USSR	Europe
TVu-14828	Landrace	Senegal	West Africa
TVu-1483	Landrace	USSR	Europe
TVu-1491	Landrace	USA	America
TVu-1527	Landrace	Unknown	Unknown
TVu-154	Landrace	Nigeria	West Africa
TVu-15462	Landrace	Zimbabwe	Southern Africa
TVu-15631	Landrace	Nigeria	West Africa
TVu-15693	Landrace	Nigeria	West Africa
TVu-15898	Landrace	Ghana	West Africa
TVu-16325	Landrace	Italy	Europe
TVu-16664	Landrace	Uganda	East Africa
TVu-16816	Landrace	Cameroon	Central Africa
TVu-16829	Landrace	Unknown	Unknown
TVu-17060	Landrace	Zambia	Southern Africa
TVu-17179	Landrace	Nigeria	West Africa
TVu-17423	Landrace	Nigeria	West Africa
TVu-17474	Landrace	Unknown	Unknown
TVu-17526	Landrace	Unknown	Unknown
TVu-17537	Landrace	Unknown	Unknown
TVu-17553	Landrace	Unknown	Unknown
TVu-17565	Landrace	Unknown	Unknown
TVu-17657	Landrace	Unknown	Unknown
TVu-17660	Landrace	Unknown	Unknown
TVu-17713	Landrace	Unknown	Unknown
TVu-17721	Landrace	Unknown	Unknown
TVu-17796	Landrace	Nigeria	West Africa
TVu-1785	Landrace	India	Asia
TVu-1797	Landrace	USA	America
TVu-1806	Landrace	South Africa	Southern Africa
TVu-1909	Landrace	Hungary	Europe
TVu-2098	Breeding line	IITA-Nigeria	West Africa
TVu-22	Landrace	Philippines	Asia
TVu-2656	Landrace	South Africa	Southern Africa
TVu-2657	Landrace	South Africa	Southern Africa
TVu-2661	Landrace	South Africa	Southern Africa
TVu-2665	Landrace	South Africa	Southern Africa
TVu-267	Landrace	USA	America
TVu-2685	Landrace	India	Asia
TVu-2687	Landrace	India	Asia
TVu-2692	Landrace	India	Asia
TVu-2693	Landrace	India	Asia
TVu-2695	Landrace	India	Asia
TVu-2699	Landrace	India	Asia
TVu-2701	Landrace	India	Asia
TVu-2706	Landrace	India	Asia
TVu-2714	Landrace	India	Asia
TVu-2716	Landrace	India	Asia
TVu-2720	Landrace	India	Asia
TVu-273	Landrace	USA	America
TVu-2978	Landrace	India	Asia
TVu-3063	Landrace	India	Asia
TVu-3064	Landrace	India	Asia
TVu-3067	Landrace	India	Asia
TVu-3090	Landrace	India	Asia
TVu-3094	Landrace	India	Asia
TVu-3097	Landrace	India	Asia
TVu-310	Landrace	USA	America
TVu-3101	Landrace	India	Asia
TVu-3217	Landrace	India	Asia
TVu-322	Landrace	USA	America
TVu-3224	Landrace	India	Asia
TVu-3228	Landrace	India	Asia
TVu-3229	Landrace	India	Asia
TVu-3231	Landrace	India	Asia
TVu-3233	Landrace	India	Asia
TVu-3235	Landrace	India	Asia
TVu-3243	Landrace	India	Asia
TVu-3247	Landrace	India	Asia
TVu-3248	Landrace	India	Asia
TVu-3249	Landrace	India	Asia
TVu-3250	Landrace	India	Asia
TVu-3252	Landrace	India	Asia
TVu-3253	Landrace	India	Asia
TVu-3254	Landrace	India	Asia
TVu-3257	Landrace	India	Asia
TVu-3259	Landrace	India	Asia
TVu-3261	Landrace	India	Asia
TVu-3262	Landrace	India	Asia
TVu-3263	Landrace	India	Asia
TVu-3267	Landrace	India	Asia
TVu-328	Landrace	USA	America
TVu-3502	Landrace	India	Asia
TVu-3504	Landrace	India	Asia
TVu-3506	Landrace	India	Asia
TVu-3508	Landrace	India	Asia
TVu-3509	Landrace	India	Asia
TVu-3510	Landrace	India	Asia
TVu-3511	Landrace	India	Asia
TVu-3515	Landrace	India	Asia
TVu-3524	Landrace	India	Asia
TVu-3525	Landrace	India	Asia
TVu-3526	Landrace	India	Asia
TVu-3532	Landrace	India	Asia
TVu-3533	Landrace	India	Asia
TVu-3534	Landrace	India	Asia
TVu-3535	Landrace	India	Asia
TVu-3540	Landrace	India	Asia
TVu-3550	Landrace	India	Asia
TVu-361	Landrace	USA	America
TVu-375	Landrace	South Africa	Southern Africa
TVu-387	Landrace	USA	America
TVu-391	Landrace	Nigeria	West Africa
TVu-406	Landrace	USA	America
TVu-416	Landrace	USA	America
TVu-4568	Landrace	Nigeria	West Africa
TVu-46	Landrace	Nigeria	West Africa
TVu-692	Landrace	Hungary	Europe
TVu-81	Landrace	South Africa	Southern Africa
TVu-972	Landrace	Nigeria	West Africa
TVu-990	Landrace	South Africa	Southern Africa
TVu-993	Landrace	USA	America
TVx-3236	Cultivar	IITA-Nigeria	West Africa
TZcp34	Landrace	Tanzania	East Africa
TZcp43	Landrace	Tanzania	East Africa
TZcp5	Landrace	Tanzania	East Africa
TZcp50	Landrace	Tanzania	East Africa
TZcp67	Landrace	Tanzania	East Africa
TZcp70	Landrace	Tanzania	East Africa
TZcp84	Landrace	Tanzania	East Africa
TZcp95	Landrace	Tanzania	East Africa
UAM09-1046-6-1	Breeding line	IITA-Nigeria	West Africa
UAM09-1051-1	Breeding line	IITA-Nigeria	West Africa
UAM14-126-19-2	Breeding line	IITA-Nigeria	West Africa
V1-F3	Cultivar	Mozambique	Southern Africa
V3-F0	Cultivar	Mozambique	Southern Africa
Vuli-1	Cultivar	Tanzania	East Africa
Vuli-2	Cultivar	Tanzania	East Africa
Vuli-AR 1	Cultivar	Tanzania	East Africa
Vuli-AR 2	Cultivar	Tanzania	East Africa
