# Supplementary material for: Cowpea genetic diversity, population structure and genome-wide association studies in Malawi: insights for breeding programs
Source: Frontiers journal article supplement (doi:10.3389/fpls.2024.1461631), 2025-01-20
Supplement: Table_4.xls [file Table_4.xls]

## Sheet: Table S3
Table S4. Cluster sizes and membership
Genotype	Populatio	Cluster	Proportion_assign_cluster.1	Proportion_assign_cluster.2	Proportion_assign_cluster.3	Proportion_assign_cluster.4	Proportion_assign_cluster.5	Proportion_assign_cluster.6	Proportion_assign_cluster.7	Proportion_assign_cluster.8	Proportion_assign_cluster.9
Fahari	East Africa	1	1	9.19e-11	7.11e-16	1.64e-23	5.01e-10	5.23e-21	5.75e-15	4.61e-08	9.65e-95
GUARIBA	Southern Africa	1	0.999999	7.53e-12	2.03e-27	8.18e-07	5.69e-13	1.32e-27	2e-12	1.99e-10	1.04e-81
INIA-36	Southern Africa	1	1	2.26e-11	3.44e-21	1.41e-07	1.21e-12	9.82e-30	9.61e-18	2.12e-13	1.07e-94
IT00K-1263	Southern Africa	1	1	2.19e-11	6.59e-14	1.67e-21	1.13e-10	6.51e-20	1.16e-14	1.18e-07	1.42e-88
IT04K-108	West Africa	1	1	9.02e-08	4.46e-24	3.3e-22	2.05e-08	1.1e-19	2.25e-14	3.94e-09	9.25e-90
IT04K-321-1	West Africa	1	1	6.27e-08	3.08e-26	1.05e-23	2.54e-08	1.42e-20	2.28e-13	1.38e-08	6.31e-93
IT06K-108	West Africa	1	0.999997	4.64e-10	4.98e-28	2.72e-06	1.09e-13	1.19e-26	3.1e-17	4.34e-12	4.58e-91
IT09K-227-9	West Africa	1	1	5.69e-10	8.06e-27	3.81e-08	5.57e-12	8.06e-22	1.09e-12	1.19e-09	5.24e-72
IT-18	West Africa	1	1	1.11e-09	2.53e-22	1.64e-22	7.45e-08	1.81e-25	7.46e-13	4.85e-10	1.25e-95
IT97K-1069-6	West Africa	1	0.999998	6.06e-14	7.77e-09	4.13e-18	1.77e-13	1.17e-19	3.75e-15	1.73e-06	1.38e-85
IT97K-390-2	West Africa	1	1	9.76e-08	5.58e-24	2.3e-22	2.25e-08	8.92e-20	1.62e-14	3.28e-09	2.12e-90
IT98K-390-2	West Africa	1	1	6.5e-13	2.61e-14	1.1e-10	2.89e-16	8.72e-19	4.74e-18	1.76e-07	1.57e-84
IT99K-1122	West Africa	1	0.999903	1.38e-07	9.21e-22	6.31e-24	9.65e-05	1.8e-25	2.81e-13	3.17e-12	5.55e-93
IT99K-407-8	West Africa	1	1	4.47e-08	6.58e-24	3.02e-22	8.55e-09	1.08e-19	2.31e-14	7.87e-09	1.86e-90
IT99K-409-8	West Africa	1	1	7.04e-08	3.24e-24	2.12e-23	2.62e-08	1.66e-19	6.51e-14	1.17e-08	1.61e-90
MWcp06	Southern Africa	1	1	1.23e-09	5.64e-20	4.65e-23	4.44e-10	2.39e-19	1.1e-14	1.1e-07	1.84e-92
MWcp11	Southern Africa	1	1	1.02e-09	5.49e-20	5.55e-23	3.69e-10	2.22e-19	1.29e-14	1.29e-07	2.16e-92
MWcp18	Southern Africa	1	1	1.29e-08	8.11e-21	1.85e-23	2.25e-09	2.24e-18	4.31e-15	4.24e-08	2.09e-91
MWcp2227	Southern Africa	1	1	4.3e-10	1.03e-23	2.52e-21	2.96e-10	1.85e-20	3.38e-12	4.18e-07	3.89e-88
MWcp2232	Southern Africa	1	0.999959	3.99e-05	5.62e-14	2.83e-25	1.5e-06	6.2e-16	1.33e-21	3.3e-12	1.55e-95
MWcp25	Southern Africa	1	1	1.14e-09	6.18e-20	6.19e-23	4.01e-10	2e-19	1.01e-14	1.03e-07	1.63e-92
MWcp27	Southern Africa	1	1	5.03e-10	1.31e-19	7.59e-22	1.62e-10	5.56e-20	7.7e-15	7.26e-08	2.44e-92
MWcp305	Southern Africa	1	1	1.08e-07	4.83e-24	1.84e-22	2.34e-08	1.64e-19	1.98e-14	4.25e-09	6.6e-90
MWcp309	Southern Africa	1	1	5.2e-09	1.13e-17	5.48e-26	3.62e-09	7.15e-18	1.63e-15	1.13e-07	4.16e-94
MWcp31	Southern Africa	1	0.999998	1.68e-06	6.28e-25	3.04e-22	5.62e-08	6.07e-19	5.97e-16	4.83e-10	1.75e-91
MWcp3254	Southern Africa	1	0.999999	3.35e-10	8.77e-24	2.15e-21	2.64e-10	1.39e-20	4.72e-12	5.19e-07	2.64e-88
MWcp38	Southern Africa	1	0.996259	0.00356095	1.07e-23	8.67e-24	0.000180011	1.36e-19	1.48e-19	3.89e-14	4.84e-96
MWcp41	Southern Africa	1	1	1.13e-09	7.13e-20	5.48e-23	3.72e-10	2.69e-19	9.7e-15	1.18e-07	1.9e-92
MWcp479	Southern Africa	1	1	1.65e-09	9.08e-23	5.79e-21	1.44e-10	1.48e-22	7.24e-16	3.71e-09	2.47e-99
MWcp56	Southern Africa	1	0.998417	6.62e-05	1.24e-20	4.94e-30	0.00151718	1.62e-19	4.31e-16	1.38e-11	1.03e-96
MWcp645	Southern Africa	1	1	3.71e-09	2.53e-22	8.27e-20	3.04e-11	2.16e-20	9.22e-17	7.29e-09	3.19e-96
MWcp66	Southern Africa	1	1	2.41e-09	5.86e-21	1.03e-21	5.22e-10	2.46e-19	1.44e-14	5.02e-08	4.74e-90
MWcp91	Southern Africa	1	0.00664208	0.0137361	6.1e-27	4.04e-30	0.979622	2.6e-22	7.91e-19	1.72e-18	5.68e-90
MZcp 014	Southern Africa	1	0.999998	1.99e-06	7.86e-24	1.23e-23	3.61e-07	9.94e-19	2.07e-15	5.5e-10	2.02e-90
MZcp 016	Southern Africa	1	0.999974	2.62e-05	1.41e-26	2.99e-22	1.59e-07	1.16e-17	1.44e-16	2.09e-10	1.77e-90
MZcp 026	Southern Africa	1	0.999997	2.57e-06	8.09e-23	1.29e-23	6.03e-07	4.72e-19	4.94e-16	1.64e-10	2.24e-91
MZcp 030	Southern Africa	1	1	1.5e-07	1.2e-21	3.54e-24	2.61e-08	1.95e-18	1.23e-15	5.27e-09	1.98e-92
MZcp 045	Southern Africa	1	1	8.45e-08	3.24e-24	1.81e-23	1.98e-08	1.11e-20	5.29e-15	2.48e-09	2.19e-95
MZcp 046	Southern Africa	1	1	8.47e-09	1.8e-15	1.02e-28	8.91e-08	3.24e-20	1.47e-16	4.92e-09	5.99e-102
Raha 1	East Africa	1	1	3.79e-08	8.12e-19	2.47e-27	1.79e-08	5.69e-17	1.47e-15	1.08e-07	2.48e-94
Raha 2	East Africa	1	1	6.85e-10	1.76e-20	6.4e-21	1.02e-07	6.37e-24	5.56e-12	9.51e-10	9.36e-87
Sudani 1	Southern Africa	1	1	1.51e-11	3.58e-17	4.67e-18	3.34e-11	1.68e-22	2.23e-14	1.32e-08	6.08e-89
Tumaini	East Africa	1	1	2.41e-08	3.16e-25	7.52e-23	3.74e-08	2.31e-21	6.69e-13	7.25e-09	6.34e-91
TVu-1007	America	1	1	6.29e-11	9.2e-13	2.84e-25	2.96e-09	1.31e-21	1.72e-15	1.5e-08	3.36e-97
TVu-1042	Unknown	1	0.998196	7.14e-13	1.31e-19	2.36e-23	6.55e-12	2.44e-18	2.44e-09	0.00180438	6.81e-83
TVu-1143	America	1	0.999682	0.000317654	3.68e-25	1.56e-22	4.42e-13	4.1e-07	1.02e-23	3.87e-07	4.7e-97
TVu-11674	Southern Africa	1	0.999999	8.85e-07	8.48e-24	2.9e-23	2.42e-07	1.45e-17	3.96e-14	4.46e-09	3.79e-85
TVu-1177	East Africa	1	1	7.47e-08	1.33e-26	1.12e-21	1.69e-08	3.72e-21	1.04e-13	2.98e-09	1.8e-91
TVu-1185	East Africa	1	1	7.79e-10	1.47e-20	1.85e-20	6.17e-11	2.85e-21	4.58e-16	8.87e-09	4.8e-96
TVu-13413	Southern Africa	1	0.999597	0.0003384	3.92e-22	8.6e-25	6.41e-05	4.5e-20	5.24e-19	2.25e-13	1.17e-97
TVu-14528	West Africa	1	0.999998	2.3e-06	4.82e-24	7.45e-27	1.86e-07	5.21e-17	1.93e-15	1.34e-08	5.37e-94
TVu-1460	Unknown	1	1	7.36e-11	1.09e-20	1.44e-21	1.05e-08	2e-22	2.3e-10	9.54e-08	1.03e-83
TVu-1478	Southern Africa	1	0.999997	2.49e-11	2.34e-18	5.36e-25	3.8e-09	1.27e-20	1.14e-10	2.87e-06	4.15e-87
TVu-16664	East Africa	1	0.999998	7.28e-08	1.6e-23	3.03e-25	1.19e-09	2.19e-15	1.43e-14	1.46e-06	4.68e-90
TVu-17526	Unknown	1	0.999995	1.83e-08	4.48e-32	2.13e-17	4.35e-06	1.6e-26	1.76e-07	1.83e-10	4.79e-78
TVu-17537	Unknown	1	0.999997	1.6e-10	1.89e-16	4.82e-26	4.94e-10	7.27e-18	7.4e-14	3.34e-06	1.25e-91
TVu-17553	Unknown	1	1	5.1e-09	1.28e-23	2.18e-22	3.93e-09	6.19e-22	5.19e-14	7.06e-09	1.53e-94
TVu-17565	Unknown	1	0.000269688	1.72e-16	0.99973	6.75e-34	1.49e-12	4.67e-23	1.68e-21	1.57e-11	4.48e-103
TVu-17721	Unknown	1	0.993978	8.6e-13	2.94e-25	7.47e-22	1.42e-11	2.44e-19	2.86e-06	0.00601936	1.57e-77
TVu-2098	West Africa	1	1	7.02e-09	5.21e-27	2.43e-18	1.95e-09	1.83e-24	6.53e-14	3.19e-10	1.02e-93
TVu-2657	Southern Africa	1	1	2.16e-10	4.57e-23	1.64e-23	4.87e-08	2.76e-26	1.38e-11	3e-09	5.73e-97
TVu-2661	Southern Africa	1	0.998749	6.47e-05	3.3e-21	2.91e-23	0.0011862	4.64e-20	2.82e-15	6.33e-13	7.81e-84
TVu-267	America	1	0.985573	1.33e-14	1.95e-19	1.49e-25	5.9e-13	3.02e-21	7.63e-09	0.0144271	4.37e-93
TVu-2685	Asia	1	1	1.45e-08	7.65e-23	1.2e-20	7.9e-10	6.1e-19	7.82e-15	1.74e-08	1.53e-88
TVu-2687	Asia	1	1	1.9e-08	4.52e-23	1.21e-20	8.22e-10	1e-18	7.47e-15	1.83e-08	2.87e-88
TVu-273	America	1	1	1.05e-09	4.78e-21	2.19e-21	3.63e-09	1.58e-20	8.73e-13	3.63e-08	3.3e-86
TVu-3101	Asia	1	1	1.66e-10	1.61e-14	1.67e-24	2.18e-09	2.16e-21	1.33e-15	1.15e-08	9.16e-97
TVu-3224	Asia	1	1	6.34e-09	1.66e-21	1.14e-20	2.09e-08	2.09e-22	3.68e-14	5.37e-10	4.54e-90
TVu-3259	Asia	1	1	4.3e-10	1.51e-11	8.85e-27	9.11e-10	4.49e-18	2.38e-17	7.44e-08	6.39e-98
TVu-3508	Asia	1	0.999999	8.56e-09	1.86e-21	1.42e-27	1.63e-07	1.04e-18	7.26e-12	4.9e-07	1.73e-89
TVu-3509	Asia	1	0.999994	3.84e-06	1.66e-22	8.03e-27	1.81e-06	9.16e-19	4.08e-16	4.76e-10	6.22e-96
TVu-3510	Asia	1	0.999998	2.54e-09	5.55e-26	2.56e-21	3.8e-10	1.55e-18	1.21e-11	1.6e-06	2.3e-84
TVu-3511	Asia	1	1	1.07e-08	1.38e-16	1.37e-24	3.05e-09	5.02e-18	6.66e-17	1.22e-08	2.26e-94
TVu-3524	Asia	1	1	1.38e-08	3.35e-21	3.44e-25	2.76e-08	1.71e-20	1.56e-14	1.04e-08	2.07e-95
TVu-3525	Asia	1	0.999987	1.38e-10	8.79e-21	5.15e-24	2.49e-11	4.6e-18	2.04e-13	1.26e-05	6.02e-92
TVu-3526	Asia	1	0.999991	2.04e-10	5.7e-21	5.97e-24	3.16e-11	4.77e-18	1.51e-13	8.82e-06	5.6e-92
TVu-3533	Asia	1	0.999999	8.43e-09	2.24e-20	7.75e-26	2.51e-08	1.47e-16	2.28e-12	1.36e-06	2.05e-84
TVu-46	West Africa	1	1	1.03e-09	1.78e-16	1.76e-25	1.39e-08	1.17e-18	9.64e-14	1.47e-07	4.9e-89
TVu-81	Southern Africa	1	0.999801	7.15e-08	5.06e-16	6.99e-28	0.000198682	2.86e-21	2.69e-13	1.84e-10	3.5e-89
TZcp34	East Africa	1	1	3.63e-10	6.21e-24	4.41e-20	4.16e-09	1.35e-22	6.04e-11	3.61e-08	6.13e-85
TZcp43	East Africa	1	1	4.82e-08	1.06e-23	1.21e-24	1.95e-08	1.25e-18	1.12e-13	6.14e-08	1.05e-90
TZcp5	East Africa	1	0.999999	9.07e-07	2.7e-25	9.92e-26	2.38e-08	4.77e-17	3.8e-15	4.28e-08	1.13e-93
TZcp50	East Africa	1	0.999991	1.92e-06	4.04e-27	1.45e-25	7.55e-06	5.9e-21	7.35e-13	7.65e-10	9.83e-92
TZcp67	East Africa	1	1	4.86e-08	8.88e-25	6.35e-24	3.62e-09	3.26e-18	4.99e-14	1.18e-07	2.61e-91
TZcp70	East Africa	1	1	2.42e-07	6.29e-23	1.86e-25	6.61e-08	8.2e-19	3.6e-15	7.13e-09	2.21e-94
TZcp95	East Africa	1	0.999999	8.18e-09	1.62e-22	3.4e-26	1.3e-08	3.76e-18	1.27e-12	8.45e-07	3.58e-90
UAM09-1046-6-1	West Africa	1	1	5.68e-10	4.63e-24	5.19e-20	1.96e-10	1.01e-20	1.39e-12	1.52e-07	1.63e-87
V1-F3	Southern Africa	1	0.999999	1.37e-08	1.63e-21	9.6e-26	5.81e-07	1.33e-21	8.91e-13	5.44e-09	2.59e-92
V3-F0	Southern Africa	1	1	1.39e-09	9.52e-24	2.68e-21	1.48e-09	4.13e-24	2.51e-14	1.8e-09	4.89e-98
Vuli-2	East Africa	1	0.999998	2.3e-07	1.09e-23	1.45e-23	1.39e-06	2.44e-21	1.38e-13	3.62e-10	6.4e-90
MWcp03	Southern Africa	2	5.02e-09	0.999966	6.91e-40	7.58e-37	3.35e-05	3.34e-19	2.02e-33	9.99e-28	4.83e-99
MWcp07	Southern Africa	2	0.000429227	0.999567	1.2e-32	4.11e-30	3.9e-06	1.69e-14	2.82e-27	2.83e-18	1.63e-98
MWcp10	Southern Africa	2	0.0198926	0.980102	2.81e-30	5.75e-25	5.1e-06	5.19e-14	1.32e-24	4.37e-16	6.2e-93
MWcp15	Southern Africa	2	2.89e-10	0.999998	1.35e-42	4.94e-37	2.16e-06	2.14e-19	3.63e-36	9.25e-30	2.5e-100
MWcp29	Southern Africa	2	3.16e-08	0.999988	2.24e-38	7.62e-36	1.19e-05	6.16e-19	2.03e-33	1.59e-26	1.44e-102
MWcp35	Southern Africa	2	2.19e-08	0.999987	1.12e-38	3.68e-36	1.3e-05	3.88e-19	1.31e-33	8.04e-27	7.38e-103
MWcp36	Southern Africa	2	1.16e-10	0.999999	5.03e-44	5.53e-38	9.91e-07	1.53e-19	7.54e-37	3.69e-30	2.54e-102
MWcp37	Southern Africa	2	2.07e-10	1	9.76e-43	1.6e-40	3.55e-07	1.6e-14	2.04e-35	4.87e-27	8.1e-97
MWcp44	Southern Africa	2	5.39e-10	1	3.47e-46	5.1e-35	3.02e-08	1.36e-17	1.11e-35	6.27e-28	1.46e-99
MWcp48	Southern Africa	2	4.73e-08	0.999994	2.04e-39	3.45e-35	6.22e-06	2.12e-17	4.33e-32	2.73e-25	5.15e-98
MWcp49	Southern Africa	2	1.85e-10	1	1.41e-46	4.78e-38	8.5e-11	3.86e-11	2.11e-37	3.2e-25	8.02e-99
MWcp50	Southern Africa	2	1.79e-08	0.999985	6.99e-39	9.74e-36	1.46e-05	3.67e-19	1.67e-33	4.89e-27	2.9e-101
MWcp53	Southern Africa	2	4.68e-05	0.999953	1.47e-36	2.65e-29	3.93e-08	1.04e-12	4.75e-29	1.06e-18	2.16e-96
MWcp57	Southern Africa	2	1.07e-08	0.999993	5.5e-42	7.4e-36	6.55e-06	7.65e-19	1.26e-32	1.38e-26	1.2e-99
MWcp601	Southern Africa	2	2.93e-10	0.999997	2.4e-42	3.31e-37	2.82e-06	1.93e-19	3.82e-36	8.57e-30	2.23e-100
MWcp63	Southern Africa	2	2.24e-08	0.999986	8.33e-39	2.86e-36	1.41e-05	4.97e-19	2.06e-33	1.08e-26	1.62e-102
MWcp64	Southern Africa	2	4.31e-11	1	6.62e-46	1.82e-36	9.24e-08	7.41e-19	1.05e-37	1.38e-30	6.59e-100
MWcp68	Southern Africa	2	2.64e-10	0.999996	1.24e-42	3.08e-37	3.63e-06	1.17e-19	5.29e-36	6.5e-30	3.9e-100
MWcp73	Southern Africa	2	5.04e-09	0.999996	3.26e-41	7.03e-36	4.34e-06	3.11e-19	4.1e-34	1.19e-27	3.57e-101
MZcp 011	Southern Africa	2	0.0103438	0.983076	6.83e-27	5.42e-30	0.00658069	1.42e-14	1.43e-22	1.16e-16	3.28e-89
MZcp 012	Southern Africa	2	5.1e-06	0.999995	1.14e-41	2.82e-31	1.59e-08	9.46e-13	7.62e-29	3.89e-19	4.54e-96
MZcp 013	Southern Africa	2	3.51e-06	0.999993	1.21e-30	1.13e-29	3.48e-06	9.59e-18	1.28e-33	9.68e-25	2.97e-101
MZcp 015	Southern Africa	2	1.72e-10	1	1.44e-45	4.89e-38	6.34e-09	9.06e-16	2.17e-37	1.07e-27	6.29e-103
MZcp 020	Southern Africa	2	1.73e-07	0.999966	3.98e-37	3.55e-34	3.35e-05	6.12e-20	1.92e-32	4.5e-26	4.62e-103
MZcp 021	Southern Africa	2	1.21e-10	1	7.91e-48	8.43e-39	1.24e-07	1.21e-17	2.3e-35	3.59e-28	5.6e-101
MZcp 022	Southern Africa	2	4.04e-07	0.999987	2.34e-37	8.99e-33	1.25e-05	1.82e-18	2.03e-31	8.2e-25	3.84e-99
MZcp 023	Southern Africa	2	2.73e-06	0.999905	6.24e-31	3.17e-33	9.24e-05	9.9e-17	4.05e-31	1.16e-23	2.98e-97
MZcp 024	Southern Africa	2	7.76e-08	0.999895	2.28e-26	5.74e-36	0.000104719	9.34e-17	2.06e-36	1.83e-27	3.49e-100
MZcp 025	Southern Africa	2	1.25e-08	0.999685	8.33e-30	7.56e-36	0.000314699	5.78e-20	7.96e-37	7.69e-30	8.37e-102
MZcp 032	Southern Africa	2	1.76e-07	1	2.35e-44	2.21e-31	5.7e-08	2.06e-15	2.42e-30	9.29e-23	4.63e-94
MZcp 044	Southern Africa	2	1.72e-06	0.99965	5.4e-29	1.17e-34	0.000348419	4.9e-18	1.93e-32	6.81e-25	1.28e-101
TVu-2692	Asia	2	1.08e-05	0.999989	9.41e-39	7.95e-28	2.58e-08	5.91e-14	1.03e-29	2.26e-20	3.45e-94
TVu-3231	Asia	2	8.11e-06	0.999992	6.48e-39	7.93e-28	2.48e-08	4.48e-14	6.31e-30	1.19e-20	4.37e-94
Danila	West Africa	3	1.89e-17	3.14e-29	1	1.45e-52	8.53e-24	3.9e-38	2.2e-41	3.4e-28	3.4e-134
INIA-73	Southern Africa	3	5.85e-10	4.37e-19	1	4.11e-38	1.58e-16	2.45e-26	1.71e-33	3.34e-21	2.89e-109
IT07K-297-13	West Africa	3	2.92e-26	1.06e-46	1	2.53e-62	1.79e-40	2.46e-46	1.88e-46	7.94e-29	5.44e-146
IT07K-318-33	West Africa	3	3.63e-21	6.62e-39	1	1.54e-50	1.56e-33	2.54e-43	1.84e-42	7.71e-28	9.94e-134
IT08K-150-12	West Africa	3	6.19e-25	1.36e-46	1	8.04e-57	3.56e-39	1.41e-46	1.12e-41	2.98e-27	4.92e-133
IT08K-180-11	West Africa	3	2.78e-26	1.64e-45	1	1.53e-63	9.31e-38	2.73e-46	5.95e-45	7.12e-30	1.29e-139
IT10K-973-1	West Africa	3	6.24e-23	3.11e-44	1	7.03e-56	2.43e-38	1.56e-44	1.22e-41	4.69e-25	1.99e-140
IT10K-985-3	West Africa	3	4.47e-22	5.84e-42	1	1.97e-50	3.99e-32	9.93e-54	1.09e-39	3.92e-31	2.98e-137
IT835-728-5	West Africa	3	5.64e-19	3.72e-36	1	8.44e-54	3.58e-29	1.84e-39	1.37e-36	7.73e-24	1.1e-127
IT93K-452-1	West Africa	3	1.46e-25	3.68e-44	1	1.19e-46	4.67e-40	6.19e-41	1.06e-45	1.52e-30	1.3e-109
IT98K-205-8	West Africa	3	4.19e-24	3.51e-39	1	7.72e-59	1.17e-31	2.92e-41	2.44e-43	6.39e-31	1.99e-122
IT99K-529-1	West Africa	3	2.48e-14	1.3e-29	1	1.24e-36	1.13e-25	2e-34	3.42e-34	1.79e-22	2.03e-108
IT99K-573-2-1	West Africa	3	6.05e-23	2.52e-39	1	8.85e-58	5.65e-30	4.24e-47	2.45e-41	2.48e-31	5.43e-132
Sanzi	West Africa	3	1.17e-21	6.92e-40	1	3.05e-53	1.61e-31	5.47e-45	1.2e-38	6.87e-28	3.79e-126
TVu-1006	America	3	1.21e-17	1.05e-33	1	3.95e-49	1.01e-29	1.88e-36	3.5e-39	2.03e-23	8.35e-130
TVu-10169	Asia	3	3.12e-19	1.25e-35	1	4.17e-51	8.54e-30	3.18e-39	6.84e-39	2.1e-25	1.56e-126
TVu-1149	America	3	1.46e-16	7.56e-34	1	2.65e-47	1.28e-28	6.11e-42	5.15e-38	5.42e-24	1.13e-139
TVu-1472	America	3	3.49e-19	2.24e-33	1	1e-50	3.52e-24	2.68e-42	1.68e-36	3.19e-29	6.15e-116
TVu-1483	Europe	3	3.26e-14	1.4e-33	1	7.46e-45	3.51e-29	2.46e-30	6.76e-29	3.24e-14	2.43e-112
TVu-154	West Africa	3	1.21e-20	7.86e-39	1	2.32e-60	3.43e-33	7.37e-36	2.21e-38	2.26e-21	9.77e-133
TVu-17179	West Africa	3	4.56e-25	1.57e-46	1	5.25e-54	4.22e-39	7.56e-50	2.26e-43	1.02e-29	2.58e-136
TVu-17423	West Africa	3	2.7e-28	4.31e-51	1	4.32e-56	5.4e-45	1.64e-46	1.1e-45	2.92e-29	6.99e-127
TVu-1909	Europe	3	8.51e-23	3.55e-43	1	4.01e-54	4.18e-34	5.05e-47	6.2e-38	2.6e-27	1.29e-126
TVu-2665	Southern Africa	3	2.31e-21	1.51e-34	1	4.41e-56	1.43e-27	2.08e-46	4.79e-46	1.35e-33	1.11e-144
TVu-2699	Asia	3	1.57e-21	1.87e-41	1	9.23e-53	1.01e-33	2.3e-41	3.76e-36	3.47e-24	2.36e-118
TVu-3067	Asia	3	6.99e-28	4.2e-45	1	2.25e-58	1.6e-37	1.69e-57	8.44e-54	4.14e-40	1.6e-157
TVu-3217	Asia	3	1.68e-19	4.1e-39	1	8.06e-50	1.24e-34	5.15e-37	1.9e-37	3.01e-21	3.18e-124
TVu-3233	Asia	3	2.17e-23	1.6e-43	1	3.82e-61	3.01e-39	1.27e-42	2.02e-45	5.1e-25	2.59e-153
TVu-3253	Asia	3	1.55e-19	4.58e-41	1	1.4e-48	1.78e-35	2.05e-40	8.82e-36	6.05e-21	7.33e-126
TVu-3261	Asia	3	3.91e-19	6.14e-37	1	2.17e-46	3.36e-30	2.22e-44	2.25e-38	4.62e-27	1.61e-127
TVu-3262	Asia	3	4.62e-15	8.87e-34	1	1.06e-49	3.54e-29	1.9e-32	1.15e-31	6.71e-16	4.93e-125
TVu-3263	Asia	3	5.99e-27	4.63e-45	1	3.77e-62	1.12e-36	1.07e-50	1.3e-47	3.83e-34	6.24e-144
TVu-3502	Asia	3	5.6e-12	3.41e-27	1	1.17e-41	6.16e-23	9.9e-34	4.46e-32	4.22e-19	7.98e-124
TVu-3540	Asia	3	7.37e-12	5.62e-33	1	4.08e-43	4.64e-29	1.67e-33	6.26e-28	5.74e-12	1.19e-129
TVu-3550	Asia	3	6.5e-22	7.41e-38	1	2.28e-54	3.51e-35	2.17e-37	2.33e-46	4.07e-27	3.61e-136
TVu-391	West Africa	3	1.02e-23	5.44e-47	1	8.02e-57	4.29e-39	3.9e-44	3.69e-37	4.7e-23	1.68e-127
TVu-416	America	3	4.46e-26	1.4e-47	1	2.48e-63	1.06e-40	1.08e-46	1.12e-44	2.09e-27	1.87e-146
TVu-990	Southern Africa	3	1.48e-13	2.7e-31	1	3.02e-44	1.55e-25	1.14e-34	1.12e-29	1.3e-17	1.17e-118
UAM09-1051-1	West Africa	3	2.53e-25	5.22e-43	1	3.5e-56	1.84e-37	2.43e-44	4.86e-47	3.13e-31	2.8e-133
Vuli-1	East Africa	3	1.83e-16	3e-34	1	2.84e-49	3.02e-26	6.86e-38	1.01e-30	8.53e-21	2.21e-116
IT04K-227-4	West Africa	4	1.11e-29	2.48e-40	3.7e-63	1	1.01e-49	5.21e-55	1.84e-46	2.41e-44	7.3e-72
IT07K-210-1-1	West Africa	4	4.05e-23	3.33e-35	6.23e-51	1	6.29e-40	1.84e-55	1.12e-38	1.63e-39	1.24e-78
IT07K-230-2-9	West Africa	4	6.66e-09	4.09e-20	8.63e-33	1	3.22e-24	1.09e-36	1.16e-25	2.18e-22	2.54e-80
IT07K-299-6	West Africa	4	7.69e-22	1.28e-31	8.67e-54	1	4.08e-36	5.81e-52	1.55e-35	1.68e-38	5.79e-69
IT10K-817-1A	West Africa	4	0.0372942	2.66e-16	3.98e-29	0.962706	2.34e-17	1.46e-33	1.15e-12	5.93e-12	1.25e-80
IT10K-817-1B	West Africa	4	4.69e-22	5.51e-34	6.27e-54	1	1.15e-37	4.01e-57	1.92e-35	9.81e-39	1.24e-79
IT10K-817-3	West Africa	4	1.92e-21	1.4e-33	1.92e-55	1	5.27e-37	1.19e-55	1.13e-32	8.02e-37	6.41e-75
IT10K-817-7	West Africa	4	7.44e-22	1.43e-34	1.5e-55	1	2.13e-37	4.92e-57	3e-32	3.62e-37	2.41e-74
IT10K-834-3	West Africa	4	1.06e-19	4.1e-32	1.6e-47	1	8.25e-37	2.2e-47	8.59e-33	8.31e-33	2.62e-68
IT13K-1079-3	West Africa	4	1.41e-35	5.34e-46	2.41e-66	1	6.64e-49	1.28e-71	4.88e-48	4.35e-57	7.65e-63
IT90K-76	West Africa	4	2.98e-21	2.35e-32	4.34e-47	1	3.4e-41	2.35e-42	1.18e-39	1.31e-33	7.75e-71
IT97K-499-35	West Africa	4	4.99e-36	9.7e-48	2.01e-71	1	1.62e-54	3.94e-74	9.45e-53	2.57e-56	1.31e-87
IT98K-131-2	West Africa	4	1.62e-27	1.4e-42	8.03e-62	1	9.53e-46	5.63e-68	1.77e-38	1.11e-43	9.54e-86
IT98K-503-1	West Africa	4	5.31e-30	3.53e-43	7.33e-63	1	3.59e-48	1.4e-66	7.67e-44	2.72e-47	6.94e-82
IT99K-573-1-1	West Africa	4	1.32e-24	1.4e-35	5.23e-59	1	3.1e-42	8.15e-56	5.63e-40	1.68e-40	8.37e-80
IT99K-7-21-2-2-1	West Africa	4	2.83e-28	2.67e-44	1.28e-52	1	5.6e-46	1.65e-60	1.71e-36	9.96e-42	4.81e-58
Mkanakaufiti	Southern Africa	4	3.41e-25	2.28e-35	1.38e-59	1	1.26e-41	2.04e-60	1.04e-42	4.7e-44	5.4e-89
TVu-14828	West Africa	4	1.33e-24	6.86e-41	4.7e-43	1	5.41e-44	1.29e-51	8.08e-36	4.9e-36	2.39e-58
TVu-15631	West Africa	4	1.5e-22	7.82e-42	5.88e-52	1	8.73e-44	4.2e-64	5.08e-32	1.06e-34	5.5e-92
TVu-15693	West Africa	4	1.48e-13	2.1e-25	8.4e-46	1	1.65e-30	1.09e-40	5.51e-26	7.01e-25	3.85e-73
TVu-16829	Unknown	4	5.7e-20	8.62e-33	1.51e-50	1	2.03e-35	2.1e-48	4.62e-28	3.13e-32	6.74e-57
TVu-4568	West Africa	4	0.0133929	1.16e-13	2.12e-36	0.81489	5.81e-10	2.94e-30	0.171717	3.92e-12	5.2e-37
TVx-3236	West Africa	4	2.2e-20	6.2e-32	1.98e-52	1	8.68e-37	5.76e-48	5.35e-32	1.59e-33	3.57e-65
UAM14-126-19-2	West Africa	4	3.15e-24	6.95e-38	4.34e-59	1	1.25e-38	7.34e-58	1.99e-28	1.01e-37	1.66e-54
Vuli-AR 1	East Africa	4	1.11e-16	5.32e-29	7.27e-43	1	1.66e-34	1.42e-43	4.14e-32	2.11e-29	4.5e-75
Vuli-AR 2	East Africa	4	1.39e-16	3.59e-29	1.69e-49	1	8.23e-35	1.54e-46	3.77e-30	6.96e-29	6.47e-81
B301	West Africa	5	0.21965	0.0030452	1.87e-22	2.76e-29	0.777305	1.09e-20	2.95e-16	5.06e-15	7.94e-89
MWcp04	Southern Africa	5	9.76e-12	7.03e-09	5.12e-36	8.74e-44	1	1.24e-38	1.26e-23	1.45e-32	4.69e-96
MWcp09	Southern Africa	5	8.32e-12	9.53e-09	6.61e-36	1.51e-45	1	4.31e-37	1.64e-23	8.2e-32	1.02e-95
MWcp19	Southern Africa	5	9.15e-07	0.00313426	2.84e-32	5.41e-32	0.996865	5.28e-26	5.79e-23	7.25e-26	8.07e-84
MWcp21	Southern Africa	5	1.29e-11	4.73e-08	3.22e-36	1.37e-44	1	3.62e-36	3.97e-24	6.82e-32	3.97e-95
MWcp24	Southern Africa	5	1.02e-11	6.94e-09	5.05e-36	8.65e-44	1	1.89e-38	1.81e-23	2.02e-32	1.49e-95
MWcp26	Southern Africa	5	1.23e-06	0.117463	5.36e-36	2.9e-34	0.882535	1.09e-23	7.96e-24	4.9e-25	1.28e-88
MWcp28	Southern Africa	5	8.16e-12	1.11e-08	5.82e-36	1.75e-45	1	5.38e-37	1.36e-23	7.41e-32	1.43e-95
MWcp32	Southern Africa	5	1.03e-11	7.89e-09	2.98e-36	1.16e-43	1	2.35e-38	2.05e-23	2.09e-32	3.81e-95
MWcp33	Southern Africa	5	1.32e-08	0.00981516	6.23e-37	5.13e-42	0.990185	3.64e-24	4.22e-25	2.06e-26	9.21e-93
MWcp40	Southern Africa	5	1.3e-06	0.183454	1.24e-33	3.7e-37	0.816544	4.06e-22	3.94e-25	1.72e-24	5.27e-93
MWcp45	Southern Africa	5	1.13e-11	7.3e-09	5.39e-36	1.04e-43	1	2.22e-38	2.01e-23	2.38e-32	1.87e-95
MWcp46	Southern Africa	5	2.81e-10	3.87e-09	9.74e-36	9.26e-38	1	2.45e-39	2.8e-20	9.5e-31	2.39e-89
MWcp54	Southern Africa	5	3.91e-10	4.89e-09	1.1e-35	3.09e-38	1	1.05e-39	1.31e-20	1.1e-30	1.25e-92
MWcp60	Southern Africa	5	3.21e-11	2.02e-09	3.74e-34	1.53e-44	1	2.34e-37	8.34e-22	1.55e-30	5.33e-94
MWcp65	Southern Africa	5	9.31e-12	1.32e-08	6.61e-36	1.97e-45	1	6.32e-37	1.11e-23	8.03e-32	6.36e-96
MWcp67	Southern Africa	5	1.16e-05	0.00799077	3.84e-31	8.38e-36	0.991998	8.55e-24	4.18e-22	1.39e-22	1.9e-92
MWcp69	Southern Africa	5	1.96e-06	0.993221	3.17e-34	4.14e-34	0.00677738	7.04e-21	7.9e-29	6.22e-25	1.32e-98
MWcp71	Southern Africa	5	0.00015572	6.45e-05	2.64e-25	4.23e-35	0.99978	1.93e-25	5.85e-19	4.14e-20	1.52e-92
MWcp76	Southern Africa	5	0.00290363	0.000504501	1.36e-23	1.08e-33	0.996592	3.34e-23	1.33e-18	4.01e-18	2.01e-93
MWcp77	Southern Africa	5	6.86e-06	5.04e-06	4.57e-30	2.96e-38	0.999988	1.44e-27	1.84e-17	6.55e-21	1.19e-91
TVu-13600	Southern Africa	5	0.00117869	0.00476237	4.46e-28	5.4e-28	0.994059	1.57e-25	8.7e-20	3.47e-21	4.44e-89
TVu-14745	Southern Africa	5	0.00356082	0.000216129	6.71e-24	6.76e-30	0.996223	4.16e-25	6.74e-18	4.75e-19	4.16e-89
TVu-15462	Southern Africa	5	4.12e-09	9.4e-08	1.04e-34	1e-42	1	2.04e-30	4.36e-18	5.95e-25	1.64e-85
TVu-17060	Southern Africa	5	0.000701912	5.81e-10	2.21e-25	2.78e-34	0.999298	4.9e-31	3.61e-08	1.26e-15	1.09e-82
TZcp84	East Africa	5	2.22e-05	1.29e-11	3.41e-28	3.28e-32	0.999977	5.48e-35	7.33e-07	2.2e-18	9.25e-74
IT82E-16	Southern Africa	6	1.37e-14	2.24e-18	7.02e-35	7.81e-40	2.65e-31	1	1.28e-35	2.62e-11	2.79e-82
MWcp08	Southern Africa	6	4.9e-17	1.94e-14	4.07e-40	1.87e-50	3.61e-28	1	7.88e-43	1.14e-17	1.3e-96
MWcp20	Southern Africa	6	3.27e-29	9.73e-24	1.46e-53	3.93e-66	5.9e-42	1	5.84e-58	1.97e-26	3.43e-103
MWcp23	Southern Africa	6	7.98e-10	5.57e-08	2.46e-33	6.89e-42	1.85e-18	1	4.56e-33	4.22e-13	5.38e-90
MWcp30	Southern Africa	6	1.09e-27	7.65e-22	2.08e-52	3.3e-65	3.02e-39	1	4.41e-56	7.78e-26	1.01e-102
MWcp34	Southern Africa	6	7.76e-30	2.54e-23	9.43e-55	1.65e-69	7.8e-41	1	6.21e-58	3.02e-27	2.32e-103
MWcp39	Southern Africa	6	9.54e-28	2.6e-21	1.18e-53	1.21e-65	8.55e-39	1	3.98e-56	3.53e-26	5.4e-103
MWcp47	Southern Africa	6	5.38e-30	5.87e-24	5.74e-55	7.84e-68	2.17e-42	1	6.44e-59	3.64e-27	2.8e-104
MWcp51	Southern Africa	6	4.39e-17	2.7e-13	2.32e-42	1.36e-52	1.98e-26	1	6.89e-42	4.26e-18	4.74e-96
MWcp55	Southern Africa	6	9.73e-16	3.76e-14	8.35e-20	2.3e-54	2.01e-24	1	1.69e-46	2.63e-19	9.89e-104
MWcp59	Southern Africa	6	3.34e-06	3.45e-06	1.33e-30	5.13e-34	1.07e-16	0.999993	5.3e-29	9.41e-10	4.22e-88
MWcp61	Southern Africa	6	7.46e-10	9.72e-11	4.66e-33	1.01e-40	2.15e-21	1	3.37e-31	2.48e-10	5.32e-89
TVu-17713	Unknown	6	1.8e-05	2.24e-12	5.89e-26	4.43e-34	6.99e-22	0.973784	1.17e-23	0.0261978	1.83e-89
TVu-1002	America	7	2.96e-20	5.6e-41	7.06e-49	2.58e-42	3.58e-26	6.9e-52	1	4.43e-17	4.38e-61
TVu-1010	America	7	2.19e-12	2.71e-32	1.11e-36	1.58e-35	1.27e-20	8.36e-43	1	1.38e-10	3.14e-72
TVu-10987	West Africa	7	5.47e-13	8.1e-30	6.79e-40	2.68e-34	1.89e-18	4.85e-40	1	1.01e-12	5e-58
TVu-11372	Central Africa	7	2.23e-05	1.4e-21	1.05e-30	3.56e-29	1.64e-12	7.95e-36	0.999978	1.38e-07	4.49e-80
TVu-1146	America	7	1.35e-17	7e-40	1e-42	3.01e-39	1.17e-24	3.74e-54	1	5.5e-16	8.87e-73
TVu-13265	America	7	3.37e-19	6.04e-42	7.67e-47	1.23e-36	2.22e-27	4.78e-55	1	6.64e-17	3.36e-65
TVu-14004	Southern Africa	7	8.32e-16	2.78e-28	5.19e-50	1.33e-21	2.25e-18	3.49e-38	1	2.88e-19	1.42e-15
TVu-1491	America	7	1.75e-09	1.07e-28	2.71e-36	1.61e-30	1.74e-18	1.62e-42	1	1.24e-09	3.44e-79
TVu-1527	Unknown	7	2.75e-19	2.84e-39	1.19e-47	3.63e-31	3.11e-26	1.54e-48	1	8.96e-18	9.77e-41
TVu-15898	West Africa	7	1.28e-13	9.56e-38	2.57e-27	2.92e-35	1.51e-23	8.54e-46	1	1.37e-10	5.41e-69
TVu-16325	Europe	7	2.09e-23	1.49e-45	1.32e-51	1.16e-43	4.7e-29	1.07e-56	1	9.28e-20	2.37e-56
TVu-16816	Central Africa	7	6.56e-09	6.04e-26	1.89e-32	8.49e-35	1.39e-14	4.68e-39	1	6.2e-10	1.27e-75
TVu-1785	Asia	7	2.75e-13	8.77e-33	5.48e-41	6.93e-31	5.39e-21	1.53e-46	1	1.6e-13	9.12e-67
TVu-1806	Southern Africa	7	2.81e-10	2.23e-27	4.83e-37	2.66e-33	8.25e-17	1.75e-39	1	1.5e-10	2.92e-70
TVu-22	Asia	7	2.05e-12	8.63e-33	2.25e-36	3.42e-36	1.49e-20	1.1e-44	1	6.2e-11	2.16e-76
TVu-2656	Southern Africa	7	6e-14	2.03e-32	3.04e-40	6.41e-35	4.47e-19	3.97e-47	1	6.12e-15	1.63e-66
TVu-2701	Asia	7	1.89e-16	8.33e-39	6.39e-42	4.45e-38	1.72e-25	1.15e-49	1	3.79e-13	6.44e-72
TVu-2706	Asia	7	1.52e-07	2.93e-24	3.61e-34	6.51e-30	5.19e-15	4.87e-37	1	1.23e-08	1.91e-74
TVu-2716	Asia	7	1.74e-07	4.88e-24	4.23e-34	1.49e-36	5.78e-17	1.55e-28	0.998403	0.00159723	2.08e-75
TVu-3063	Asia	7	3.08e-07	2.08e-24	1.7e-29	1.67e-35	2.45e-15	1e-31	0.999976	2.4e-05	1.29e-75
TVu-3064	Asia	7	1.46e-15	7.91e-35	3.47e-41	1.55e-33	5.28e-21	1.33e-48	1	2.96e-16	4.64e-59
TVu-3094	Asia	7	9.87e-19	7.21e-40	8.49e-47	4.29e-36	5.28e-25	1.83e-54	1	4.29e-18	5.64e-62
TVu-3097	Asia	7	1.28e-17	2.57e-39	8.23e-45	9.26e-36	1.89e-25	4.79e-52	1	7.81e-16	7.34e-65
TVu-322	America	7	3.47e-12	6.26e-32	1.61e-36	1.89e-35	2.4e-20	1.82e-42	1	1.76e-10	2.67e-72
TVu-361	America	7	1.76e-17	1.22e-39	7.89e-45	4.8e-33	6.99e-25	2.6e-56	1	1.02e-17	1.62e-67
TVu-692	Europe	7	1.01e-13	4.82e-34	7.3e-39	2.89e-36	5.16e-21	1.85e-47	1	6.5e-13	2.98e-74
TVu-972	West Africa	7	0.975325	5.4e-19	7.96e-25	6.46e-15	2.27e-15	2.29e-30	0.0113722	0.0133025	6.84e-84
TVu-993	America	7	9.76e-14	1.11e-32	1.67e-40	7.08e-37	5.68e-21	6.91e-43	1	8.39e-12	1.08e-67
TVu-10180	Asia	8	1.59e-10	2.46e-30	1.83e-32	3.89e-37	1.01e-29	3.48e-23	9.79e-10	1	1.53e-87
TVu-1473	Asia	8	1.21e-10	6.16e-29	3.8e-27	3.07e-41	1.91e-31	5.61e-18	6.16e-17	1	6.12e-101
TVu-1482	Europe	8	8.39e-11	3.86e-29	3.38e-27	1.01e-41	1.25e-31	5.51e-18	4.8e-17	1	2.58e-101
TVu-17796	West Africa	8	2.1e-06	3.81e-24	6.05e-27	2.77e-31	4.25e-23	2.03e-21	2.37e-08	0.999998	6.13e-85
TVu-1797	America	8	7.56e-08	9.75e-26	1.38e-28	1.07e-32	1.06e-25	3.1e-20	8.08e-10	1	6.85e-84
TVu-2693	Asia	8	1.29e-10	7.51e-29	3.77e-27	3.63e-41	1.95e-31	7.16e-18	5.15e-17	1	5.58e-101
TVu-2695	Asia	8	0.0220771	1.64e-16	2.49e-19	1.07e-28	1.09e-17	9.12e-16	2.84e-12	0.977923	2.59e-93
TVu-2714	Asia	8	1.18e-10	5.5e-29	4.35e-27	3.1e-41	1.49e-31	5.12e-18	4.58e-17	1	2.13e-101
TVu-2720	Asia	8	1.42e-06	1.09e-26	1.39e-08	8.95e-37	1.37e-24	1.1e-19	1.71e-14	0.999999	1.76e-97
TVu-2978	Asia	8	9.72e-10	2.49e-32	7.44e-28	8.27e-38	3.66e-27	1.3e-29	3.19e-05	0.999968	2.94e-89
TVu-3090	Asia	8	0.778538	4.14e-15	6.87e-14	9.41e-28	3.04e-14	1.45e-17	3.54e-11	0.221462	2.24e-94
TVu-310	America	8	5.21e-06	1.58e-21	2.98e-24	2.88e-33	1.28e-23	4.59e-16	6.34e-14	0.999995	2.17e-93
TVu-3228	Asia	8	4.55e-06	2.96e-21	2.51e-24	1.19e-34	9.77e-24	1.1e-15	7.47e-15	0.999995	4.08e-97
TVu-3229	Asia	8	1.45e-09	4.05e-27	2.01e-29	1.74e-41	3.94e-25	4.15e-20	6.98e-09	1	7.14e-85
TVu-3235	Asia	8	3.1e-05	4.64e-20	4e-23	3.82e-34	1.36e-21	8.95e-16	1.94e-13	0.999969	1.22e-94
TVu-3243	Asia	8	1.1e-09	9.86e-28	1.22e-28	4.83e-38	6.94e-29	5.78e-19	2.74e-13	1	9.08e-92
TVu-3247	Asia	8	4.91e-10	6.88e-29	2.81e-27	1.26e-38	1.83e-30	1.23e-19	7.22e-15	1	2.99e-97
TVu-3248	Asia	8	0.026204	1.28e-13	1.07e-23	1.05e-28	1.13e-16	2.34e-11	7.44e-13	0.973796	2.14e-87
TVu-3249	Asia	8	1.05e-09	4.68e-28	1.23e-27	8.83e-38	6.11e-30	6.24e-19	8.17e-15	1	7.49e-96
TVu-3250	Asia	8	1.3e-09	6.44e-28	1.18e-27	1.68e-37	8.41e-30	6.4e-19	1.03e-14	1	1.57e-95
TVu-3252	Asia	8	1.26e-09	9.62e-28	1.75e-28	5.91e-38	7.84e-29	3.97e-19	3.05e-13	1	4.9e-92
TVu-3254	Asia	8	7.92e-10	4.63e-28	1.99e-28	1.81e-38	4.73e-29	3.42e-19	2.76e-13	1	3.84e-92
TVu-3257	Asia	8	7.77e-10	4.33e-28	1.37e-28	2.35e-38	4.08e-29	2.94e-19	2.86e-13	1	3.68e-92
TVu-3267	Asia	8	0.699892	1.7e-14	6.46e-24	4.89e-24	2.77e-14	3.61e-19	7.78e-08	0.300108	4.99e-88
TVu-328	America	8	1.33e-07	7.82e-24	8.09e-28	3.81e-37	5.72e-23	2.97e-18	1.92e-09	1	6.08e-84
TVu-3504	Asia	8	2.12e-10	2.05e-28	1.96e-27	3.87e-43	7.11e-27	3.68e-19	9.38e-11	1	1.71e-86
TVu-3506	Asia	8	4.11e-09	4.19e-33	2.48e-23	4.43e-34	4.67e-29	2.84e-30	8.41e-08	1	6.32e-95
TVu-3515	Asia	8	1.83e-07	1.24e-23	4.65e-28	3.92e-38	6.77e-24	1.06e-18	1.38e-11	1	4.03e-94
TVu-3532	Asia	8	9.03e-11	3.78e-29	3.08e-27	2.01e-41	1.21e-31	4.73e-18	5.74e-17	1	5.39e-101
TVu-3534	Asia	8	8.64e-09	5.59e-27	2.65e-24	5.77e-36	1.35e-28	4.96e-18	9.53e-15	1	4.43e-93
TVu-3535	Asia	8	5.25e-06	1.13e-22	2.8e-23	1.04e-32	4.23e-24	4.17e-18	1.85e-13	0.999995	1.66e-95
TVu-375	Southern Africa	8	1.27e-10	8.01e-29	4.28e-27	2.99e-41	2.23e-31	8.73e-18	5.44e-17	1	9.68e-101
TVu-387	America	8	0.00274423	2.11e-16	1.66e-23	1.36e-30	1.14e-17	1.89e-14	2.89e-11	0.997256	8.55e-88
TVu-406	America	8	1.15e-09	9.59e-28	8.3e-29	4.95e-38	7.8e-29	3.68e-19	3.7e-13	1	5.95e-92
Aloka Local	West Africa	9	2.78e-88	2.43e-98	9.72e-129	1.76e-70	1.07e-89	5.47e-98	2.31e-63	5.13e-91	1
IT99K-241-2	West Africa	9	2.17e-78	9.11e-86	1.94e-119	2.22e-63	5.55e-81	1.66e-82	3.5e-59	5.39e-81	1
MWcp05	Southern Africa	9	5.32e-100	2.52e-108	8.92e-139	1.09e-80	7.95e-101	1.45e-104	3.24e-76	6.65e-103	1
MWcp17	Southern Africa	9	1.24e-100	4.51e-109	2.94e-139	1.33e-81	1.22e-101	1.26e-104	1.14e-76	4.13e-103	1
MWcp43	Southern Africa	9	5.1e-100	1.69e-108	8.99e-139	9.26e-81	4.99e-101	1.78e-104	4.08e-76	1.09e-102	1
MWcp52	Southern Africa	9	5.91e-100	1.5e-108	3.01e-138	6.55e-81	3.93e-101	4.44e-104	3.87e-76	2.09e-102	1
MWcp62	Southern Africa	9	3.47e-100	1.35e-108	8.24e-139	4.58e-81	3.21e-101	2.72e-104	2.16e-76	8.96e-103	1
MWcp72	Southern Africa	9	1.91e-100	5.89e-109	4.93e-139	2.03e-81	1.78e-101	1.42e-104	1.93e-76	6.44e-103	1
TVu-10008	Unknown	9	2.26e-97	2.33e-106	3.85e-138	1.65e-76	5.62e-99	4.43e-104	3.56e-73	2.17e-100	1
TVu-10035	West Africa	9	6.5e-97	2.93e-105	1.42e-137	7.38e-79	1.28e-97	2.93e-102	1.79e-72	1.73e-99	1
TVu-1015	America	9	9.55e-70	1.36e-75	9.08e-108	2.45e-57	8.7e-72	1.79e-72	1.14e-54	1e-73	1
TVu-12256	West Africa	9	1.26e-97	8.9e-107	2.92e-140	1.47e-75	1.99e-99	1.94e-105	8.37e-73	8.95e-101	1
TVu-17474	Unknown	9	1.86e-88	1.66e-97	1.11e-126	1.13e-71	2.01e-89	6.36e-96	2.15e-65	1.28e-91	1
TVu-17657	Unknown	9	1.34e-52	6.5e-65	3.29e-92	1.16e-44	2.73e-53	3.59e-72	3.32e-28	6.63e-56	1
TVu-17660	Unknown	9	5.85e-72	3.93e-83	3.91e-113	3.39e-56	6.87e-74	9.23e-87	6.55e-48	2.25e-75	1
